# Supplementary material for: New miRNA Signature Heralds Human NK Cell Subsets at Different Maturation Steps: Involvement of miR-146a-5p in the Regulation of KIR Expression
Source: Front Immunol. 2018 Oct 15;9:2360. doi: 10.3389/fimmu.2018.02360 (PMC6196268; doi:10.3389/fimmu.2018.02360)
Supplement: Supplementary file 2 [file Data_Sheet_2.ZIP]

Archive with 8 entries (5 files):
- Supplementary File 2/
- Supplementary File 2/Legend Supplementary File 2.docx
- __MACOSX/
- __MACOSX/Supplementary File 2/
- __MACOSX/Supplementary File 2/._Legend Supplementary File 2.docx
- Supplementary File 2/Supplementary File 2.xlsx
- __MACOSX/Supplementary File 2/._Supplementary File 2.xlsx
- __MACOSX/._Supplementary File 2
