# Supplementary material for: New miRNA Signature Heralds Human NK Cell Subsets at Different Maturation Steps: Involvement of miR-146a-5p in the Regulation of KIR Expression
Source: Front Immunol. 2018 Oct 15;9:2360. doi: 10.3389/fimmu.2018.02360 (PMC6196268; doi:10.3389/fimmu.2018.02360)
Supplement: Supplementary file 2 [file Data_Sheet_2.ZIP › Supplementary File 2/Legend Supplementary File 2.docx]

**New miRNA signature heralds human NK cell subsets at different maturation steps: involvement of miR-146a-5p in the regulation of KIR expression**

**1Silvia Pesce#, 2Margherita Squillario#, 1,3Marco Greppi#, 4Fabrizio Loiacono, 5Lorenzo Moretta, 1,3Alessandro Moretta**†**, 1,3Simona Sivori, 6Patrizio Castagnola, 2Annalisa Barla*****, 7Simona Candiani*****, 1,3Emanuela Marcenaro***

#Equally contributed to this study

*These authors share senior authorship

†We dedicate this contribution to Alessandro Moretta who sadly passed away in mid February. We mourn his invaluable scientific insight and mentorship and, even more, his humanity, irony and smile.

1Department of Experimental Medicine (DIMES), University of Genoa, Genoa, Italy; 2Department of Informatic Bioengeneering, Robotic and System Engeneering, University of Genoa, Genoa, Italy; 3Centre of Excellence for Biomedical Research (CEBR), University of Genoa, Genoa, Italy; 4Immunology Operative Unit, IRCCS San Martino Polyclinical Hospital, Genoa, Italy; 5Department of Immunology, IRCCS Bambino Gesù Children’s Hospital, Rome, Italy; 6Department of Integrated Oncological Therapies, IRCCS San Martino Polyclinical Hospital, Genoa, Italy; 7Department of Earth Science, Environment and Life (DISTAV), University of Genoa, Genoa, Italy.

**Corresponding author**: Prof. Emanuela Marcenaro, Department of Experimental Medicine (DIMES) and Centre of Excellence for Biomedical Research (CEBR), University of Genoa, Via G.B. Marsano 10, 16132 Genoa, Italy. Phone: +39-010-3537888; Fax: +39-010-3537576; E-mail: [emanuela.marcenaro@unige.it](mailto:emanuela.marcenaro@unige.it)

**Co-corresponding author**: Prof. Simona Sivori, Department of Experimental Medicine (DIMES) and Centre of Excellence for Biomedical Research (CEBR), University of Genoa, Italy. Phone: +39-010-3537888; Fax: +39-010-3537576; E-mail: [simona.sivori@unige.it](mailto:emanuela.marcenaro@unige.it)

**Supplementary File 2**

**Target genes predicted for miRNAs upregulated on CD56bright and CD56dim**

Multi-table file containing a list of putative targets for the miRNAs described in Table 2 predicted by six prediction softwares (miRanda, mirDB, Pictar, PITA, TargetScan, ElMMo). The miRNAs are divided on the basis of their regulation on (**CD56bright**) CD56bright and (**CD56dim**) CD56dim,for every target is indicated the gene ID, Gene Symbol, Transcript ID and Software that predicted it.
