# Supplementary material for: New miRNA Signature Heralds Human NK Cell Subsets at Different Maturation Steps: Involvement of miR-146a-5p in the Regulation of KIR Expression
Source: Front Immunol. 2018 Oct 15;9:2360. doi: 10.3389/fimmu.2018.02360 (PMC6196268; doi:10.3389/fimmu.2018.02360)
Supplement: Supplementary file 2 [file Data_Sheet_2.ZIP › Supplementary File 2/Supplementary File 2.xlsx]

## Sheet: CD56bright
Target genes predicted for miRNAs upregulated on CD56bright
miRNA name	Gene ID	Gene Symbol	Transcript ID	Software
hsa-let-7e-5p	201626	2'-PDE	NM_177966	PITA
hsa-miR-1	201626	2'-PDE	NM_177966	PITA
hsa-miR-218-5p	201626	2'-PDE	NM_177966	PITA
hsa-let-7e-5p	29974	A1CF	NM_001198819	Eimmo
hsa-let-7e-5p	29974	A1CF	NM_138932	Eimmo
hsa-let-7e-5p	29974	A1CF	NM_001198820	Eimmo
hsa-let-7e-5p	29974	A1CF	NM_014576	Eimmo
hsa-let-7e-5p	29974	A1CF	NM_138933	Eimmo
hsa-let-7e-5p	29974	A1CF	NM_001198818	Eimmo
hsa-miR-1	29974	A1CF	NM_001198819	Targetscan
hsa-miR-1	29974	A1CF	NM_001198820	Targetscan
hsa-miR-1	29974	A1CF	NM_001198818	Targetscan
hsa-miR-1	29974	A1CF	NM_014576	Targetscan
hsa-miR-1	29974	A1CF	NM_138932	Targetscan
hsa-miR-1	29974	A1CF	NM_138933	Targetscan
hsa-miR-130a-3p	29974	A1CF	NM_001198820	Targetscan
hsa-miR-146a-5p	29974	A1CF	NM_001198819	Targetscan
hsa-miR-146a-5p	29974	A1CF	NM_001198818	Targetscan
hsa-miR-146a-5p	29974	A1CF	NM_001198820	Targetscan
hsa-miR-146a-5p	29974	A1CF	NM_138932	Targetscan
hsa-miR-146a-5p	29974	A1CF	NM_138933	Targetscan
hsa-miR-146a-5p	29974	A1CF	NM_014576	Targetscan
hsa-miR-17-3p	29974	A1CF	NM_001198818	Targetscan
hsa-miR-17-3p	29974	A1CF	NM_001198819	Targetscan
hsa-miR-17-3p	29974	A1CF	NM_001198820	Targetscan
hsa-miR-17-3p	29974	A1CF	NM_014576	Targetscan
hsa-miR-17-3p	29974	A1CF	NM_138933	Targetscan
hsa-miR-17-3p	29974	A1CF	NM_138932	Targetscan
hsa-miR-181a-3p	29974	A1CF	NM_001198819	Targetscan
hsa-miR-18a-5p	29974	A1CF	NM_001198818	Targetscan
hsa-miR-18a-5p	29974	A1CF	NM_001198820	Targetscan
hsa-miR-18a-5p	29974	A1CF	NM_001198819	Targetscan
hsa-miR-18a-5p	29974	A1CF	NM_138932	Targetscan
hsa-miR-18a-5p	29974	A1CF	NM_138933	Targetscan
hsa-miR-18a-5p	29974	A1CF	NM_014576	Targetscan
hsa-miR-195-5p	29974	A1CF	NM_014576	Eimmo
hsa-miR-195-5p	29974	A1CF	NM_001198819	Eimmo
hsa-miR-195-5p	29974	A1CF	NM_138932	Eimmo
hsa-miR-195-5p	29974	A1CF	NM_001198820	Eimmo
hsa-miR-195-5p	29974	A1CF	NM_138933	Eimmo
hsa-miR-195-5p	29974	A1CF	NM_001198818	Eimmo
hsa-miR-223-3p	29974	A1CF	NM_001198820	Targetscan
hsa-miR-31-3p	29974	A1CF	NM_001198818	Targetscan
hsa-miR-31-3p	29974	A1CF	NM_014576	Targetscan
hsa-miR-31-3p	29974	A1CF	NM_138933	Targetscan
hsa-miR-31-3p	29974	A1CF	NM_138932	Targetscan
hsa-miR-31-3p	29974	A1CF	NM_001198819	Targetscan
hsa-miR-31-3p	29974	A1CF	NM_001198820	Targetscan
hsa-miR-31-5p	29974	A1CF	NM_014576	Targetscan
hsa-miR-31-5p	29974	A1CF	NM_138933	Targetscan
hsa-miR-31-5p	29974	A1CF	NM_138932	Targetscan
hsa-miR-31-5p	29974	A1CF	NM_001198819	Targetscan
hsa-miR-31-5p	29974	A1CF	NM_001198818	Targetscan
hsa-miR-31-5p	29974	A1CF	NM_001198820	Targetscan
hsa-miR-340-5p	29974	A1CF	NM_001198819	Eimmo
hsa-miR-340-5p	29974	A1CF	NM_138932	Eimmo
hsa-miR-340-5p	29974	A1CF	NM_001198820	Eimmo
hsa-miR-340-5p	29974	A1CF	NM_014576	Eimmo
hsa-miR-340-5p	29974	A1CF	NM_138933	Eimmo
hsa-miR-340-5p	29974	A1CF	NM_001198818	Eimmo
hsa-miR-340-5p	29974	A1CF	NM_138932	mirDB
hsa-miR-340-5p	29974	A1CF	NM_014576	mirDB
hsa-miR-340-5p	29974	A1CF	NM_138933	mirDB
hsa-miR-340-5p	29974	A1CF	NM_001198818	mirDB
hsa-miR-340-5p	29974	A1CF	NM_001198819	mirDB
hsa-miR-340-5p	29974	A1CF	NM_001198820	mirDB
hsa-miR-340-5p	29974	A1CF	NM_001198820	Targetscan
hsa-miR-340-5p	29974	A1CF	NM_001198819	Targetscan
hsa-miR-340-5p	29974	A1CF	NM_001198818	Targetscan
hsa-miR-340-5p	29974	A1CF	NM_014576	Targetscan
hsa-miR-340-5p	29974	A1CF	NM_138933	Targetscan
hsa-miR-340-5p	29974	A1CF	NM_138932	Targetscan
hsa-miR-99a-5p	29974	A1CF	NM_138932	Targetscan
hsa-let-7e-5p	54715	A2BP1	NM_145893	Miranda
hsa-let-7e-5p	54715	A2BP1	NM_145891	Miranda
hsa-miR-146a-5p	54715	A2BP1	NM_145893	Miranda
hsa-miR-146a-5p	54715	A2BP1	NM_145891	Miranda
hsa-miR-181a-3p	54715	A2BP1	NM_145893	Miranda
hsa-miR-181a-3p	54715	A2BP1	NM_145891	Miranda
hsa-miR-18a-5p	54715	A2BP1	NM_145893	Miranda
hsa-miR-20a-3p	54715	A2BP1	NM_145893	Miranda
hsa-miR-20a-3p	54715	A2BP1	NM_145891	Miranda
hsa-miR-20a-5p	54715	A2BP1	NM_145893	Miranda
hsa-miR-20a-5p	54715	A2BP1	NM_145891	Miranda
hsa-miR-218-5p	54715	A2BP1	NM_145893	Miranda
hsa-miR-218-5p	54715	A2BP1	NM_145891	Miranda
hsa-miR-223-3p	54715	A2BP1	NM_145893	Miranda
hsa-miR-223-3p	54715	A2BP1	NM_145891	Miranda
hsa-miR-31-3p	54715	A2BP1	NM_145893	Miranda
hsa-miR-31-3p	54715	A2BP1	NM_145891	Miranda
hsa-miR-31-3p	54715	A2BP1	NM_145891;NM_145892;NM_145893	PITA
hsa-miR-31-5p	54715	A2BP1	NM_145893	Miranda
hsa-miR-31-5p	54715	A2BP1	NM_145891	Miranda
hsa-miR-31-5p	54715	A2BP1	NM_145891;NM_145892;NM_145893	PITA
hsa-miR-92a-3p	54715	A2BP1	NM_145893	Miranda
hsa-miR-92a-3p	54715	A2BP1	NM_145891	Miranda
hsa-miR-1	87769	A2LD1	NM_033110	Targetscan
hsa-miR-1	87769	A2LD1	NM_001195087	Targetscan
hsa-miR-223-3p	87769	A2LD1	NM_033110	Targetscan
hsa-miR-223-3p	87769	A2LD1	NM_001195087	Targetscan
hsa-miR-497-5p	87769	A2LD1	NM_001195087	Eimmo
hsa-miR-497-5p	87769	A2LD1	NM_033110	Eimmo
hsa-miR-1	2	A2M	NM_000014	Targetscan
hsa-miR-146a-5p	2	A2M	NM_000014	Targetscan
hsa-miR-1	144568	A2ML1	NM_144670	Targetscan
hsa-miR-17-3p	144568	A2ML1	NM_144670	Targetscan
hsa-miR-196b-5p	144568	A2ML1	AK057908	Miranda
hsa-miR-196b-5p	144568	A2ML1	NM_144670	Miranda
hsa-miR-223-3p	144568	A2ML1	AK057908	Miranda
hsa-miR-31-3p	144568	A2ML1	AK057908	Miranda
hsa-miR-31-5p	144568	A2ML1	AK057908	Miranda
hsa-miR-1	53947	A4GALT	NM_017436	Targetscan
hsa-miR-1	51146	A4GNT	NM_016161	Targetscan
hsa-miR-130a-3p	51146	A4GNT	NM_016161	Miranda
hsa-miR-130a-3p	51146	A4GNT	NM_016161	Targetscan
hsa-miR-195-5p	51146	A4GNT	NM_016161	Miranda
hsa-miR-195-5p	51146	A4GNT	NM_016161	Eimmo
hsa-miR-223-3p	51146	A4GNT	NM_016161	Miranda
hsa-miR-497-5p	51146	A4GNT	NM_016161	Miranda
hsa-miR-497-5p	51146	A4GNT	NM_016161	Eimmo
hsa-miR-1	65985	AACS	NM_023928	Targetscan
hsa-miR-146a-5p	65985	AACS	AK022740	Miranda
hsa-miR-146a-5p	65985	AACS	AK304176	Miranda
hsa-miR-218-5p	65985	AACS	NM_023928	Miranda
hsa-miR-218-5p	65985	AACS	BC041000	Miranda
hsa-miR-218-5p	65985	AACS	NM_023928	Eimmo
hsa-miR-218-5p	65985	AACS	NM_023928	Targetscan
hsa-miR-31-3p	65985	AACS	AK022740	Miranda
hsa-miR-31-3p	65985	AACS	AK304176	Miranda
hsa-miR-31-5p	65985	AACS	AK022740	Miranda
hsa-miR-31-5p	65985	AACS	AK304176	Miranda
hsa-miR-92a-3p	65985	AACS	NM_023928	Miranda
hsa-miR-92a-3p	65985	AACS	BC041000	Miranda
hsa-miR-1	13	AADAC	NM_001086	Miranda
hsa-miR-1	13	AADAC	NM_001086	Targetscan
hsa-miR-17-3p	13	AADAC	NM_001086	Miranda
hsa-miR-17-3p	13	AADAC	NM_001086	Targetscan
hsa-miR-20a-3p	13	AADAC	NM_001086	Miranda
hsa-miR-20a-5p	13	AADAC	NM_001086	Miranda
hsa-miR-1	126767	AADACL3	NM_001103170	Miranda
hsa-miR-1	126767	AADACL3	NM_001103170	Targetscan
hsa-miR-1	126767	AADACL3	NM_001103169	Targetscan
hsa-miR-146a-5p	126767	AADACL3	NM_001103170	Targetscan
hsa-miR-146a-5p	126767	AADACL3	NM_001103169	Targetscan
hsa-miR-17-3p	126767	AADACL3	NM_001103170	Miranda
hsa-miR-17-3p	126767	AADACL3	NM_001103170	Targetscan
hsa-miR-17-3p	126767	AADACL3	NM_001103169	Targetscan
hsa-miR-181a-3p	126767	AADACL3	NM_001103170	Targetscan
hsa-miR-181a-3p	126767	AADACL3	NM_001103169	Targetscan
hsa-miR-18a-5p	126767	AADACL3	NM_001103170	Miranda
hsa-miR-20a-3p	126767	AADACL3	NM_001103170	Miranda
hsa-miR-20a-5p	126767	AADACL3	NM_001103170	Miranda
hsa-miR-218-5p	126767	AADACL3	NM_001103170	Targetscan
hsa-miR-218-5p	126767	AADACL3	NM_001103169	Targetscan
hsa-miR-31-3p	126767	AADACL3	NM_001103170	Miranda
hsa-miR-31-3p	126767	AADACL3	NM_001103170	Targetscan
hsa-miR-31-3p	126767	AADACL3	NM_001103169	Targetscan
hsa-miR-31-5p	126767	AADACL3	NM_001103170	Miranda
hsa-miR-31-5p	126767	AADACL3	NM_001103170	Targetscan
hsa-miR-31-5p	126767	AADACL3	NM_001103169	Targetscan
hsa-miR-497-5p	126767	AADACL3	NM_001103170	Miranda
hsa-miR-92a-3p	126767	AADACL3	NM_001103170	Miranda
hsa-miR-1	343066	AADACL4	NM_001013630	Miranda
hsa-miR-1	343066	AADACL4	NM_001013630	Targetscan
hsa-miR-1	51166	AADAT	NM_016228	Targetscan
hsa-miR-1	51166	AADAT	NM_182662	Targetscan
hsa-miR-17-3p	51166	AADAT	NM_016228	Miranda
hsa-miR-17-3p	51166	AADAT	NM_182662	Targetscan
hsa-miR-17-3p	51166	AADAT	NM_016228	Targetscan
hsa-miR-195-5p	51166	AADAT	NM_016228	Miranda
hsa-miR-20a-3p	51166	AADAT	NM_016228	Miranda
hsa-miR-20a-5p	51166	AADAT	NM_016228	Miranda
hsa-miR-340-5p	51166	AADAT	NM_016228	Miranda
hsa-miR-340-5p	51166	AADAT	NM_016228	Targetscan
hsa-miR-340-5p	51166	AADAT	NM_182662	Targetscan
hsa-miR-497-5p	51166	AADAT	NM_016228	Miranda
hsa-miR-92a-3p	51166	AADAT	NM_016228	Miranda
hsa-miR-1	79719	AAGAB	NM_024666	Targetscan
hsa-miR-135b-5p	79719	AAGAB	NM_024666	Miranda
hsa-miR-146a-5p	79719	AAGAB	NM_024666	Targetscan
hsa-miR-18a-5p	79719	AAGAB	NM_024666	Miranda
hsa-miR-18a-5p	79719	AAGAB	NM_024666	Targetscan
hsa-miR-196b-5p	79719	AAGAB	NM_024666	Miranda
hsa-miR-340-5p	79719	AAGAB	NM_024666	Eimmo
hsa-miR-340-5p	79719	AAGAB	NM_024666	Targetscan
hsa-let-7e-5p	22848	AAK1	NM_014911	Eimmo
hsa-miR-1	22848	AAK1	NM_014911	Eimmo
hsa-miR-1	22848	AAK1	NM_014911	Targetscan
hsa-miR-130a-3p	22848	AAK1	NM_014911	Targetscan
hsa-miR-130a-3p	22848	AAK1	NM_014911	PITA
hsa-miR-130a-3p	22848	AAK1	NM_014911	Eimmo
hsa-miR-130a-3p	22848	AAK1	NM_014911	mirDB
hsa-miR-133b	22848	AAK1	NM_014911	Eimmo
hsa-miR-146a-5p	22848	AAK1	NM_014911	Targetscan
hsa-miR-17-3p	22848	AAK1	NM_014911	Eimmo
hsa-miR-17-3p	22848	AAK1	NM_014911	Targetscan
hsa-miR-17-3p	22848	AAK1	NM_014911	PITA
hsa-miR-181a-3p	22848	AAK1	NM_014911	Eimmo
hsa-miR-181a-3p	22848	AAK1	NM_014911	Targetscan
hsa-miR-18a-5p	22848	AAK1	NM_014911	Targetscan
hsa-miR-196b-5p	22848	AAK1	NM_014911	Eimmo
hsa-miR-20a-3p	22848	AAK1	NM_014911	Eimmo
hsa-miR-20a-3p	22848	AAK1	NM_014911	PITA
hsa-miR-20a-5p	22848	AAK1	NM_014911	PITA
hsa-miR-20a-5p	22848	AAK1	NM_014911	Eimmo
hsa-miR-20a-5p	22848	AAK1	NM_014911	mirDB
hsa-miR-223-3p	22848	AAK1	NM_014911	Targetscan
hsa-miR-31-3p	22848	AAK1	NM_014911	Eimmo
hsa-miR-31-3p	22848	AAK1	NM_014911	Targetscan
hsa-miR-31-5p	22848	AAK1	NM_014911	Eimmo
hsa-miR-31-5p	22848	AAK1	NM_014911	Targetscan
hsa-miR-340-5p	22848	AAK1	NM_014911	Targetscan
hsa-miR-497-5p	22848	AAK1	NM_014911	Eimmo
hsa-miR-513a-5p	22848	AAK1	NM_014911	Eimmo
hsa-miR-1	15	AANAT	NM_001088	Targetscan
hsa-miR-1	15	AANAT	NM_001166579	Targetscan
hsa-miR-1	16	AARS	NM_001605	Targetscan
hsa-miR-1	57505	AARS2	NM_020745	Targetscan
hsa-miR-17-3p	57505	AARS2	NM_020745	Miranda
hsa-miR-17-3p	57505	AARS2	NM_020745	Eimmo
hsa-miR-17-3p	57505	AARS2	NM_020745	Targetscan
hsa-miR-20a-3p	57505	AARS2	NM_020745	Miranda
hsa-miR-20a-5p	57505	AARS2	NM_020745	Miranda
hsa-miR-223-3p	57505	AARS2	NM_020745	Miranda
hsa-miR-223-3p	57505	AARS2	NM_020745	Targetscan
hsa-miR-31-3p	57505	AARS2	NM_020745	Miranda
hsa-miR-31-5p	57505	AARS2	NM_020745	Miranda
hsa-let-7e-5p	80755	AARSD1	NM_001142653	Miranda
hsa-miR-1	80755	AARSD1	NM_001142653	Targetscan
hsa-miR-1	80755	AARSD1	NM_001142654	Targetscan
hsa-miR-31-3p	80755	AARSD1	NM_001142653	Miranda
hsa-miR-31-3p	80755	AARSD1	NM_001142653	Targetscan
hsa-miR-31-3p	80755	AARSD1	NM_001142654	Targetscan
hsa-miR-31-5p	80755	AARSD1	NM_001142653	Miranda
hsa-miR-31-5p	80755	AARSD1	NM_001142653	Targetscan
hsa-miR-31-5p	80755	AARSD1	NM_001142654	Targetscan
hsa-miR-340-5p	80755	AARSD1	NM_001142653	Miranda
hsa-miR-340-5p	80755	AARSD1	NM_001142653	Targetscan
hsa-miR-340-5p	80755	AARSD1	NM_001142654	Targetscan
hsa-miR-1	132949	AASDH	BC015096	Miranda
hsa-miR-130a-3p	132949	AASDH	BC015096	Miranda
hsa-miR-181a-3p	132949	AASDH	BC142709	Miranda
hsa-miR-196b-5p	132949	AASDH	BC141824	Miranda
hsa-miR-340-5p	132949	AASDH	BC142709	Miranda
hsa-miR-340-5p	132949	AASDH	NM_181806	Miranda
hsa-miR-340-5p	132949	AASDH	BC015096	Miranda
hsa-miR-1	60496	AASDHPPT	NM_015423	Targetscan
hsa-miR-1246	60496	AASDHPPT	NM_015423	mirDB
hsa-miR-135b-5p	60496	AASDHPPT	AK293362	Miranda
hsa-miR-146a-5p	60496	AASDHPPT	AK293362	Miranda
hsa-miR-181a-3p	60496	AASDHPPT	AK293362	Miranda
hsa-miR-181a-3p	60496	AASDHPPT	NM_015423	Miranda
hsa-miR-181a-3p	60496	AASDHPPT	NM_015423	Targetscan
hsa-miR-181a-3p	60496	AASDHPPT	NM_015423	PITA
hsa-miR-195-5p	60496	AASDHPPT	AK293362	Miranda
hsa-miR-195-5p	60496	AASDHPPT	NM_015423	Miranda
hsa-miR-340-5p	60496	AASDHPPT	AK293362	Miranda
hsa-miR-340-5p	60496	AASDHPPT	NM_015423	Miranda
hsa-miR-340-5p	60496	AASDHPPT	NM_015423	Targetscan
hsa-miR-497-5p	60496	AASDHPPT	AK293362	Miranda
hsa-miR-497-5p	60496	AASDHPPT	NM_015423	Miranda
hsa-let-7e-5p	10157	AASS	NM_005763	Miranda
hsa-let-7e-5p	10157	AASS	NM_005763	Eimmo
hsa-miR-1	10157	AASS	NM_005763	Targetscan
hsa-miR-146a-5p	10157	AASS	NM_005763	Miranda
hsa-miR-146a-5p	10157	AASS	NM_005763	Targetscan
hsa-miR-181a-3p	10157	AASS	NM_005763	Miranda
hsa-miR-181a-3p	10157	AASS	NM_005763	Targetscan
hsa-miR-218-5p	10157	AASS	NM_005763	Miranda
hsa-miR-218-5p	10157	AASS	NM_005763	Targetscan
hsa-miR-223-3p	10157	AASS	NM_005763	Miranda
hsa-miR-223-3p	10157	AASS	NM_005763	Targetscan
hsa-miR-340-5p	10157	AASS	NM_005763	Miranda
hsa-miR-340-5p	10157	AASS	NM_005763	Eimmo
hsa-miR-340-5p	10157	AASS	NM_005763	Targetscan
hsa-miR-497-5p	10157	AASS	NM_005763	Miranda
hsa-miR-1	26574	AATF	NM_012138	Targetscan
hsa-miR-135b-5p	26574	AATF	CR616929	Miranda
hsa-miR-1	9625	AATK	NM_004920	Targetscan
hsa-miR-1	9625	AATK	NM_001080395	Targetscan
hsa-miR-195-5p	9625	AATK	NM_001080395	Miranda
hsa-miR-195-5p	9625	AATK	NM_001080395	PITA
hsa-miR-195-5p	9625	AATK	NM_001080395	Eimmo
hsa-miR-497-5p	9625	AATK	NM_001080395	Miranda
hsa-miR-497-5p	9625	AATK	NM_001080395	PITA
hsa-miR-497-5p	9625	AATK	NM_001080395	Eimmo
hsa-miR-92a-3p	9625	AATK	NM_001080395	Miranda
hsa-miR-92a-3p	9625	AATK	NM_001080395	PITA
hsa-miR-92a-3p	9625	AATK	NM_001080395	Eimmo
hsa-miR-1	18	ABAT	NM_020686	Targetscan
hsa-miR-1	18	ABAT	NM_001127448	Targetscan
hsa-miR-1	18	ABAT	NM_000663	Targetscan
hsa-miR-125b-5p	18	ABAT	NM_020686	Miranda
hsa-miR-135b-5p	18	ABAT	NM_020686	Miranda
hsa-miR-135b-5p	18	ABAT	NM_000663	Eimmo
hsa-miR-135b-5p	18	ABAT	NM_001127448	Eimmo
hsa-miR-135b-5p	18	ABAT	NM_020686	Eimmo
hsa-miR-17-3p	18	ABAT	NM_020686	Miranda
hsa-miR-17-3p	18	ABAT	NM_001127448	Targetscan
hsa-miR-17-3p	18	ABAT	NM_000663	Targetscan
hsa-miR-17-3p	18	ABAT	NM_020686	Targetscan
hsa-miR-20a-3p	18	ABAT	NM_020686	Miranda
hsa-miR-20a-5p	18	ABAT	NM_020686	Miranda
hsa-miR-218-5p	18	ABAT	NM_000663	Eimmo
hsa-miR-218-5p	18	ABAT	NM_001127448	Eimmo
hsa-miR-218-5p	18	ABAT	NM_020686	Eimmo
hsa-miR-218-5p	18	ABAT	NM_000663	Targetscan
hsa-miR-218-5p	18	ABAT	NM_001127448	Targetscan
hsa-miR-218-5p	18	ABAT	NM_020686	Targetscan
hsa-miR-223-3p	18	ABAT	NM_020686	Targetscan
hsa-miR-223-3p	18	ABAT	NM_001127448	Targetscan
hsa-miR-223-3p	18	ABAT	NM_000663	Targetscan
hsa-miR-340-5p	18	ABAT	NM_020686	Miranda
hsa-miR-340-5p	18	ABAT	NM_020686	Eimmo
hsa-miR-340-5p	18	ABAT	NM_000663	Eimmo
hsa-miR-340-5p	18	ABAT	NM_001127448	Eimmo
hsa-miR-340-5p	18	ABAT	NM_020686	Targetscan
hsa-miR-340-5p	18	ABAT	NM_000663	Targetscan
hsa-miR-340-5p	18	ABAT	NM_001127448	Targetscan
hsa-miR-513a-5p	18	ABAT	NM_000663	Eimmo
hsa-miR-513a-5p	18	ABAT	NM_001127448	Eimmo
hsa-miR-513a-5p	18	ABAT	NM_020686	Eimmo
hsa-miR-1	19	ABCA1	NM_005502	Eimmo
hsa-miR-1	19	ABCA1	NM_005502	Targetscan
hsa-miR-130a-3p	19	ABCA1	NM_005502	Miranda
hsa-miR-130a-3p	19	ABCA1	NM_005502	Targetscan
hsa-miR-130a-3p	19	ABCA1	NM_005502	PITA
hsa-miR-130a-3p	19	ABCA1	NM_005502	Eimmo
hsa-miR-135b-5p	19	ABCA1	NM_005502	Miranda
hsa-miR-135b-5p	19	ABCA1	NM_005502	Eimmo
hsa-miR-135b-5p	19	ABCA1	NM_005502	PITA
hsa-miR-17-3p	19	ABCA1	NM_005502	Miranda
hsa-miR-17-3p	19	ABCA1	NM_005502	Eimmo
hsa-miR-17-3p	19	ABCA1	NM_005502	Targetscan
hsa-miR-17-3p	19	ABCA1	NM_005502	PITA
hsa-miR-181a-3p	19	ABCA1	NM_005502	Targetscan
hsa-miR-20a-3p	19	ABCA1	NM_005502	Miranda
hsa-miR-20a-3p	19	ABCA1	NM_005502	Eimmo
hsa-miR-20a-3p	19	ABCA1	NM_005502	PITA
hsa-miR-20a-5p	19	ABCA1	NM_005502	Miranda
hsa-miR-20a-5p	19	ABCA1	NM_005502	PITA
hsa-miR-20a-5p	19	ABCA1	NM_005502	Eimmo
hsa-miR-218-5p	19	ABCA1	NM_005502	Targetscan
hsa-miR-223-3p	19	ABCA1	NM_005502	Miranda
hsa-miR-340-5p	19	ABCA1	NM_005502	Miranda
hsa-miR-340-5p	19	ABCA1	NM_005502	Eimmo
hsa-miR-340-5p	19	ABCA1	NM_005502	Targetscan
hsa-miR-340-5p	19	ABCA1	NM_005502	PITA
hsa-miR-513a-5p	19	ABCA1	NM_005502	Eimmo
hsa-miR-513a-5p	19	ABCA1	NM_005502	Pictar
hsa-miR-99a-5p	19	ABCA1	NM_005502	Miranda
hsa-miR-1	10349	ABCA10	NM_080282	Miranda
hsa-miR-1	10349	ABCA10	NM_080282	Targetscan
hsa-miR-135b-5p	10349	ABCA10	NM_080282	Miranda
hsa-miR-17-3p	10349	ABCA10	NM_080282	Miranda
hsa-miR-17-3p	10349	ABCA10	NM_080282	Targetscan
hsa-miR-20a-3p	10349	ABCA10	NM_080282	Miranda
hsa-miR-20a-5p	10349	ABCA10	NM_080282	Miranda
hsa-miR-1	79963	ABCA11P	NR_002451	Miranda
hsa-miR-195-5p	79963	ABCA11P	NR_002451	Miranda
hsa-miR-195-5p	79963	ABCA11P	BC099730	Miranda
hsa-miR-195-5p	79963	ABCA11P	AK303674	Miranda
hsa-miR-218-5p	79963	ABCA11P	NR_002451	Miranda
hsa-miR-223-3p	79963	ABCA11P	AK303674	Miranda
hsa-miR-497-5p	79963	ABCA11P	NR_002451	Miranda
hsa-miR-497-5p	79963	ABCA11P	BC099730	Miranda
hsa-miR-497-5p	79963	ABCA11P	AK303674	Miranda
hsa-miR-92a-3p	79963	ABCA11P	BC060316	Miranda
hsa-miR-1	26154	ABCA12	NM_173076	Miranda
hsa-miR-1	26154	ABCA12	NM_173076	Targetscan
hsa-miR-1	26154	ABCA12	NM_015657	Targetscan
hsa-miR-17-3p	26154	ABCA12	NM_173076	Miranda
hsa-miR-20a-3p	26154	ABCA12	NM_173076	Miranda
hsa-miR-20a-5p	26154	ABCA12	NM_173076	Miranda
hsa-miR-31-3p	26154	ABCA12	NM_015657	Targetscan
hsa-miR-31-3p	26154	ABCA12	NM_173076	Targetscan
hsa-miR-31-5p	26154	ABCA12	NM_015657	Targetscan
hsa-miR-31-5p	26154	ABCA12	NM_173076	Targetscan
hsa-miR-1	154664	ABCA13	NM_152701	Miranda
hsa-miR-1	154664	ABCA13	NM_152701	Targetscan
hsa-miR-130a-3p	154664	ABCA13	AK131360	Miranda
hsa-miR-133b	154664	ABCA13	AK131360	Miranda
hsa-miR-146a-5p	154664	ABCA13	AK128570	Miranda
hsa-miR-146a-5p	154664	ABCA13	BX647560	Miranda
hsa-miR-17-3p	154664	ABCA13	NM_152701	Targetscan
hsa-miR-181a-3p	154664	ABCA13	NM_152701	Miranda
hsa-miR-181a-3p	154664	ABCA13	BX647560	Miranda
hsa-miR-181a-3p	154664	ABCA13	NM_152701	Targetscan
hsa-miR-195-5p	154664	ABCA13	AK131360	Miranda
hsa-miR-218-5p	154664	ABCA13	NM_152701	Miranda
hsa-miR-218-5p	154664	ABCA13	BX647560	Miranda
hsa-miR-218-5p	154664	ABCA13	NM_152701	Targetscan
hsa-miR-31-3p	154664	ABCA13	BX647560	Miranda
hsa-miR-31-5p	154664	ABCA13	BX647560	Miranda
hsa-miR-340-5p	154664	ABCA13	BX647560	Miranda
hsa-miR-497-5p	154664	ABCA13	AK131360	Miranda
hsa-miR-1	20	ABCA2	NM_212533	Targetscan
hsa-miR-1	20	ABCA2	NM_001606	Targetscan
hsa-miR-133b	20	ABCA2	NM_001606	Eimmo
hsa-miR-133b	20	ABCA2	NM_212533	Eimmo
hsa-miR-17-3p	20	ABCA2	AK308738	Miranda
hsa-miR-20a-3p	20	ABCA2	AK308738	Miranda
hsa-miR-20a-5p	20	ABCA2	AK308738	Miranda
hsa-let-7e-5p	21	ABCA3	AK310864	Miranda
hsa-miR-1	21	ABCA3	NM_001089	Targetscan
hsa-miR-17-3p	21	ABCA3	NM_001089	Miranda
hsa-miR-20a-3p	21	ABCA3	NM_001089	Miranda
hsa-miR-20a-5p	21	ABCA3	NM_001089	Miranda
hsa-miR-1	24	ABCA4	NM_000350	Targetscan
hsa-miR-17-3p	24	ABCA4	AK310492	Miranda
hsa-miR-20a-3p	24	ABCA4	AK310492	Miranda
hsa-miR-20a-5p	24	ABCA4	AK310492	Miranda
hsa-miR-223-3p	24	ABCA4	NM_000350	Miranda
hsa-miR-223-3p	24	ABCA4	NM_000350	Targetscan
hsa-miR-497-5p	24	ABCA4	AK310492	Miranda
hsa-miR-1	23461	ABCA5	NM_172232	Targetscan
hsa-miR-1	23461	ABCA5	NM_018672	Targetscan
hsa-miR-135b-5p	23461	ABCA5	NM_172232	Miranda
hsa-miR-17-3p	23461	ABCA5	NM_018672	Targetscan
hsa-miR-17-3p	23461	ABCA5	NM_172232	Targetscan
hsa-miR-181a-3p	23461	ABCA5	NM_172232	Miranda
hsa-miR-181a-3p	23461	ABCA5	NM_172232	Targetscan
hsa-miR-181a-3p	23461	ABCA5	NM_018672	Targetscan
hsa-miR-195-5p	23461	ABCA5	NM_172232	Miranda
hsa-miR-218-5p	23461	ABCA5	NM_018672	Targetscan
hsa-miR-218-5p	23461	ABCA5	NM_172232	Targetscan
hsa-miR-340-5p	23461	ABCA5	NM_172232	Miranda
hsa-miR-340-5p	23461	ABCA5	NM_172232	Targetscan
hsa-miR-340-5p	23461	ABCA5	NM_018672	Targetscan
hsa-miR-497-5p	23461	ABCA5	NM_172232	Miranda
hsa-let-7e-5p	23460	ABCA6	BC070125	Miranda
hsa-miR-1	23460	ABCA6	CR593055	Miranda
hsa-miR-340-5p	23460	ABCA6	CR593055	Miranda
hsa-miR-1	10347	ABCA7	NM_019112	Targetscan
hsa-miR-223-3p	10347	ABCA7	AL137481	Miranda
hsa-let-7e-5p	10351	ABCA8	BC024003	Miranda
hsa-miR-1	10351	ABCA8	NM_007168	Miranda
hsa-miR-1	10351	ABCA8	NM_007168	Targetscan
hsa-miR-17-3p	10351	ABCA8	NM_007168	Miranda
hsa-miR-20a-3p	10351	ABCA8	NM_007168	Miranda
hsa-miR-20a-5p	10351	ABCA8	NM_007168	Miranda
hsa-miR-218-5p	10351	ABCA8	BC024003	Miranda
hsa-miR-223-3p	10351	ABCA8	AK304286	Miranda
hsa-miR-340-5p	10351	ABCA8	NM_007168	Miranda
hsa-miR-1	10350	ABCA9	NM_080283	Targetscan
hsa-miR-125b-5p	10350	ABCA9	BC062472	Miranda
hsa-miR-135b-5p	10350	ABCA9	NM_080283	Miranda
hsa-miR-146a-5p	10350	ABCA9	NM_080283	Targetscan
hsa-miR-18a-5p	10350	ABCA9	NM_080283	Miranda
hsa-miR-18a-5p	10350	ABCA9	NM_080283	Targetscan
hsa-miR-340-5p	10350	ABCA9	NM_080283	Targetscan
hsa-miR-1	5243	ABCB1	NM_000927	Targetscan
hsa-miR-181a-3p	5243	ABCB1	NM_000927	Miranda
hsa-miR-223-3p	5243	ABCB1	NM_000927	Miranda
hsa-miR-223-3p	5243	ABCB1	NM_000927	Targetscan
hsa-miR-340-5p	5243	ABCB1	NM_000927	Targetscan
hsa-miR-1	23456	ABCB10	NM_012089	Targetscan
hsa-miR-146a-5p	23456	ABCB10	NM_012089	Targetscan
hsa-miR-181a-3p	23456	ABCB10	NM_012089	Miranda
hsa-miR-181a-3p	23456	ABCB10	NM_012089	Targetscan
hsa-miR-340-5p	23456	ABCB10	NM_012089	Miranda
hsa-miR-340-5p	23456	ABCB10	NM_012089	Eimmo
hsa-miR-340-5p	23456	ABCB10	NM_012089	Targetscan
hsa-miR-1	8647	ABCB11	NM_003742	Targetscan
hsa-miR-181a-3p	8647	ABCB11	NM_003742	Miranda
hsa-miR-1	5244	ABCB4	BC020618	Miranda
hsa-miR-218-5p	5244	ABCB4	BC020618	Miranda
hsa-let-7e-5p	340273	ABCB5	NM_001163941	Miranda
hsa-let-7e-5p	340273	ABCB5	NM_001163993	Miranda
hsa-let-7e-5p	340273	ABCB5	NM_001163942	Miranda
hsa-miR-1	340273	ABCB5	NM_178559	Targetscan
hsa-miR-1	340273	ABCB5	NM_001163941	Targetscan
hsa-miR-1	340273	ABCB5	NM_001163942	Targetscan
hsa-miR-1	340273	ABCB5	NM_001163993	Targetscan
hsa-miR-130a-3p	340273	ABCB5	NM_001163993	Miranda
hsa-miR-130a-3p	340273	ABCB5	NM_001163993	Targetscan
hsa-miR-146a-5p	340273	ABCB5	NM_001163941	Miranda
hsa-miR-17-3p	340273	ABCB5	NM_001163941	Miranda
hsa-miR-17-3p	340273	ABCB5	NM_178559	Targetscan
hsa-miR-17-3p	340273	ABCB5	NM_001163941	Targetscan
hsa-miR-17-3p	340273	ABCB5	NM_001163942	Targetscan
hsa-miR-18a-5p	340273	ABCB5	NM_001163993	Miranda
hsa-miR-195-5p	340273	ABCB5	NM_001163941	Miranda
hsa-miR-196b-5p	340273	ABCB5	NM_001163993	Miranda
hsa-miR-20a-3p	340273	ABCB5	NM_001163941	Miranda
hsa-miR-20a-3p	340273	ABCB5	NM_001163942	mirDB
hsa-miR-20a-5p	340273	ABCB5	NM_001163941	Miranda
hsa-miR-340-5p	340273	ABCB5	NM_001163941	Miranda
hsa-miR-340-5p	340273	ABCB5	NM_001163993	Miranda
hsa-miR-340-5p	340273	ABCB5	NM_001163993	Targetscan
hsa-miR-340-5p	340273	ABCB5	NM_001163941	Targetscan
hsa-miR-340-5p	340273	ABCB5	NM_178559	Targetscan
hsa-miR-497-5p	340273	ABCB5	NM_001163941	Miranda
hsa-miR-497-5p	340273	ABCB5	NM_178559	mirDB
hsa-miR-497-5p	340273	ABCB5	NM_001163941	mirDB
hsa-miR-513a-5p	340273	ABCB5	NM_001163993	mirDB
hsa-miR-1	22	ABCB7	NM_004299	Miranda
hsa-miR-1	22	ABCB7	NM_004299	Eimmo
hsa-miR-1	22	ABCB7	NM_004299	Pictar
hsa-miR-1	22	ABCB7	NM_001271696	Pictar
hsa-miR-1	22	ABCB7	NM_001271697	Pictar
hsa-miR-1	22	ABCB7	NM_001271699	Pictar
hsa-miR-1	22	ABCB7	NM_001271698	Pictar
hsa-miR-1	22	ABCB7	NM_004299	Targetscan
hsa-miR-1	22	ABCB7	NM_004299	PITA
hsa-miR-130a-3p	22	ABCB7	NM_004299	Miranda
hsa-miR-130a-3p	22	ABCB7	NM_004299	Targetscan
hsa-miR-130a-3p	22	ABCB7	NM_004299	PITA
hsa-miR-130a-3p	22	ABCB7	NM_004299	Eimmo
hsa-miR-1	11194	ABCB8	NM_007188	Targetscan
hsa-miR-18a-5p	11194	ABCB8	NM_007188	Targetscan
hsa-let-7e-5p	23457	ABCB9	NM_019625	Miranda
hsa-let-7e-5p	23457	ABCB9	CR614075	Miranda
hsa-let-7e-5p	23457	ABCB9	NM_203444	Eimmo
hsa-let-7e-5p	23457	ABCB9	NM_019625	Eimmo
hsa-let-7e-5p	23457	ABCB9	NM_019624	Eimmo
hsa-let-7e-5p	23457	ABCB9	NM_019624;NM_019625;NM_203444	PITA
hsa-miR-1	23457	ABCB9	NM_019625	Targetscan
hsa-miR-1	23457	ABCB9	NM_019624	Targetscan
hsa-miR-1	23457	ABCB9	NM_203444	Targetscan
hsa-miR-17-3p	23457	ABCB9	NM_019625	Miranda
hsa-miR-17-3p	23457	ABCB9	AK027624	Miranda
hsa-miR-17-3p	23457	ABCB9	CR614075	Miranda
hsa-miR-17-3p	23457	ABCB9	NM_019625	Targetscan
hsa-miR-17-3p	23457	ABCB9	NM_019624	Targetscan
hsa-miR-17-3p	23457	ABCB9	NM_203444	Targetscan
hsa-miR-196b-5p	23457	ABCB9	NM_019625	Miranda
hsa-miR-196b-5p	23457	ABCB9	CR614075	Miranda
hsa-miR-196b-5p	23457	ABCB9	NM_203444	Eimmo
hsa-miR-196b-5p	23457	ABCB9	NM_019625	Eimmo
hsa-miR-196b-5p	23457	ABCB9	NM_019624	Eimmo
hsa-miR-196b-5p	23457	ABCB9	NM_019624;NM_019625;NM_203444	PITA
hsa-miR-20a-3p	23457	ABCB9	NM_019625	Miranda
hsa-miR-20a-3p	23457	ABCB9	AK027624	Miranda
hsa-miR-20a-3p	23457	ABCB9	CR614075	Miranda
hsa-miR-20a-5p	23457	ABCB9	NM_019625	Miranda
hsa-miR-20a-5p	23457	ABCB9	AK027624	Miranda
hsa-miR-20a-5p	23457	ABCB9	CR614075	Miranda
hsa-miR-31-3p	23457	ABCB9	NM_019625	Miranda
hsa-miR-31-3p	23457	ABCB9	CR614075	Miranda
hsa-miR-31-3p	23457	ABCB9	NM_019625	Eimmo
hsa-miR-31-3p	23457	ABCB9	NM_019624	Eimmo
hsa-miR-31-3p	23457	ABCB9	NM_203444	Eimmo
hsa-miR-31-3p	23457	ABCB9	NM_019624	Targetscan
hsa-miR-31-3p	23457	ABCB9	NM_019625	Targetscan
hsa-miR-31-3p	23457	ABCB9	NM_203444	Targetscan
hsa-miR-31-5p	23457	ABCB9	NM_019625	Miranda
hsa-miR-31-5p	23457	ABCB9	CR614075	Miranda
hsa-miR-31-5p	23457	ABCB9	NM_019625	Eimmo
hsa-miR-31-5p	23457	ABCB9	NM_019624	Eimmo
hsa-miR-31-5p	23457	ABCB9	NM_203444	Eimmo
hsa-miR-31-5p	23457	ABCB9	NM_019625	Pictar
hsa-miR-31-5p	23457	ABCB9	NM_019624	Pictar
hsa-miR-31-5p	23457	ABCB9	NM_203444	Pictar
hsa-miR-31-5p	23457	ABCB9	NM_001243014	Pictar
hsa-miR-31-5p	23457	ABCB9	NM_001243013	Pictar
hsa-miR-31-5p	23457	ABCB9	NM_019624	Targetscan
hsa-miR-31-5p	23457	ABCB9	NM_019625	Targetscan
hsa-miR-31-5p	23457	ABCB9	NM_203444	Targetscan
hsa-miR-513a-5p	23457	ABCB9	NM_019625	Eimmo
hsa-miR-513a-5p	23457	ABCB9	NM_019624	Eimmo
hsa-miR-513a-5p	23457	ABCB9	NM_203444	Eimmo
hsa-miR-513a-5p	23457	ABCB9	NM_019625	Pictar
hsa-miR-513a-5p	23457	ABCB9	NM_019624	Pictar
hsa-miR-513a-5p	23457	ABCB9	NM_203444	Pictar
hsa-miR-513a-5p	23457	ABCB9	NM_001243014	Pictar
hsa-miR-513a-5p	23457	ABCB9	NM_001243013	Pictar
hsa-miR-1	4363	ABCC1	NM_004996	Miranda
hsa-miR-1	4363	ABCC1	NM_004996	Targetscan
hsa-miR-1	4363	ABCC1	NM_019899	Targetscan
hsa-miR-1	4363	ABCC1	NM_019898	Targetscan
hsa-miR-1	4363	ABCC1	NM_019900	Targetscan
hsa-miR-1	4363	ABCC1	NM_019862	Targetscan
hsa-miR-133b	4363	ABCC1	NM_019898	Eimmo
hsa-miR-133b	4363	ABCC1	NM_004996	Eimmo
hsa-miR-133b	4363	ABCC1	NM_019899	Eimmo
hsa-miR-133b	4363	ABCC1	NM_019900	Eimmo
hsa-miR-133b	4363	ABCC1	NM_019862	Eimmo
hsa-miR-146a-5p	4363	ABCC1	NM_019862	Targetscan
hsa-miR-146a-5p	4363	ABCC1	NM_004996	Targetscan
hsa-miR-146a-5p	4363	ABCC1	NM_019898	Targetscan
hsa-miR-146a-5p	4363	ABCC1	NM_019899	Targetscan
hsa-miR-146a-5p	4363	ABCC1	NM_019900	Targetscan
hsa-let-7e-5p	89845	ABCC10	AK000002	Miranda
hsa-let-7e-5p	89845	ABCC10	NM_001198934	Eimmo
hsa-let-7e-5p	89845	ABCC10	NM_033450	Eimmo
hsa-miR-1	89845	ABCC10	AK000002	Miranda
hsa-miR-1	89845	ABCC10	NM_001198934	Targetscan
hsa-miR-1	89845	ABCC10	NM_033450	Targetscan
hsa-miR-146a-5p	89845	ABCC10	NM_001198934	Targetscan
hsa-miR-146a-5p	89845	ABCC10	NM_033450	Targetscan
hsa-miR-1	94160	ABCC12	NM_033226	Targetscan
hsa-miR-17-3p	94160	ABCC12	NM_033226	Miranda
hsa-miR-20a-3p	94160	ABCC12	NM_033226	Miranda
hsa-miR-20a-5p	94160	ABCC12	NM_033226	Miranda
hsa-miR-340-5p	94160	ABCC12	NM_033226	Miranda
hsa-let-7e-5p	150000	ABCC13	AF418600	Miranda
hsa-miR-135b-5p	150000	ABCC13	AF418600	Miranda
hsa-miR-146a-5p	150000	ABCC13	AF418600	Miranda
hsa-miR-223-3p	150000	ABCC13	NR_003087	Miranda
hsa-miR-340-5p	150000	ABCC13	AF418600	Miranda
hsa-miR-340-5p	150000	ABCC13	NR_003087	Miranda
hsa-miR-92a-3p	150000	ABCC13	AF418600	Miranda
hsa-let-7e-5p	1244	ABCC2	NM_000392	Miranda
hsa-miR-1	1244	ABCC2	NM_000392	Targetscan
hsa-miR-340-5p	1244	ABCC2	NM_000392	Miranda
hsa-miR-340-5p	1244	ABCC2	NM_000392	Targetscan
hsa-miR-1	8714	ABCC3	NM_003786	Targetscan
hsa-miR-130a-3p	8714	ABCC3	NM_003786	Miranda
hsa-miR-18a-5p	8714	ABCC3	NM_003786	Miranda
hsa-miR-18a-5p	8714	ABCC3	NM_003786	Targetscan
hsa-miR-1	10257	ABCC4	NM_005845	Miranda
hsa-miR-1	10257	ABCC4	NM_005845	Targetscan
hsa-miR-1	10257	ABCC4	NM_001105515	Targetscan
hsa-miR-125b-5p	10257	ABCC4	NM_005845	Miranda
hsa-miR-125b-5p	10257	ABCC4	NM_005845	Eimmo
hsa-miR-133b	10257	ABCC4	NM_001105515	Miranda
hsa-miR-146a-5p	10257	ABCC4	NM_005845	Targetscan
hsa-miR-218-5p	10257	ABCC4	NM_005845	Miranda
hsa-miR-218-5p	10257	ABCC4	NM_005845	Targetscan
hsa-miR-218-5p	10257	ABCC4	NM_005845	PITA
hsa-miR-340-5p	10257	ABCC4	NM_001105515	Miranda
hsa-let-7e-5p	10057	ABCC5	NM_005688	Miranda
hsa-let-7e-5p	10057	ABCC5	NM_001023587	Miranda
hsa-let-7e-5p	10057	ABCC5	AY754876	Miranda
hsa-let-7e-5p	10057	ABCC5	NM_005688	Eimmo
hsa-let-7e-5p	10057	ABCC5	NM_005688	PITA
hsa-miR-1	10057	ABCC5	NM_005688	Miranda
hsa-miR-1	10057	ABCC5	BC142670	Miranda
hsa-miR-1	10057	ABCC5	NM_001023587	Miranda
hsa-miR-1	10057	ABCC5	AY754876	Miranda
hsa-miR-1	10057	ABCC5	NM_001023587	Targetscan
hsa-miR-1	10057	ABCC5	NM_005688	Targetscan
hsa-miR-1	10057	ABCC5	NM_001023587	PITA
hsa-miR-125b-5p	10057	ABCC5	NM_005688	Miranda
hsa-miR-125b-5p	10057	ABCC5	NM_001023587	Miranda
hsa-miR-125b-5p	10057	ABCC5	AY754876	Miranda
hsa-miR-125b-5p	10057	ABCC5	NM_005688	Eimmo
hsa-miR-125b-5p	10057	ABCC5	NM_005688	PITA
hsa-miR-130a-3p	10057	ABCC5	NM_005688	Miranda
hsa-miR-130a-3p	10057	ABCC5	NM_005688	Targetscan
hsa-miR-130a-3p	10057	ABCC5	NM_005688	PITA
hsa-miR-130a-3p	10057	ABCC5	NM_005688	Eimmo
hsa-miR-146a-5p	10057	ABCC5	NM_005688	Miranda
hsa-miR-146a-5p	10057	ABCC5	NM_005688	Targetscan
hsa-miR-146a-5p	10057	ABCC5	NM_005688	PITA
hsa-miR-17-3p	10057	ABCC5	NM_005688	Miranda
hsa-miR-17-3p	10057	ABCC5	NM_005688	Targetscan
hsa-miR-181a-3p	10057	ABCC5	NM_001023587	Eimmo
hsa-miR-18a-5p	10057	ABCC5	BC142670	Miranda
hsa-miR-195-5p	10057	ABCC5	NM_005688	Miranda
hsa-miR-195-5p	10057	ABCC5	NM_005688	Eimmo
hsa-miR-20a-3p	10057	ABCC5	NM_005688	Miranda
hsa-miR-20a-5p	10057	ABCC5	NM_005688	Miranda
hsa-miR-223-3p	10057	ABCC5	NM_005688	Miranda
hsa-miR-340-5p	10057	ABCC5	NM_005688	Miranda
hsa-miR-340-5p	10057	ABCC5	BC142670	Miranda
hsa-miR-340-5p	10057	ABCC5	NM_001023587	Miranda
hsa-miR-340-5p	10057	ABCC5	AY754876	Miranda
hsa-miR-340-5p	10057	ABCC5	NM_005688	Eimmo
hsa-miR-340-5p	10057	ABCC5	NM_005688	Targetscan
hsa-miR-340-5p	10057	ABCC5	NM_005688	PITA
hsa-miR-497-5p	10057	ABCC5	NM_005688	Miranda
hsa-miR-497-5p	10057	ABCC5	NM_005688	Eimmo
hsa-miR-497-5p	10057	ABCC5	NM_005688	Pictar
hsa-miR-1	368	ABCC6	NM_001079528	Targetscan
hsa-miR-1	368	ABCC6	NM_001171	Targetscan
hsa-miR-218-5p	368	ABCC6	NM_001171	Targetscan
hsa-let-7e-5p	653190	ABCC6P1	NR_003569	Miranda
hsa-miR-1	653190	ABCC6P1	NR_003569	Miranda
hsa-miR-130a-3p	653190	ABCC6P1	NR_003569	Miranda
hsa-miR-196b-5p	653190	ABCC6P1	NR_003569	Miranda
hsa-miR-223-3p	653190	ABCC6P1	NR_003569	Miranda
hsa-miR-340-5p	653190	ABCC6P1	NR_003569	Miranda
hsa-miR-1	6833	ABCC8	NM_000352	Targetscan
hsa-miR-1	10060	ABCC9	NM_020297	Targetscan
hsa-miR-130a-3p	10060	ABCC9	BC033804	Miranda
hsa-miR-130a-3p	10060	ABCC9	AK056519	Miranda
hsa-miR-17-3p	10060	ABCC9	NM_020297	Miranda
hsa-miR-17-3p	10060	ABCC9	BC033804	Miranda
hsa-miR-17-3p	10060	ABCC9	AK056519	Miranda
hsa-miR-18a-5p	10060	ABCC9	NM_020297	Miranda
hsa-miR-18a-5p	10060	ABCC9	NM_020297	Targetscan
hsa-miR-20a-3p	10060	ABCC9	NM_020297	Miranda
hsa-miR-20a-3p	10060	ABCC9	BC033804	Miranda
hsa-miR-20a-3p	10060	ABCC9	AK056519	Miranda
hsa-miR-20a-5p	10060	ABCC9	NM_020297	Miranda
hsa-miR-20a-5p	10060	ABCC9	BC033804	Miranda
hsa-miR-20a-5p	10060	ABCC9	AK056519	Miranda
hsa-miR-223-3p	10060	ABCC9	BC033804	Miranda
hsa-miR-223-3p	10060	ABCC9	AK056519	Miranda
hsa-miR-340-5p	10060	ABCC9	NM_020297	Miranda
hsa-miR-340-5p	10060	ABCC9	NM_020297	Eimmo
hsa-miR-340-5p	10060	ABCC9	NM_020297	Targetscan
hsa-miR-1	215	ABCD1	NM_000033	Targetscan
hsa-miR-31-3p	215	ABCD1	NM_000033	Targetscan
hsa-miR-31-5p	215	ABCD1	NM_000033	Targetscan
hsa-miR-1	225	ABCD2	NM_005164	Targetscan
hsa-miR-130a-3p	225	ABCD2	NM_005164	Miranda
hsa-miR-133b	225	ABCD2	NM_005164	Miranda
hsa-miR-146a-5p	225	ABCD2	NM_005164	Miranda
hsa-miR-146a-5p	225	ABCD2	NM_005164	Targetscan
hsa-miR-17-3p	225	ABCD2	NM_005164	Miranda
hsa-miR-17-3p	225	ABCD2	NM_005164	Targetscan
hsa-miR-18a-5p	225	ABCD2	NM_005164	Targetscan
hsa-miR-20a-3p	225	ABCD2	NM_005164	Miranda
hsa-miR-20a-5p	225	ABCD2	NM_005164	Miranda
hsa-miR-218-5p	225	ABCD2	NM_005164	Miranda
hsa-miR-218-5p	225	ABCD2	NM_005164	Targetscan
hsa-miR-340-5p	225	ABCD2	NM_005164	Miranda
hsa-miR-340-5p	225	ABCD2	NM_005164	Eimmo
hsa-miR-340-5p	225	ABCD2	NM_005164	Targetscan
hsa-miR-1	5825	ABCD3	NM_002858	Miranda
hsa-miR-1	5825	ABCD3	NM_001122674	Targetscan
hsa-miR-1	5825	ABCD3	NM_002858	Targetscan
hsa-miR-130a-3p	5825	ABCD3	NM_002858	Eimmo
hsa-miR-135b-5p	5825	ABCD3	NM_002858	Miranda
hsa-miR-135b-5p	5825	ABCD3	NM_002858	Eimmo
hsa-miR-146a-5p	5825	ABCD3	NM_002858	Miranda
hsa-miR-17-3p	5825	ABCD3	NM_001122674	Miranda
hsa-miR-17-3p	5825	ABCD3	NM_001122674	Targetscan
hsa-miR-181a-3p	5825	ABCD3	NM_002858	Miranda
hsa-miR-20a-3p	5825	ABCD3	NM_001122674	Miranda
hsa-miR-20a-5p	5825	ABCD3	NM_001122674	Miranda
hsa-miR-340-5p	5825	ABCD3	NM_002858	Targetscan
hsa-miR-1	5826	ABCD4	NM_005050	Targetscan
hsa-miR-218-5p	5826	ABCD4	NM_005050	Miranda
hsa-miR-218-5p	5826	ABCD4	NM_005050	Targetscan
hsa-miR-223-3p	5826	ABCD4	AK297934	Miranda
hsa-miR-223-3p	5826	ABCD4	NM_005050	Miranda
hsa-miR-223-3p	5826	ABCD4	NM_005050	PITA
hsa-miR-223-3p	5826	ABCD4	NM_005050	Targetscan
hsa-miR-31-3p	5826	ABCD4	NM_005050	Targetscan
hsa-miR-31-5p	5826	ABCD4	NM_005050	Targetscan
hsa-miR-1	6059	ABCE1	NM_002940	Targetscan
hsa-miR-1	6059	ABCE1	NM_001040876	Targetscan
hsa-miR-130a-3p	6059	ABCE1	NM_002940	Miranda
hsa-miR-130a-3p	6059	ABCE1	AK315198	Miranda
hsa-miR-130a-3p	6059	ABCE1	NM_002940	Targetscan
hsa-miR-130a-3p	6059	ABCE1	NM_001040876	Targetscan
hsa-miR-135b-5p	6059	ABCE1	NM_002940	Miranda
hsa-miR-135b-5p	6059	ABCE1	AK315198	Miranda
hsa-miR-135b-5p	6059	ABCE1	NM_002940	Eimmo
hsa-miR-135b-5p	6059	ABCE1	NM_001040876	Eimmo
hsa-miR-135b-5p	6059	ABCE1	NM_001040876;NM_002940	PITA
hsa-miR-17-3p	6059	ABCE1	NM_002940	Targetscan
hsa-miR-17-3p	6059	ABCE1	NM_001040876	Targetscan
hsa-miR-1	23	ABCF1	NM_001025091	Targetscan
hsa-miR-1	23	ABCF1	NM_001090	Targetscan
hsa-miR-146a-5p	23	ABCF1	NM_001025091	Targetscan
hsa-miR-146a-5p	23	ABCF1	NM_001090	Targetscan
hsa-miR-18a-5p	23	ABCF1	NM_001025091	Targetscan
hsa-miR-18a-5p	23	ABCF1	NM_001090	Targetscan
hsa-miR-195-5p	23	ABCF1	NM_001025091	Miranda
hsa-miR-195-5p	23	ABCF1	NM_001090	Eimmo
hsa-miR-195-5p	23	ABCF1	NM_001025091	Eimmo
hsa-miR-497-5p	23	ABCF1	NM_001025091	Miranda
hsa-miR-1	10061	ABCF2	NM_007189	Targetscan
hsa-miR-1	10061	ABCF2	NM_005692	Targetscan
hsa-miR-195-5p	10061	ABCF2	NM_005692	Miranda
hsa-miR-195-5p	10061	ABCF2	NM_005692	PITA
hsa-miR-195-5p	10061	ABCF2	NM_005692	Eimmo
hsa-miR-497-5p	10061	ABCF2	NM_005692	Miranda
hsa-miR-497-5p	10061	ABCF2	NM_005692	PITA
hsa-miR-92a-3p	10061	ABCF2	NM_007189	Eimmo
hsa-miR-1	55324	ABCF3	NM_018358	Targetscan
hsa-miR-195-5p	55324	ABCF3	NM_018358	Eimmo
hsa-let-7e-5p	9619	ABCG1	BX537588	Miranda
hsa-miR-1	9619	ABCG1	NM_207628	Targetscan
hsa-miR-1	9619	ABCG1	NM_207627	Targetscan
hsa-miR-1	9619	ABCG1	NM_207629	Targetscan
hsa-miR-1	9619	ABCG1	NM_207174	Targetscan
hsa-miR-1	9619	ABCG1	NM_004915	Targetscan
hsa-miR-1	9619	ABCG1	NM_016818	Targetscan
hsa-miR-133b	9619	ABCG1	BX537588	Miranda
hsa-miR-340-5p	9619	ABCG1	BX537588	Miranda
hsa-let-7e-5p	9429	ABCG2	BC092408	Miranda
hsa-miR-1	9429	ABCG2	NM_004827	Targetscan
hsa-miR-146a-5p	9429	ABCG2	NM_004827	Miranda
hsa-miR-146a-5p	9429	ABCG2	BC092408	Miranda
hsa-miR-146a-5p	9429	ABCG2	NM_004827	Targetscan
hsa-miR-17-3p	9429	ABCG2	NM_004827	Miranda
hsa-miR-17-3p	9429	ABCG2	BC092408	Miranda
hsa-miR-17-3p	9429	ABCG2	NM_004827	Targetscan
hsa-miR-196b-5p	9429	ABCG2	BC092408	Miranda
hsa-miR-20a-3p	9429	ABCG2	NM_004827	Miranda
hsa-miR-20a-3p	9429	ABCG2	BC092408	Miranda
hsa-miR-20a-5p	9429	ABCG2	NM_004827	Miranda
hsa-miR-20a-5p	9429	ABCG2	BC092408	Miranda
hsa-miR-218-5p	9429	ABCG2	NM_004827	Miranda
hsa-miR-218-5p	9429	ABCG2	BC092408	Miranda
hsa-miR-218-5p	9429	ABCG2	NM_004827	Targetscan
hsa-miR-31-3p	9429	ABCG2	NM_004827	Targetscan
hsa-miR-31-5p	9429	ABCG2	NM_004827	Targetscan
hsa-miR-340-5p	9429	ABCG2	NM_004827	Targetscan
hsa-let-7e-5p	64137	ABCG4	NM_022169	Miranda
hsa-miR-1	64137	ABCG4	NM_022169	Targetscan
hsa-miR-1	64137	ABCG4	NM_001142505	Targetscan
hsa-miR-133b	64137	ABCG4	NM_022169	Eimmo
hsa-miR-133b	64137	ABCG4	NM_001142505	Eimmo
hsa-miR-17-3p	64137	ABCG4	NM_022169	Miranda
hsa-miR-17-3p	64137	ABCG4	NM_022169	Eimmo
hsa-miR-17-3p	64137	ABCG4	NM_001142505	Eimmo
hsa-miR-17-3p	64137	ABCG4	NM_022169	Targetscan
hsa-miR-17-3p	64137	ABCG4	NM_001142505	Targetscan
hsa-miR-17-3p	64137	ABCG4	NM_022169	PITA
hsa-miR-195-5p	64137	ABCG4	NM_022169	Miranda
hsa-miR-195-5p	64137	ABCG4	NM_022169	PITA
hsa-miR-195-5p	64137	ABCG4	NM_022169	Eimmo
hsa-miR-195-5p	64137	ABCG4	NM_001142505	Eimmo
hsa-miR-20a-3p	64137	ABCG4	NM_022169	Miranda
hsa-miR-20a-3p	64137	ABCG4	NM_022169	Eimmo
hsa-miR-20a-3p	64137	ABCG4	NM_001142505	Eimmo
hsa-miR-20a-3p	64137	ABCG4	NM_022169	PITA
hsa-miR-20a-5p	64137	ABCG4	NM_022169	Miranda
hsa-miR-20a-5p	64137	ABCG4	NM_022169	PITA
hsa-miR-20a-5p	64137	ABCG4	NM_022169	Eimmo
hsa-miR-20a-5p	64137	ABCG4	NM_001142505	Eimmo
hsa-miR-218-5p	64137	ABCG4	NM_022169	Miranda
hsa-miR-218-5p	64137	ABCG4	NM_022169	Eimmo
hsa-miR-218-5p	64137	ABCG4	NM_001142505	Eimmo
hsa-miR-218-5p	64137	ABCG4	NM_001142505	Targetscan
hsa-miR-218-5p	64137	ABCG4	NM_022169	Targetscan
hsa-miR-218-5p	64137	ABCG4	NM_022169	PITA
hsa-miR-223-3p	64137	ABCG4	NM_022169	Miranda
hsa-miR-223-3p	64137	ABCG4	NM_022169	PITA
hsa-miR-223-3p	64137	ABCG4	NM_022169	Targetscan
hsa-miR-223-3p	64137	ABCG4	NM_001142505	Targetscan
hsa-miR-31-3p	64137	ABCG4	NM_022169	Targetscan
hsa-miR-31-3p	64137	ABCG4	NM_001142505	Targetscan
hsa-miR-31-5p	64137	ABCG4	NM_022169	Targetscan
hsa-miR-31-5p	64137	ABCG4	NM_001142505	Targetscan
hsa-miR-340-5p	64137	ABCG4	NM_022169	Miranda
hsa-miR-497-5p	64137	ABCG4	NM_022169	Miranda
hsa-miR-497-5p	64137	ABCG4	NM_022169	PITA
hsa-miR-497-5p	64137	ABCG4	NM_022169	Eimmo
hsa-miR-497-5p	64137	ABCG4	NM_001142505	Eimmo
hsa-miR-497-5p	64137	ABCG4	NM_001142505	Pictar
hsa-miR-497-5p	64137	ABCG4	NM_022169	Pictar
hsa-miR-92a-3p	64137	ABCG4	NM_022169	Miranda
hsa-miR-92a-3p	64137	ABCG4	NM_022169	PITA
hsa-miR-1	64240	ABCG5	NM_022436	Targetscan
hsa-miR-135b-5p	64240	ABCG5	NM_022436	Miranda
hsa-miR-181a-3p	64240	ABCG5	NM_022436	Miranda
hsa-miR-181a-3p	64240	ABCG5	NM_022436	Targetscan
hsa-miR-1	64241	ABCG8	NM_022437	Targetscan
hsa-miR-340-5p	64241	ABCG8	NM_022437	Miranda
hsa-miR-1	84696	ABHD1	AK074615	Miranda
hsa-miR-125b-5p	84696	ABHD1	BC056403	Miranda
hsa-miR-130a-3p	84696	ABHD1	AK074615	Miranda
hsa-miR-135b-5p	84696	ABHD1	BC056403	Miranda
hsa-miR-195-5p	84696	ABHD1	BC056403	Miranda
hsa-miR-31-3p	84696	ABHD1	BC056403	Miranda
hsa-miR-31-5p	84696	ABHD1	BC056403	Miranda
hsa-miR-340-5p	84696	ABHD1	AK074615	Miranda
hsa-miR-497-5p	84696	ABHD1	BC056403	Miranda
hsa-miR-1	55347	ABHD10	NM_018394	Targetscan
hsa-miR-130a-3p	55347	ABHD10	NM_018394	Miranda
hsa-miR-130a-3p	55347	ABHD10	NM_018394	Targetscan
hsa-miR-196b-5p	55347	ABHD10	NM_018394	Miranda
hsa-miR-223-3p	55347	ABHD10	NM_018394	Miranda
hsa-miR-31-3p	55347	ABHD10	NM_018394	Miranda
hsa-miR-31-5p	55347	ABHD10	NM_018394	Miranda
hsa-miR-340-5p	55347	ABHD10	NM_018394	Miranda
hsa-miR-340-5p	55347	ABHD10	NM_018394	Eimmo
hsa-miR-340-5p	55347	ABHD10	NM_018394	mirDB
hsa-miR-340-5p	55347	ABHD10	NM_018394	Targetscan
hsa-miR-497-5p	55347	ABHD10	NM_018394	Eimmo
hsa-miR-1	83451	ABHD11	NM_148913	Targetscan
hsa-miR-1	83451	ABHD11	NM_148912	Targetscan
hsa-miR-1	83451	ABHD11	NM_001145364	Targetscan
hsa-miR-17-3p	83451	ABHD11	NM_148912	Miranda
hsa-miR-17-3p	83451	ABHD11	NM_148912	Targetscan
hsa-miR-17-3p	83451	ABHD11	NM_148913	Targetscan
hsa-miR-17-3p	83451	ABHD11	NM_001145364	Targetscan
hsa-miR-20a-3p	83451	ABHD11	NM_148912	Miranda
hsa-miR-20a-5p	83451	ABHD11	NM_148912	Miranda
hsa-miR-1	26090	ABHD12	NM_001042472	Targetscan
hsa-miR-1	26090	ABHD12	NM_015600	Targetscan
hsa-miR-130a-3p	26090	ABHD12	NM_015600	Miranda
hsa-miR-18a-5p	26090	ABHD12	CR624082	Miranda
hsa-miR-18a-5p	26090	ABHD12	NM_015600	Miranda
hsa-miR-18a-5p	26090	ABHD12	NM_001042472	Targetscan
hsa-miR-1	145447	ABHD12B	AY311399	Miranda
hsa-miR-1	145447	ABHD12B	NM_001206673	Targetscan
hsa-miR-1	145447	ABHD12B	NM_181814	Targetscan
hsa-miR-133b	145447	ABHD12B	NM_181814	Miranda
hsa-miR-181a-3p	145447	ABHD12B	NM_181814	Eimmo
hsa-miR-181a-3p	145447	ABHD12B	NM_181533	Eimmo
hsa-miR-31-3p	145447	ABHD12B	AY311399	Miranda
hsa-miR-31-3p	145447	ABHD12B	NM_181814	Miranda
hsa-miR-31-3p	145447	ABHD12B	NM_181814	Targetscan
hsa-miR-31-3p	145447	ABHD12B	NM_001206673	Targetscan
hsa-miR-31-5p	145447	ABHD12B	AY311399	Miranda
hsa-miR-31-5p	145447	ABHD12B	NM_181814	Miranda
hsa-miR-31-5p	145447	ABHD12B	NM_181814	Targetscan
hsa-miR-31-5p	145447	ABHD12B	NM_001206673	Targetscan
hsa-miR-340-5p	145447	ABHD12B	NM_001206673	Targetscan
hsa-miR-340-5p	145447	ABHD12B	NM_181814	Targetscan
hsa-miR-1	84945	ABHD13	NM_032859	Targetscan
hsa-miR-17-3p	84945	ABHD13	NM_032859	Targetscan
hsa-miR-181a-3p	84945	ABHD13	NM_032859	Miranda
hsa-miR-181a-3p	84945	ABHD13	NM_032859	Eimmo
hsa-miR-181a-3p	84945	ABHD13	NM_032859	Targetscan
hsa-miR-181a-3p	84945	ABHD13	NM_032859	PITA
hsa-miR-18a-5p	84945	ABHD13	NM_032859	Targetscan
hsa-miR-195-5p	84945	ABHD13	NM_032859	Miranda
hsa-miR-195-5p	84945	ABHD13	NM_032859	Eimmo
hsa-miR-20a-3p	84945	ABHD13	NM_032859	Miranda
hsa-miR-20a-5p	84945	ABHD13	NM_032859	Miranda
hsa-miR-223-3p	84945	ABHD13	NM_032859	Miranda
hsa-miR-223-3p	84945	ABHD13	NM_032859	Eimmo
hsa-miR-223-3p	84945	ABHD13	NM_032859	Targetscan
hsa-miR-31-3p	84945	ABHD13	NM_032859	Targetscan
hsa-miR-31-5p	84945	ABHD13	NM_032859	Targetscan
hsa-miR-340-5p	84945	ABHD13	NM_032859	Miranda
hsa-miR-340-5p	84945	ABHD13	NM_032859	Eimmo
hsa-miR-340-5p	84945	ABHD13	NM_032859	mirDB
hsa-miR-340-5p	84945	ABHD13	NM_032859	Targetscan
hsa-miR-497-5p	84945	ABHD13	NM_032859	Miranda
hsa-miR-497-5p	84945	ABHD13	NM_032859	Eimmo
hsa-miR-92a-3p	84945	ABHD13	NM_032859	Eimmo
hsa-miR-1	25864	ABHD14A	NM_015407	Targetscan
hsa-let-7e-5p	84836	ABHD14B	NM_001146314	Miranda
hsa-let-7e-5p	84836	ABHD14B	AK298813	Miranda
hsa-miR-1	84836	ABHD14B	NM_001146314	Targetscan
hsa-miR-1	84836	ABHD14B	NM_032750	Targetscan
hsa-miR-125b-5p	84836	ABHD14B	NM_001146314	Miranda
hsa-miR-125b-5p	84836	ABHD14B	AK298813	Miranda
hsa-miR-18a-5p	84836	ABHD14B	NM_001146314	Miranda
hsa-miR-1	116236	ABHD15	NM_198147	Targetscan
hsa-miR-17-3p	116236	ABHD15	NM_198147	Miranda
hsa-miR-17-3p	116236	ABHD15	NM_198147	Eimmo
hsa-miR-17-3p	116236	ABHD15	NM_198147	Targetscan
hsa-miR-181a-3p	116236	ABHD15	NM_198147	Miranda
hsa-miR-181a-3p	116236	ABHD15	NM_198147	Targetscan
hsa-miR-20a-3p	116236	ABHD15	NM_198147	Miranda
hsa-miR-20a-3p	116236	ABHD15	NM_198147	Eimmo
hsa-miR-20a-5p	116236	ABHD15	NM_198147	Miranda
hsa-miR-20a-5p	116236	ABHD15	NM_198147	Eimmo
hsa-miR-218-5p	116236	ABHD15	NM_198147	Miranda
hsa-miR-218-5p	116236	ABHD15	NM_198147	Targetscan
hsa-miR-223-3p	116236	ABHD15	NM_198147	Targetscan
hsa-miR-31-3p	116236	ABHD15	NM_198147	Targetscan
hsa-miR-31-5p	116236	ABHD15	NM_198147	Targetscan
hsa-miR-1	7920	ABHD16A	NM_001177515	Targetscan
hsa-miR-1	7920	ABHD16A	NM_021160	Targetscan
hsa-let-7e-5p	58489	ABHD17C	NM_021214	Eimmo
hsa-miR-17-3p	58489	ABHD17C	NM_021214	Pictar
hsa-miR-340-5p	58489	ABHD17C	NM_021214	Eimmo
hsa-miR-513a-5p	58489	ABHD17C	NM_021214	Eimmo
hsa-miR-513a-5p	58489	ABHD17C	NM_021214	Pictar
hsa-miR-1	11057	ABHD2	NM_007011	Eimmo
hsa-miR-1	11057	ABHD2	NM_152924	Eimmo
hsa-miR-1	11057	ABHD2	NM_152924	Targetscan
hsa-miR-1	11057	ABHD2	NM_007011	Targetscan
hsa-miR-1	11057	ABHD2	NM_007011;NM_152924	PITA
hsa-miR-1246	11057	ABHD2	NM_007011;NM_152924	PITA
hsa-miR-125b-5p	11057	ABHD2	AK296827	Miranda
hsa-miR-125b-5p	11057	ABHD2	NM_007011	Eimmo
hsa-miR-125b-5p	11057	ABHD2	NM_152924	Eimmo
hsa-miR-146a-5p	11057	ABHD2	NM_152924	Targetscan
hsa-miR-146a-5p	11057	ABHD2	NM_007011	Targetscan
hsa-miR-17-3p	11057	ABHD2	NM_007011	Eimmo
hsa-miR-17-3p	11057	ABHD2	NM_152924	Eimmo
hsa-miR-17-3p	11057	ABHD2	NM_152924	Targetscan
hsa-miR-17-3p	11057	ABHD2	NM_007011	Targetscan
hsa-miR-17-3p	11057	ABHD2	NM_007011;NM_152924	PITA
hsa-miR-195-5p	11057	ABHD2	NM_007011	Eimmo
hsa-miR-195-5p	11057	ABHD2	NM_152924	Eimmo
hsa-miR-20a-3p	11057	ABHD2	NM_007011	Eimmo
hsa-miR-20a-3p	11057	ABHD2	NM_152924	Eimmo
hsa-miR-20a-3p	11057	ABHD2	NM_007011;NM_152924	PITA
hsa-miR-20a-5p	11057	ABHD2	NM_007011;NM_152924	PITA
hsa-miR-20a-5p	11057	ABHD2	NM_007011	Eimmo
hsa-miR-20a-5p	11057	ABHD2	NM_152924	Eimmo
hsa-miR-223-3p	11057	ABHD2	NM_007011	Targetscan
hsa-miR-223-3p	11057	ABHD2	NM_152924	Targetscan
hsa-miR-31-3p	11057	ABHD2	NM_007011	Eimmo
hsa-miR-31-3p	11057	ABHD2	NM_152924	Eimmo
hsa-miR-31-3p	11057	ABHD2	NM_007011	Targetscan
hsa-miR-31-3p	11057	ABHD2	NM_152924	Targetscan
hsa-miR-31-5p	11057	ABHD2	NM_007011	Eimmo
hsa-miR-31-5p	11057	ABHD2	NM_152924	Eimmo
hsa-miR-31-5p	11057	ABHD2	NM_007011	Targetscan
hsa-miR-31-5p	11057	ABHD2	NM_152924	Targetscan
hsa-miR-497-5p	11057	ABHD2	NM_007011	Eimmo
hsa-miR-497-5p	11057	ABHD2	NM_152924	Eimmo
hsa-miR-497-5p	11057	ABHD2	NM_152924	mirDB
hsa-miR-497-5p	11057	ABHD2	NM_007011	mirDB
hsa-miR-513a-5p	11057	ABHD2	NM_007011	Eimmo
hsa-miR-513a-5p	11057	ABHD2	NM_152924	Eimmo
hsa-miR-642b-3p	11057	ABHD2	NM_007011	Eimmo
hsa-miR-642b-3p	11057	ABHD2	NM_152924	Eimmo
hsa-miR-642b-3p	11057	ABHD2	NM_007011	mirDB
hsa-miR-642b-3p	11057	ABHD2	NM_152924	mirDB
hsa-miR-1	171586	ABHD3	NM_138340	Miranda
hsa-miR-1	171586	ABHD3	NM_138340	Eimmo
hsa-miR-1	171586	ABHD3	NM_138340	Targetscan
hsa-miR-1	171586	ABHD3	NM_138340	PITA
hsa-miR-125b-5p	171586	ABHD3	NM_138340	Miranda
hsa-miR-125b-5p	171586	ABHD3	NM_138340	Eimmo
hsa-miR-125b-5p	171586	ABHD3	NM_138340	Pictar
hsa-miR-125b-5p	171586	ABHD3	NM_138340	PITA
hsa-miR-130a-3p	171586	ABHD3	NM_138340	Miranda
hsa-miR-130a-3p	171586	ABHD3	NM_138340	Targetscan
hsa-miR-130a-3p	171586	ABHD3	NM_138340	PITA
hsa-miR-130a-3p	171586	ABHD3	NM_138340	Eimmo
hsa-miR-130a-3p	171586	ABHD3	NM_138340	mirDB
hsa-miR-17-3p	171586	ABHD3	NM_138340	Miranda
hsa-miR-17-3p	171586	ABHD3	CR605248	Miranda
hsa-miR-181a-3p	171586	ABHD3	CR605248	Miranda
hsa-miR-20a-3p	171586	ABHD3	NM_138340	Miranda
hsa-miR-20a-3p	171586	ABHD3	CR605248	Miranda
hsa-miR-20a-5p	171586	ABHD3	NM_138340	Miranda
hsa-miR-20a-5p	171586	ABHD3	CR605248	Miranda
hsa-miR-223-3p	171586	ABHD3	NM_138340	Miranda
hsa-miR-340-5p	171586	ABHD3	NM_138340	Miranda
hsa-miR-340-5p	171586	ABHD3	NM_138340	Eimmo
hsa-miR-340-5p	171586	ABHD3	NM_138340	Targetscan
hsa-miR-92a-3p	171586	ABHD3	NM_138340	Miranda
hsa-miR-1	63874	ABHD4	NM_022060	Targetscan
hsa-miR-135b-5p	63874	ABHD4	AK293198	Miranda
hsa-miR-18a-5p	63874	ABHD4	NM_022060	Miranda
hsa-miR-218-5p	63874	ABHD4	NM_022060	Miranda
hsa-miR-218-5p	63874	ABHD4	AK293198	Miranda
hsa-miR-31-3p	63874	ABHD4	NM_022060	Targetscan
hsa-miR-31-5p	63874	ABHD4	NM_022060	Targetscan
hsa-miR-99a-5p	63874	ABHD4	AK298127	Miranda
hsa-miR-99a-5p	63874	ABHD4	AK293198	Miranda
hsa-miR-1	51099	ABHD5	NM_016006	Targetscan
hsa-miR-133b	51099	ABHD5	NM_016006	Eimmo
hsa-miR-135b-5p	51099	ABHD5	NM_016006	Miranda
hsa-miR-17-3p	51099	ABHD5	NM_016006	Miranda
hsa-miR-17-3p	51099	ABHD5	NM_016006	Eimmo
hsa-miR-17-3p	51099	ABHD5	NM_016006	Targetscan
hsa-miR-181a-3p	51099	ABHD5	NM_016006	Miranda
hsa-miR-181a-3p	51099	ABHD5	NM_016006	Targetscan
hsa-miR-195-5p	51099	ABHD5	NM_016006	Miranda
hsa-miR-20a-3p	51099	ABHD5	NM_016006	Miranda
hsa-miR-20a-3p	51099	ABHD5	NM_016006	Eimmo
hsa-miR-20a-5p	51099	ABHD5	NM_016006	Miranda
hsa-miR-20a-5p	51099	ABHD5	NM_016006	Eimmo
hsa-miR-218-5p	51099	ABHD5	NM_016006	Miranda
hsa-miR-218-5p	51099	ABHD5	NM_016006	Targetscan
hsa-miR-497-5p	51099	ABHD5	NM_016006	Miranda
hsa-miR-497-5p	51099	ABHD5	NM_016006	Eimmo
hsa-miR-513a-5p	51099	ABHD5	NM_016006	Eimmo
hsa-miR-1	57406	ABHD6	CR589982	Miranda
hsa-miR-1	57406	ABHD6	NM_020676	Miranda
hsa-miR-1	57406	ABHD6	NM_020676	Targetscan
hsa-miR-125b-5p	57406	ABHD6	CR589982	Miranda
hsa-miR-125b-5p	57406	ABHD6	NM_020676	Miranda
hsa-miR-125b-5p	57406	ABHD6	NM_020676	Eimmo
hsa-miR-125b-5p	57406	ABHD6	NM_020676	PITA
hsa-miR-133b	57406	ABHD6	CR589982	Miranda
hsa-miR-133b	57406	ABHD6	NM_020676	Miranda
hsa-miR-513a-5p	57406	ABHD6	NM_020676	Eimmo
hsa-miR-513a-5p	57406	ABHD6	NM_020676	Pictar
hsa-miR-1	79575	ABHD8	NM_024527	Targetscan
hsa-miR-1	10006	ABI1	NM_001012751	Targetscan
hsa-miR-1	10006	ABI1	NM_001012752	Targetscan
hsa-miR-1	10006	ABI1	NM_001012750	Targetscan
hsa-miR-1	10006	ABI1	NM_001178122	Targetscan
hsa-miR-1	10006	ABI1	NM_005470	Targetscan
hsa-miR-1	10006	ABI1	NM_001178125	Targetscan
hsa-miR-1	10006	ABI1	NM_001178124	Targetscan
hsa-miR-1	10006	ABI1	NM_001178123	Targetscan
hsa-miR-1	10006	ABI1	NM_001178120	Targetscan
hsa-miR-1	10006	ABI1	NM_001178121	Targetscan
hsa-miR-1	10006	ABI1	NM_001178116	Targetscan
hsa-miR-1	10006	ABI1	NM_001178119	Targetscan
hsa-miR-17-3p	10006	ABI1	NM_001012750	Miranda
hsa-miR-17-3p	10006	ABI1	NM_001012750	Eimmo
hsa-miR-17-3p	10006	ABI1	NM_005470	Eimmo
hsa-miR-17-3p	10006	ABI1	NM_001178121	Eimmo
hsa-miR-17-3p	10006	ABI1	NM_001012751	Eimmo
hsa-miR-17-3p	10006	ABI1	NM_001178116	Eimmo
hsa-miR-17-3p	10006	ABI1	NM_001178124	Eimmo
hsa-miR-17-3p	10006	ABI1	NM_001178119	Eimmo
hsa-miR-17-3p	10006	ABI1	NM_001178125	Eimmo
hsa-miR-17-3p	10006	ABI1	NM_001178120	Eimmo
hsa-miR-17-3p	10006	ABI1	NM_001012752	Eimmo
hsa-miR-17-3p	10006	ABI1	NM_001178122	Eimmo
hsa-miR-17-3p	10006	ABI1	NM_001178123	Eimmo
hsa-miR-17-3p	10006	ABI1	NM_001012751	Targetscan
hsa-miR-17-3p	10006	ABI1	NM_001012752	Targetscan
hsa-miR-17-3p	10006	ABI1	NM_001012750	Targetscan
hsa-miR-17-3p	10006	ABI1	NM_005470	Targetscan
hsa-miR-17-3p	10006	ABI1	NM_001178121	Targetscan
hsa-miR-17-3p	10006	ABI1	NM_001178124	Targetscan
hsa-miR-17-3p	10006	ABI1	NM_001178123	Targetscan
hsa-miR-17-3p	10006	ABI1	NM_001178122	Targetscan
hsa-miR-17-3p	10006	ABI1	NM_001178119	Targetscan
hsa-miR-17-3p	10006	ABI1	NM_001178116	Targetscan
hsa-miR-17-3p	10006	ABI1	NM_001178120	Targetscan
hsa-miR-17-3p	10006	ABI1	NM_001178125	Targetscan
hsa-miR-181a-3p	10006	ABI1	NM_001012750	Miranda
hsa-miR-181a-3p	10006	ABI1	NM_001012750	Eimmo
hsa-miR-181a-3p	10006	ABI1	NM_005470	Eimmo
hsa-miR-181a-3p	10006	ABI1	NM_001178121	Eimmo
hsa-miR-181a-3p	10006	ABI1	NM_001012751	Eimmo
hsa-miR-181a-3p	10006	ABI1	NM_001178116	Eimmo
hsa-miR-181a-3p	10006	ABI1	NM_001178124	Eimmo
hsa-miR-181a-3p	10006	ABI1	NM_001178119	Eimmo
hsa-miR-181a-3p	10006	ABI1	NM_001178125	Eimmo
hsa-miR-181a-3p	10006	ABI1	NM_001178120	Eimmo
hsa-miR-181a-3p	10006	ABI1	NM_001012752	Eimmo
hsa-miR-181a-3p	10006	ABI1	NM_001178122	Eimmo
hsa-miR-181a-3p	10006	ABI1	NM_001178123	Eimmo
hsa-miR-181a-3p	10006	ABI1	NM_001012752	Targetscan
hsa-miR-181a-3p	10006	ABI1	NM_001012751	Targetscan
hsa-miR-181a-3p	10006	ABI1	NM_001012750	Targetscan
hsa-miR-181a-3p	10006	ABI1	NM_005470	Targetscan
hsa-miR-181a-3p	10006	ABI1	NM_001178125	Targetscan
hsa-miR-181a-3p	10006	ABI1	NM_001178120	Targetscan
hsa-miR-181a-3p	10006	ABI1	NM_001178124	Targetscan
hsa-miR-181a-3p	10006	ABI1	NM_001178116	Targetscan
hsa-miR-181a-3p	10006	ABI1	NM_001178119	Targetscan
hsa-miR-181a-3p	10006	ABI1	NM_001178122	Targetscan
hsa-miR-181a-3p	10006	ABI1	NM_001178121	Targetscan
hsa-miR-181a-3p	10006	ABI1	NM_001178123	Targetscan
hsa-miR-181a-3p	10006	ABI1	NM_001012750;NM_001012751;NM_001012752;NM_005470	PITA
hsa-miR-18a-5p	10006	ABI1	NM_001012750	Miranda
hsa-miR-20a-3p	10006	ABI1	NM_001012750	Miranda
hsa-miR-20a-3p	10006	ABI1	NM_001012750	Eimmo
hsa-miR-20a-3p	10006	ABI1	NM_005470	Eimmo
hsa-miR-20a-3p	10006	ABI1	NM_001178121	Eimmo
hsa-miR-20a-3p	10006	ABI1	NM_001012751	Eimmo
hsa-miR-20a-3p	10006	ABI1	NM_001178116	Eimmo
hsa-miR-20a-3p	10006	ABI1	NM_001178124	Eimmo
hsa-miR-20a-3p	10006	ABI1	NM_001178119	Eimmo
hsa-miR-20a-3p	10006	ABI1	NM_001178125	Eimmo
hsa-miR-20a-3p	10006	ABI1	NM_001178120	Eimmo
hsa-miR-20a-3p	10006	ABI1	NM_001012752	Eimmo
hsa-miR-20a-3p	10006	ABI1	NM_001178122	Eimmo
hsa-miR-20a-3p	10006	ABI1	NM_001178123	Eimmo
hsa-miR-20a-5p	10006	ABI1	NM_001012750	Miranda
hsa-miR-20a-5p	10006	ABI1	NM_001012750	Eimmo
hsa-miR-20a-5p	10006	ABI1	NM_005470	Eimmo
hsa-miR-20a-5p	10006	ABI1	NM_001178121	Eimmo
hsa-miR-20a-5p	10006	ABI1	NM_001012751	Eimmo
hsa-miR-20a-5p	10006	ABI1	NM_001178116	Eimmo
hsa-miR-20a-5p	10006	ABI1	NM_001178124	Eimmo
hsa-miR-20a-5p	10006	ABI1	NM_001178119	Eimmo
hsa-miR-20a-5p	10006	ABI1	NM_001178125	Eimmo
hsa-miR-20a-5p	10006	ABI1	NM_001178120	Eimmo
hsa-miR-20a-5p	10006	ABI1	NM_001012752	Eimmo
hsa-miR-20a-5p	10006	ABI1	NM_001178122	Eimmo
hsa-miR-20a-5p	10006	ABI1	NM_001178123	Eimmo
hsa-miR-340-5p	10006	ABI1	NM_001012750	Miranda
hsa-miR-340-5p	10006	ABI1	NM_001012750	Eimmo
hsa-miR-340-5p	10006	ABI1	NM_005470	Eimmo
hsa-miR-340-5p	10006	ABI1	NM_001178121	Eimmo
hsa-miR-340-5p	10006	ABI1	NM_001178125	Eimmo
hsa-miR-340-5p	10006	ABI1	NM_001178120	Eimmo
hsa-miR-340-5p	10006	ABI1	NM_001178123	Eimmo
hsa-miR-340-5p	10006	ABI1	NM_001012751	Eimmo
hsa-miR-340-5p	10006	ABI1	NM_001178116	Eimmo
hsa-miR-340-5p	10006	ABI1	NM_001178124	Eimmo
hsa-miR-340-5p	10006	ABI1	NM_001178119	Eimmo
hsa-miR-340-5p	10006	ABI1	NM_001012752	Eimmo
hsa-miR-340-5p	10006	ABI1	NM_001178122	Eimmo
hsa-miR-340-5p	10006	ABI1	NM_001178121	Pictar
hsa-miR-340-5p	10006	ABI1	NM_001012751	Pictar
hsa-miR-340-5p	10006	ABI1	NM_001178122	Pictar
hsa-miR-340-5p	10006	ABI1	NM_001178120	Pictar
hsa-miR-340-5p	10006	ABI1	NM_001012752	Pictar
hsa-miR-340-5p	10006	ABI1	NM_001012750	Pictar
hsa-miR-340-5p	10006	ABI1	NM_005470	Pictar
hsa-miR-340-5p	10006	ABI1	NM_001178124	Pictar
hsa-miR-340-5p	10006	ABI1	NM_001178119	Pictar
hsa-miR-340-5p	10006	ABI1	NM_001178123	Pictar
hsa-miR-340-5p	10006	ABI1	NM_001178116	Pictar
hsa-miR-340-5p	10006	ABI1	NM_001178125	Pictar
hsa-miR-340-5p	10006	ABI1	NM_005470	Targetscan
hsa-miR-340-5p	10006	ABI1	NM_001012750	Targetscan
hsa-miR-340-5p	10006	ABI1	NM_001012751	Targetscan
hsa-miR-340-5p	10006	ABI1	NM_001012752	Targetscan
hsa-miR-340-5p	10006	ABI1	NM_001178121	Targetscan
hsa-miR-340-5p	10006	ABI1	NM_001178116	Targetscan
hsa-miR-340-5p	10006	ABI1	NM_001178122	Targetscan
hsa-miR-340-5p	10006	ABI1	NM_001178119	Targetscan
hsa-miR-340-5p	10006	ABI1	NM_001178120	Targetscan
hsa-miR-340-5p	10006	ABI1	NM_001178124	Targetscan
hsa-miR-340-5p	10006	ABI1	NM_001178125	Targetscan
hsa-miR-340-5p	10006	ABI1	NM_001178123	Targetscan
hsa-miR-92a-3p	10006	ABI1	NM_001012750	Miranda
hsa-miR-1	10152	ABI2	NM_005759	Miranda
hsa-miR-1	10152	ABI2	NM_005759	Targetscan
hsa-miR-146a-5p	10152	ABI2	NM_005759	Targetscan
hsa-miR-17-3p	10152	ABI2	NM_005759	Miranda
hsa-miR-17-3p	10152	ABI2	NM_005759	Eimmo
hsa-miR-17-3p	10152	ABI2	NM_005759	Targetscan
hsa-miR-181a-3p	10152	ABI2	NM_005759	Targetscan
hsa-miR-195-5p	10152	ABI2	NM_005759	Miranda
hsa-miR-195-5p	10152	ABI2	AK316000	Miranda
hsa-miR-195-5p	10152	ABI2	NM_005759	Eimmo
hsa-miR-196b-5p	10152	ABI2	NM_005759	Miranda
hsa-miR-196b-5p	10152	ABI2	AK316000	Miranda
hsa-miR-20a-3p	10152	ABI2	NM_005759	Miranda
hsa-miR-20a-3p	10152	ABI2	NM_005759	Eimmo
hsa-miR-20a-5p	10152	ABI2	NM_005759	Miranda
hsa-miR-20a-5p	10152	ABI2	NM_005759	Eimmo
hsa-miR-223-3p	10152	ABI2	NM_005759	Miranda
hsa-miR-223-3p	10152	ABI2	NM_005759	Targetscan
hsa-miR-340-5p	10152	ABI2	NM_005759	Eimmo
hsa-miR-340-5p	10152	ABI2	NM_005759	Targetscan
hsa-miR-497-5p	10152	ABI2	NM_005759	Miranda
hsa-miR-497-5p	10152	ABI2	AK316000	Miranda
hsa-miR-497-5p	10152	ABI2	NM_005759	Eimmo
hsa-miR-92a-3p	10152	ABI2	NM_005759	Miranda
hsa-miR-1	51225	ABI3	NM_016428	Targetscan
hsa-miR-1	51225	ABI3	NM_001135186	Targetscan
hsa-miR-195-5p	51225	ABI3	NM_016428	Miranda
hsa-miR-497-5p	51225	ABI3	NM_016428	Miranda
hsa-let-7e-5p	25890	ABI3BP	NM_015429	Miranda
hsa-miR-1	25890	ABI3BP	NM_015429	Targetscan
hsa-miR-130a-3p	25890	ABI3BP	AK025204	Miranda
hsa-miR-135b-5p	25890	ABI3BP	AL833204	Miranda
hsa-miR-146a-5p	25890	ABI3BP	AK025204	Miranda
hsa-miR-181a-3p	25890	ABI3BP	NM_015429	Miranda
hsa-miR-181a-3p	25890	ABI3BP	AK025204	Miranda
hsa-miR-181a-3p	25890	ABI3BP	NM_015429	Eimmo
hsa-miR-181a-3p	25890	ABI3BP	NM_015429	Targetscan
hsa-miR-181a-3p	25890	ABI3BP	NM_015429	PITA
hsa-miR-18a-5p	25890	ABI3BP	AK025204	Miranda
hsa-miR-195-5p	25890	ABI3BP	AL833204	Miranda
hsa-miR-195-5p	25890	ABI3BP	AK025204	Miranda
hsa-miR-196b-5p	25890	ABI3BP	AL833204	Miranda
hsa-miR-218-5p	25890	ABI3BP	AK025204	Miranda
hsa-miR-218-5p	25890	ABI3BP	NM_015429	Eimmo
hsa-miR-218-5p	25890	ABI3BP	NM_015429	Targetscan
hsa-miR-340-5p	25890	ABI3BP	NM_015429	Miranda
hsa-miR-340-5p	25890	ABI3BP	NM_015429	Eimmo
hsa-miR-340-5p	25890	ABI3BP	NM_015429	Targetscan
hsa-miR-497-5p	25890	ABI3BP	AL833204	Miranda
hsa-miR-92a-3p	25890	ABI3BP	NM_015429	Miranda
hsa-miR-92a-3p	25890	ABI3BP	NM_015429	Eimmo
hsa-miR-1	25	ABL1	NM_007313	Targetscan
hsa-miR-1	25	ABL1	NM_005157	Targetscan
hsa-miR-17-3p	25	ABL1	NM_005157	Miranda
hsa-miR-18a-5p	25	ABL1	NM_005157	Targetscan
hsa-miR-18a-5p	25	ABL1	NM_007313	Targetscan
hsa-miR-196b-5p	25	ABL1	NM_005157	Miranda
hsa-let-7e-5p	27	ABL2	NM_001168239	Eimmo
hsa-let-7e-5p	27	ABL2	NM_001168236	Eimmo
hsa-let-7e-5p	27	ABL2	NM_007314	Eimmo
hsa-let-7e-5p	27	ABL2	NM_001136000	Eimmo
hsa-let-7e-5p	27	ABL2	NM_001168237	Eimmo
hsa-let-7e-5p	27	ABL2	NM_005158	Eimmo
hsa-let-7e-5p	27	ABL2	NM_001168238	Eimmo
hsa-let-7e-5p	27	ABL2	NM_001100108;NM_005158;NM_007314	PITA
hsa-miR-1	27	ABL2	NM_001168238	Targetscan
hsa-miR-1	27	ABL2	NM_001168239	Targetscan
hsa-miR-1	27	ABL2	NM_001168236	Targetscan
hsa-miR-1	27	ABL2	NM_001168237	Targetscan
hsa-miR-1	27	ABL2	NM_005158	Targetscan
hsa-miR-1	27	ABL2	NM_007314	Targetscan
hsa-miR-1	27	ABL2	NM_001136000	Targetscan
hsa-miR-1	27	ABL2	NM_001136001	Targetscan
hsa-miR-1	27	ABL2	NM_001100108;NM_005158;NM_007314	PITA
hsa-miR-125b-5p	27	ABL2	NM_001136000	Eimmo
hsa-miR-125b-5p	27	ABL2	NM_001168237	Eimmo
hsa-miR-125b-5p	27	ABL2	NM_005158	Eimmo
hsa-miR-125b-5p	27	ABL2	NM_001168238	Eimmo
hsa-miR-125b-5p	27	ABL2	NM_001168239	Eimmo
hsa-miR-125b-5p	27	ABL2	NM_001168236	Eimmo
hsa-miR-125b-5p	27	ABL2	NM_007314	Eimmo
hsa-miR-125b-5p	27	ABL2	NM_001100108;NM_005158;NM_007314	PITA
hsa-miR-133b	27	ABL2	NM_001168239	Eimmo
hsa-miR-133b	27	ABL2	NM_001168236	Eimmo
hsa-miR-133b	27	ABL2	NM_007314	Eimmo
hsa-miR-133b	27	ABL2	NM_001136000	Eimmo
hsa-miR-133b	27	ABL2	NM_001168237	Eimmo
hsa-miR-133b	27	ABL2	NM_005158	Eimmo
hsa-miR-133b	27	ABL2	NM_001168238	Eimmo
hsa-miR-146a-5p	27	ABL2	NM_001136000	Eimmo
hsa-miR-146a-5p	27	ABL2	NM_001168237	Eimmo
hsa-miR-146a-5p	27	ABL2	NM_005158	Eimmo
hsa-miR-146a-5p	27	ABL2	NM_001168238	Eimmo
hsa-miR-146a-5p	27	ABL2	NM_001168239	Eimmo
hsa-miR-146a-5p	27	ABL2	NM_001168236	Eimmo
hsa-miR-146a-5p	27	ABL2	NM_007314	Eimmo
hsa-miR-146a-5p	27	ABL2	NM_001168237	Targetscan
hsa-miR-146a-5p	27	ABL2	NM_001168236	Targetscan
hsa-miR-146a-5p	27	ABL2	NM_005158	Targetscan
hsa-miR-146a-5p	27	ABL2	NM_001136000	Targetscan
hsa-miR-146a-5p	27	ABL2	NM_001168238	Targetscan
hsa-miR-146a-5p	27	ABL2	NM_001168239	Targetscan
hsa-miR-146a-5p	27	ABL2	NM_007314	Targetscan
hsa-miR-146a-5p	27	ABL2	NM_001100108;NM_005158;NM_007314	PITA
hsa-miR-17-3p	27	ABL2	AK225255	Miranda
hsa-miR-17-3p	27	ABL2	NM_001136000	Eimmo
hsa-miR-17-3p	27	ABL2	NM_001168237	Eimmo
hsa-miR-17-3p	27	ABL2	NM_005158	Eimmo
hsa-miR-17-3p	27	ABL2	NM_001168238	Eimmo
hsa-miR-17-3p	27	ABL2	NM_001168239	Eimmo
hsa-miR-17-3p	27	ABL2	NM_001168236	Eimmo
hsa-miR-17-3p	27	ABL2	NM_007314	Eimmo
hsa-miR-17-3p	27	ABL2	NM_005158	Targetscan
hsa-miR-17-3p	27	ABL2	NM_007314	Targetscan
hsa-miR-17-3p	27	ABL2	NM_001168239	Targetscan
hsa-miR-17-3p	27	ABL2	NM_001168238	Targetscan
hsa-miR-17-3p	27	ABL2	NM_001168236	Targetscan
hsa-miR-17-3p	27	ABL2	NM_001168237	Targetscan
hsa-miR-17-3p	27	ABL2	NM_001136000	Targetscan
hsa-miR-17-3p	27	ABL2	NM_001100108;NM_005158;NM_007314	PITA
hsa-miR-181a-3p	27	ABL2	NM_001136000	Eimmo
hsa-miR-181a-3p	27	ABL2	NM_001168237	Eimmo
hsa-miR-181a-3p	27	ABL2	NM_005158	Eimmo
hsa-miR-181a-3p	27	ABL2	NM_001168238	Eimmo
hsa-miR-181a-3p	27	ABL2	NM_001168239	Eimmo
hsa-miR-181a-3p	27	ABL2	NM_001168236	Eimmo
hsa-miR-181a-3p	27	ABL2	NM_007314	Eimmo
hsa-miR-181a-3p	27	ABL2	NM_007314	Targetscan
hsa-miR-181a-3p	27	ABL2	NM_005158	Targetscan
hsa-miR-181a-3p	27	ABL2	NM_001168236	Targetscan
hsa-miR-181a-3p	27	ABL2	NM_001168237	Targetscan
hsa-miR-181a-3p	27	ABL2	NM_001168238	Targetscan
hsa-miR-181a-3p	27	ABL2	NM_001136000	Targetscan
hsa-miR-181a-3p	27	ABL2	NM_001168239	Targetscan
hsa-miR-18a-5p	27	ABL2	NM_007314	Targetscan
hsa-miR-18a-5p	27	ABL2	NM_005158	Targetscan
hsa-miR-18a-5p	27	ABL2	NM_001168237	Targetscan
hsa-miR-18a-5p	27	ABL2	NM_001136000	Targetscan
hsa-miR-18a-5p	27	ABL2	NM_001168238	Targetscan
hsa-miR-18a-5p	27	ABL2	NM_001168239	Targetscan
hsa-miR-18a-5p	27	ABL2	NM_001168236	Targetscan
hsa-miR-195-5p	27	ABL2	NM_001100108;NM_005158;NM_007314	PITA
hsa-miR-195-5p	27	ABL2	NM_001136000	Eimmo
hsa-miR-195-5p	27	ABL2	NM_001168237	Eimmo
hsa-miR-195-5p	27	ABL2	NM_005158	Eimmo
hsa-miR-195-5p	27	ABL2	NM_001168238	Eimmo
hsa-miR-195-5p	27	ABL2	NM_001168239	Eimmo
hsa-miR-195-5p	27	ABL2	NM_001168236	Eimmo
hsa-miR-195-5p	27	ABL2	NM_007314	Eimmo
hsa-miR-195-5p	27	ABL2	NM_001168239	Pictar
hsa-miR-195-5p	27	ABL2	NM_001168237	Pictar
hsa-miR-195-5p	27	ABL2	NM_001168236	Pictar
hsa-miR-195-5p	27	ABL2	NM_007314	Pictar
hsa-miR-195-5p	27	ABL2	NM_001168238	Pictar
hsa-miR-195-5p	27	ABL2	NM_005158	Pictar
hsa-miR-195-5p	27	ABL2	NM_001136000	Pictar
hsa-miR-20a-3p	27	ABL2	AK225255	Miranda
hsa-miR-20a-3p	27	ABL2	NM_001136000	Eimmo
hsa-miR-20a-3p	27	ABL2	NM_001168237	Eimmo
hsa-miR-20a-3p	27	ABL2	NM_005158	Eimmo
hsa-miR-20a-3p	27	ABL2	NM_001168238	Eimmo
hsa-miR-20a-3p	27	ABL2	NM_001168239	Eimmo
hsa-miR-20a-3p	27	ABL2	NM_001168236	Eimmo
hsa-miR-20a-3p	27	ABL2	NM_007314	Eimmo
hsa-miR-20a-3p	27	ABL2	NM_001100108;NM_005158;NM_007314	PITA
hsa-miR-20a-5p	27	ABL2	AK225255	Miranda
hsa-miR-20a-5p	27	ABL2	NM_001100108;NM_005158;NM_007314	PITA
hsa-miR-20a-5p	27	ABL2	NM_001136000	Eimmo
hsa-miR-20a-5p	27	ABL2	NM_001168237	Eimmo
hsa-miR-20a-5p	27	ABL2	NM_005158	Eimmo
hsa-miR-20a-5p	27	ABL2	NM_001168238	Eimmo
hsa-miR-20a-5p	27	ABL2	NM_001168239	Eimmo
hsa-miR-20a-5p	27	ABL2	NM_001168236	Eimmo
hsa-miR-20a-5p	27	ABL2	NM_007314	Eimmo
hsa-miR-20a-5p	27	ABL2	NM_005158	mirDB
hsa-miR-20a-5p	27	ABL2	NM_001168238	mirDB
hsa-miR-20a-5p	27	ABL2	NM_007314	mirDB
hsa-miR-20a-5p	27	ABL2	NM_001168239	mirDB
hsa-miR-20a-5p	27	ABL2	NM_001136000	mirDB
hsa-miR-20a-5p	27	ABL2	NM_001168236	mirDB
hsa-miR-20a-5p	27	ABL2	NM_001168237	mirDB
hsa-miR-218-5p	27	ABL2	NM_001136000	Eimmo
hsa-miR-218-5p	27	ABL2	NM_001168237	Eimmo
hsa-miR-218-5p	27	ABL2	NM_005158	Eimmo
hsa-miR-218-5p	27	ABL2	NM_001168238	Eimmo
hsa-miR-218-5p	27	ABL2	NM_001168239	Eimmo
hsa-miR-218-5p	27	ABL2	NM_001168236	Eimmo
hsa-miR-218-5p	27	ABL2	NM_007314	Eimmo
hsa-miR-218-5p	27	ABL2	NM_007314	Targetscan
hsa-miR-218-5p	27	ABL2	NM_005158	Targetscan
hsa-miR-218-5p	27	ABL2	NM_001136000	Targetscan
hsa-miR-218-5p	27	ABL2	NM_001168236	Targetscan
hsa-miR-218-5p	27	ABL2	NM_001168239	Targetscan
hsa-miR-218-5p	27	ABL2	NM_001168237	Targetscan
hsa-miR-218-5p	27	ABL2	NM_001168238	Targetscan
hsa-miR-223-3p	27	ABL2	NM_001168239	Eimmo
hsa-miR-223-3p	27	ABL2	NM_001168236	Eimmo
hsa-miR-223-3p	27	ABL2	NM_007314	Eimmo
hsa-miR-223-3p	27	ABL2	NM_001136000	Eimmo
hsa-miR-223-3p	27	ABL2	NM_001168237	Eimmo
hsa-miR-223-3p	27	ABL2	NM_005158	Eimmo
hsa-miR-223-3p	27	ABL2	NM_001168238	Eimmo
hsa-miR-223-3p	27	ABL2	NM_007314	Targetscan
hsa-miR-223-3p	27	ABL2	NM_001168236	Targetscan
hsa-miR-223-3p	27	ABL2	NM_001168238	Targetscan
hsa-miR-223-3p	27	ABL2	NM_005158	Targetscan
hsa-miR-223-3p	27	ABL2	NM_001136000	Targetscan
hsa-miR-223-3p	27	ABL2	NM_001168237	Targetscan
hsa-miR-223-3p	27	ABL2	NM_001168239	Targetscan
hsa-miR-31-3p	27	ABL2	NM_007314	Targetscan
hsa-miR-31-3p	27	ABL2	NM_001136000	Targetscan
hsa-miR-31-3p	27	ABL2	NM_001168238	Targetscan
hsa-miR-31-3p	27	ABL2	NM_005158	Targetscan
hsa-miR-31-3p	27	ABL2	NM_001168237	Targetscan
hsa-miR-31-3p	27	ABL2	NM_001168239	Targetscan
hsa-miR-31-3p	27	ABL2	NM_001168236	Targetscan
hsa-miR-31-5p	27	ABL2	NM_007314	Targetscan
hsa-miR-31-5p	27	ABL2	NM_001136000	Targetscan
hsa-miR-31-5p	27	ABL2	NM_001168238	Targetscan
hsa-miR-31-5p	27	ABL2	NM_005158	Targetscan
hsa-miR-31-5p	27	ABL2	NM_001168237	Targetscan
hsa-miR-31-5p	27	ABL2	NM_001168239	Targetscan
hsa-miR-31-5p	27	ABL2	NM_001168236	Targetscan
hsa-miR-497-5p	27	ABL2	NM_001100108;NM_005158;NM_007314	PITA
hsa-miR-497-5p	27	ABL2	NM_001136000	Eimmo
hsa-miR-497-5p	27	ABL2	NM_001168237	Eimmo
hsa-miR-497-5p	27	ABL2	NM_005158	Eimmo
hsa-miR-497-5p	27	ABL2	NM_001168238	Eimmo
hsa-miR-497-5p	27	ABL2	NM_001168239	Eimmo
hsa-miR-497-5p	27	ABL2	NM_001168236	Eimmo
hsa-miR-497-5p	27	ABL2	NM_007314	Eimmo
hsa-miR-497-5p	27	ABL2	NM_005158	mirDB
hsa-miR-497-5p	27	ABL2	NM_001168238	mirDB
hsa-miR-497-5p	27	ABL2	NM_007314	mirDB
hsa-miR-497-5p	27	ABL2	NM_001168239	mirDB
hsa-miR-497-5p	27	ABL2	NM_001136000	mirDB
hsa-miR-497-5p	27	ABL2	NM_001168236	mirDB
hsa-miR-497-5p	27	ABL2	NM_001168237	mirDB
hsa-miR-497-5p	27	ABL2	NM_001168239	Pictar
hsa-miR-497-5p	27	ABL2	NM_001168237	Pictar
hsa-miR-497-5p	27	ABL2	NM_001168236	Pictar
hsa-miR-497-5p	27	ABL2	NM_007314	Pictar
hsa-miR-497-5p	27	ABL2	NM_001168238	Pictar
hsa-miR-497-5p	27	ABL2	NM_005158	Pictar
hsa-miR-497-5p	27	ABL2	NM_001136000	Pictar
hsa-miR-513a-5p	27	ABL2	NM_001136000	Eimmo
hsa-miR-513a-5p	27	ABL2	NM_001168237	Eimmo
hsa-miR-513a-5p	27	ABL2	NM_005158	Eimmo
hsa-miR-513a-5p	27	ABL2	NM_001168238	Eimmo
hsa-miR-513a-5p	27	ABL2	NM_001168239	Eimmo
hsa-miR-513a-5p	27	ABL2	NM_001168236	Eimmo
hsa-miR-513a-5p	27	ABL2	NM_007314	Eimmo
hsa-miR-513a-5p	27	ABL2	NM_001168239	Pictar
hsa-miR-513a-5p	27	ABL2	NM_001168237	Pictar
hsa-miR-513a-5p	27	ABL2	NM_001168236	Pictar
hsa-miR-513a-5p	27	ABL2	NM_007314	Pictar
hsa-miR-513a-5p	27	ABL2	NM_001168238	Pictar
hsa-miR-513a-5p	27	ABL2	NM_005158	Pictar
hsa-miR-513a-5p	27	ABL2	NM_001136000	Pictar
hsa-miR-92a-3p	27	ABL2	NM_001136000	Eimmo
hsa-miR-92a-3p	27	ABL2	NM_001168237	Eimmo
hsa-miR-92a-3p	27	ABL2	NM_005158	Eimmo
hsa-miR-92a-3p	27	ABL2	NM_001168238	Eimmo
hsa-miR-92a-3p	27	ABL2	NM_001168239	Eimmo
hsa-miR-92a-3p	27	ABL2	NM_001168236	Eimmo
hsa-miR-92a-3p	27	ABL2	NM_007314	Eimmo
hsa-miR-1	3983	ABLIM1	NM_006720	Targetscan
hsa-miR-1	3983	ABLIM1	NM_001003407	Targetscan
hsa-miR-1	3983	ABLIM1	NM_002313	Targetscan
hsa-miR-1	3983	ABLIM1	NM_001003408	Targetscan
hsa-miR-130a-3p	3983	ABLIM1	AK057834	Miranda
hsa-miR-146a-5p	3983	ABLIM1	NM_002313	Targetscan
hsa-miR-146a-5p	3983	ABLIM1	NM_001003407	Targetscan
hsa-miR-146a-5p	3983	ABLIM1	NM_006720	Targetscan
hsa-miR-146a-5p	3983	ABLIM1	NM_001003408	Targetscan
hsa-miR-17-3p	3983	ABLIM1	AK057834	Miranda
hsa-miR-17-3p	3983	ABLIM1	NM_002313	Targetscan
hsa-miR-17-3p	3983	ABLIM1	NM_006720	Targetscan
hsa-miR-17-3p	3983	ABLIM1	NM_001003407	Targetscan
hsa-miR-17-3p	3983	ABLIM1	NM_001003408	Targetscan
hsa-miR-181a-3p	3983	ABLIM1	NM_002313	Miranda
hsa-miR-181a-3p	3983	ABLIM1	NM_002313	Targetscan
hsa-miR-181a-3p	3983	ABLIM1	NM_006720	Targetscan
hsa-miR-181a-3p	3983	ABLIM1	NM_001003407	Targetscan
hsa-miR-181a-3p	3983	ABLIM1	NM_001003408	Targetscan
hsa-miR-18a-5p	3983	ABLIM1	NM_002313	Targetscan
hsa-miR-18a-5p	3983	ABLIM1	NM_006720	Targetscan
hsa-miR-18a-5p	3983	ABLIM1	NM_001003407	Targetscan
hsa-miR-18a-5p	3983	ABLIM1	NM_001003408	Targetscan
hsa-miR-20a-3p	3983	ABLIM1	AK057834	Miranda
hsa-miR-20a-5p	3983	ABLIM1	AK057834	Miranda
hsa-miR-223-3p	3983	ABLIM1	NM_002313	Targetscan
hsa-miR-223-3p	3983	ABLIM1	NM_006720	Targetscan
hsa-miR-223-3p	3983	ABLIM1	NM_001003408	Targetscan
hsa-miR-223-3p	3983	ABLIM1	NM_001003407	Targetscan
hsa-miR-31-3p	3983	ABLIM1	NM_002313	Targetscan
hsa-miR-31-3p	3983	ABLIM1	NM_006720	Targetscan
hsa-miR-31-3p	3983	ABLIM1	NM_001003407	Targetscan
hsa-miR-31-3p	3983	ABLIM1	NM_001003408	Targetscan
hsa-miR-31-5p	3983	ABLIM1	NM_001003408	Pictar
hsa-miR-31-5p	3983	ABLIM1	NM_002313	Pictar
hsa-miR-31-5p	3983	ABLIM1	NM_001003407	Pictar
hsa-miR-31-5p	3983	ABLIM1	NM_006720	Pictar
hsa-miR-31-5p	3983	ABLIM1	NM_002313	Targetscan
hsa-miR-31-5p	3983	ABLIM1	NM_006720	Targetscan
hsa-miR-31-5p	3983	ABLIM1	NM_001003407	Targetscan
hsa-miR-31-5p	3983	ABLIM1	NM_001003408	Targetscan
hsa-miR-513a-5p	3983	ABLIM1	NM_001003407;NM_001003408;NM_002313;NM_006720	PITA
hsa-miR-1	84448	ABLIM2	NM_001130084	Targetscan
hsa-miR-1	84448	ABLIM2	NM_001130083	Targetscan
hsa-miR-1	84448	ABLIM2	NM_001130085	Targetscan
hsa-miR-1	84448	ABLIM2	NM_001130086	Targetscan
hsa-miR-1	84448	ABLIM2	NM_032432	Targetscan
hsa-miR-1	84448	ABLIM2	NM_001130087	Targetscan
hsa-miR-1	84448	ABLIM2	NM_001130088	Targetscan
hsa-miR-17-3p	84448	ABLIM2	NM_001130088	Miranda
hsa-miR-17-3p	84448	ABLIM2	NM_001130088	Targetscan
hsa-miR-18a-5p	84448	ABLIM2	NM_001130084	Targetscan
hsa-miR-18a-5p	84448	ABLIM2	NM_001130083	Targetscan
hsa-miR-18a-5p	84448	ABLIM2	NM_001130085	Targetscan
hsa-miR-18a-5p	84448	ABLIM2	NM_001130086	Targetscan
hsa-miR-18a-5p	84448	ABLIM2	NM_032432	Targetscan
hsa-miR-18a-5p	84448	ABLIM2	NM_001130087	Targetscan
hsa-miR-20a-3p	84448	ABLIM2	NM_001130088	Miranda
hsa-miR-20a-5p	84448	ABLIM2	NM_001130088	Miranda
hsa-miR-92a-3p	84448	ABLIM2	NM_001130083	Miranda
hsa-miR-1	22885	ABLIM3	NM_014945	Targetscan
hsa-miR-125b-5p	22885	ABLIM3	NM_014945	Miranda
hsa-miR-125b-5p	22885	ABLIM3	AM393820	Miranda
hsa-miR-135b-5p	22885	ABLIM3	NM_014945	Miranda
hsa-miR-146a-5p	22885	ABLIM3	NM_014945	Targetscan
hsa-miR-18a-5p	22885	ABLIM3	NM_014945	Miranda
hsa-miR-18a-5p	22885	ABLIM3	NM_014945	Targetscan
hsa-miR-218-5p	22885	ABLIM3	NM_014945	Miranda
hsa-miR-218-5p	22885	ABLIM3	AM393820	Miranda
hsa-miR-218-5p	22885	ABLIM3	NM_014945	Eimmo
hsa-miR-218-5p	22885	ABLIM3	NM_014945	Pictar
hsa-miR-218-5p	22885	ABLIM3	NM_014945	Targetscan
hsa-miR-218-5p	22885	ABLIM3	NM_014945	PITA
hsa-miR-223-3p	22885	ABLIM3	NM_014945	Miranda
hsa-miR-223-3p	22885	ABLIM3	AM393820	Miranda
hsa-miR-223-3p	22885	ABLIM3	NM_014945	Targetscan
hsa-miR-1	28	ABO	NM_020469	Targetscan
hsa-miR-99a-5p	28	ABO	NM_020469	Targetscan
hsa-miR-1	29	ABR	NM_021962	Targetscan
hsa-miR-1	29	ABR	NM_001092	Targetscan
hsa-miR-1	29	ABR	NM_001159746	Targetscan
hsa-miR-125b-5p	29	ABR	NM_001159746	Eimmo
hsa-miR-125b-5p	29	ABR	NM_021962	Eimmo
hsa-miR-125b-5p	29	ABR	NM_001092	Eimmo
hsa-miR-17-3p	29	ABR	NM_021962	Miranda
hsa-miR-17-3p	29	ABR	NM_021962	Targetscan
hsa-miR-17-3p	29	ABR	NM_001092	Targetscan
hsa-miR-17-3p	29	ABR	NM_001159746	Targetscan
hsa-miR-18a-5p	29	ABR	NM_021962	Targetscan
hsa-miR-18a-5p	29	ABR	NM_001092	Targetscan
hsa-miR-18a-5p	29	ABR	NM_001159746	Targetscan
hsa-miR-20a-3p	29	ABR	NM_021962	Miranda
hsa-miR-20a-5p	29	ABR	NM_021962	Miranda
hsa-miR-31-3p	29	ABR	NM_021962	Miranda
hsa-miR-31-3p	29	ABR	NM_001159746	Targetscan
hsa-miR-31-3p	29	ABR	NM_001092	Targetscan
hsa-miR-31-3p	29	ABR	NM_021962	Targetscan
hsa-miR-31-3p	29	ABR	NM_001092;NM_021962	PITA
hsa-miR-31-5p	29	ABR	NM_021962	Miranda
hsa-miR-31-5p	29	ABR	NM_001159746	Targetscan
hsa-miR-31-5p	29	ABR	NM_001092	Targetscan
hsa-miR-31-5p	29	ABR	NM_021962	Targetscan
hsa-miR-31-5p	29	ABR	NM_001092;NM_021962	PITA
hsa-miR-340-5p	29	ABR	NM_001092	Eimmo
hsa-miR-340-5p	29	ABR	NM_001159746	Eimmo
hsa-miR-340-5p	29	ABR	NM_021962	Eimmo
hsa-miR-340-5p	29	ABR	NM_001159746	Targetscan
hsa-miR-340-5p	29	ABR	NM_001092	Targetscan
hsa-miR-340-5p	29	ABR	NM_021962	Targetscan
hsa-let-7e-5p	137735	ABRA	NM_139166	Miranda
hsa-miR-1	137735	ABRA	NM_139166	Targetscan
hsa-miR-135b-5p	137735	ABRA	NM_139166	Miranda
hsa-miR-17-3p	137735	ABRA	NM_139166	Miranda
hsa-miR-17-3p	137735	ABRA	NM_139166	Targetscan
hsa-miR-181a-3p	137735	ABRA	NM_139166	Eimmo
hsa-miR-18a-5p	137735	ABRA	NM_139166	Miranda
hsa-miR-20a-3p	137735	ABRA	NM_139166	Miranda
hsa-miR-20a-5p	137735	ABRA	NM_139166	Miranda
hsa-miR-218-5p	137735	ABRA	NM_139166	Miranda
hsa-miR-218-5p	137735	ABRA	NM_139166	Targetscan
hsa-miR-340-5p	137735	ABRA	NM_139166	Miranda
hsa-miR-340-5p	137735	ABRA	NM_139166	Targetscan
hsa-miR-92a-3p	137735	ABRA	NM_139166	Miranda
hsa-let-7e-5p	29777	ABT1	NM_013375	Miranda
hsa-miR-1	29777	ABT1	NM_013375	Targetscan
hsa-miR-135b-5p	29777	ABT1	NM_013375	Miranda
hsa-miR-17-3p	29777	ABT1	NM_013375	Miranda
hsa-miR-17-3p	29777	ABT1	NM_013375	Targetscan
hsa-miR-18a-5p	29777	ABT1	NM_013375	Targetscan
hsa-miR-20a-3p	29777	ABT1	NM_013375	Miranda
hsa-miR-20a-5p	29777	ABT1	NM_013375	Miranda
hsa-miR-31-3p	29777	ABT1	NM_013375	Miranda
hsa-miR-31-5p	29777	ABT1	NM_013375	Miranda
hsa-miR-1	80325	ABTB1	NM_172027	Targetscan
hsa-miR-1	80325	ABTB1	NM_032548	Targetscan
hsa-miR-125b-5p	80325	ABTB1	NM_172027	Miranda
hsa-miR-125b-5p	80325	ABTB1	NM_172027	Eimmo
hsa-miR-125b-5p	80325	ABTB1	NM_032548;NM_172027;NM_172028	PITA
hsa-miR-17-3p	80325	ABTB1	NM_172027	Miranda
hsa-miR-17-3p	80325	ABTB1	NM_172027	Targetscan
hsa-miR-17-3p	80325	ABTB1	NM_032548	Targetscan
hsa-miR-20a-3p	80325	ABTB1	NM_172027	Miranda
hsa-miR-20a-5p	80325	ABTB1	NM_172027	Miranda
hsa-miR-1	25841	ABTB2	NM_145804	Targetscan
hsa-miR-130a-3p	25841	ABTB2	NM_145804	Miranda
hsa-miR-181a-3p	25841	ABTB2	NM_145804	Miranda
hsa-miR-181a-3p	25841	ABTB2	NM_145804	Eimmo
hsa-miR-181a-3p	25841	ABTB2	NM_145804	Targetscan
hsa-miR-18a-5p	25841	ABTB2	NM_145804	Miranda
hsa-miR-18a-5p	25841	ABTB2	NM_145804	Targetscan
hsa-miR-195-5p	25841	ABTB2	NM_145804	Miranda
hsa-miR-195-5p	25841	ABTB2	NM_145804	Eimmo
hsa-miR-497-5p	25841	ABTB2	NM_145804	Miranda
hsa-miR-1	30	ACAA1	NM_001607	Targetscan
hsa-miR-1	30	ACAA1	NM_001130410	Targetscan
hsa-miR-92a-3p	30	ACAA1	NM_001607	Miranda
hsa-miR-92a-3p	30	ACAA1	CR618847	Miranda
hsa-miR-1	10449	ACAA2	NM_006111	Targetscan
hsa-miR-135b-5p	10449	ACAA2	NM_006111	Miranda
hsa-miR-31-3p	10449	ACAA2	NM_006111	Miranda
hsa-miR-31-3p	10449	ACAA2	NM_006111	Targetscan
hsa-miR-31-5p	10449	ACAA2	NM_006111	Miranda
hsa-miR-31-5p	10449	ACAA2	NM_006111	Targetscan
hsa-miR-1	31	ACACA	NM_198834	Miranda
hsa-miR-1	31	ACACA	NM_198834	Targetscan
hsa-miR-1	31	ACACA	NM_198836	Targetscan
hsa-miR-1	31	ACACA	NM_198838	Targetscan
hsa-miR-1	31	ACACA	NM_198837	Targetscan
hsa-miR-1	31	ACACA	NM_198839	Targetscan
hsa-miR-18a-5p	31	ACACA	NM_198834	Miranda
hsa-miR-18a-5p	31	ACACA	NM_198836	Targetscan
hsa-miR-18a-5p	31	ACACA	NM_198837	Targetscan
hsa-miR-18a-5p	31	ACACA	NM_198839	Targetscan
hsa-miR-18a-5p	31	ACACA	NM_198838	Targetscan
hsa-miR-18a-5p	31	ACACA	NM_198834	Targetscan
hsa-miR-218-5p	31	ACACA	NM_198834	Miranda
hsa-miR-1	32	ACACB	NM_001093	Targetscan
hsa-miR-125b-5p	32	ACACB	NM_001093	Miranda
hsa-miR-135b-5p	32	ACACB	AK302469	Miranda
hsa-miR-135b-5p	32	ACACB	BC028417	Miranda
hsa-miR-181a-3p	32	ACACB	NM_001093	Miranda
hsa-miR-181a-3p	32	ACACB	AK302469	Miranda
hsa-miR-181a-3p	32	ACACB	NM_001093	Targetscan
hsa-miR-18a-5p	32	ACACB	AK302469	Miranda
hsa-miR-195-5p	32	ACACB	NM_001093	Miranda
hsa-miR-195-5p	32	ACACB	NM_001093	Eimmo
hsa-miR-31-3p	32	ACACB	NM_001093	Targetscan
hsa-miR-31-5p	32	ACACB	NM_001093	Targetscan
hsa-miR-497-5p	32	ACACB	NM_001093	Miranda
hsa-let-7e-5p	80724	ACAD10	AK310923	Miranda
hsa-miR-1	80724	ACAD10	BC015056	Miranda
hsa-miR-1	80724	ACAD10	BC054886	Miranda
hsa-miR-1	80724	ACAD10	NM_001136538	Targetscan
hsa-miR-1	80724	ACAD10	NM_025247	Targetscan
hsa-miR-130a-3p	80724	ACAD10	BC015056	Miranda
hsa-miR-130a-3p	80724	ACAD10	BC054886	Miranda
hsa-miR-135b-5p	80724	ACAD10	BC015056	Miranda
hsa-miR-135b-5p	80724	ACAD10	AK310923	Miranda
hsa-miR-135b-5p	80724	ACAD10	BC054886	Miranda
hsa-miR-146a-5p	80724	ACAD10	BC015056	Miranda
hsa-miR-146a-5p	80724	ACAD10	BC054886	Miranda
hsa-miR-17-3p	80724	ACAD10	BC015056	Miranda
hsa-miR-17-3p	80724	ACAD10	BC054886	Miranda
hsa-miR-20a-3p	80724	ACAD10	BC015056	Miranda
hsa-miR-20a-3p	80724	ACAD10	BC054886	Miranda
hsa-miR-20a-5p	80724	ACAD10	BC015056	Miranda
hsa-miR-20a-5p	80724	ACAD10	BC054886	Miranda
hsa-miR-497-5p	80724	ACAD10	AK097425	Miranda
hsa-miR-92a-3p	80724	ACAD10	AK310923	Miranda
hsa-miR-1	84129	ACAD11	AK298627	Miranda
hsa-miR-1	84129	ACAD11	NM_032169	Targetscan
hsa-miR-130a-3p	84129	ACAD11	NM_032169	Miranda
hsa-miR-181a-3p	84129	ACAD11	CR596046	Miranda
hsa-miR-18a-5p	84129	ACAD11	NM_032169	Miranda
hsa-miR-18a-5p	84129	ACAD11	NM_032169	Targetscan
hsa-miR-340-5p	84129	ACAD11	NM_032169	Miranda
hsa-miR-340-5p	84129	ACAD11	CR596046	Miranda
hsa-miR-340-5p	84129	ACAD11	NM_032169	Eimmo
hsa-miR-340-5p	84129	ACAD11	NM_032169	mirDB
hsa-miR-340-5p	84129	ACAD11	NM_032169	Targetscan
hsa-miR-1	27034	ACAD8	NM_014384	Targetscan
hsa-miR-125b-5p	27034	ACAD8	AK301921	Miranda
hsa-miR-17-3p	27034	ACAD8	AK301518	Miranda
hsa-miR-17-3p	27034	ACAD8	NM_014384	Targetscan
hsa-miR-181a-3p	27034	ACAD8	NM_014384	Miranda
hsa-miR-181a-3p	27034	ACAD8	NM_014384	Targetscan
hsa-miR-18a-5p	27034	ACAD8	AK309051	Miranda
hsa-miR-196b-5p	27034	ACAD8	NM_014384	Miranda
hsa-miR-20a-3p	27034	ACAD8	AK301518	Miranda
hsa-miR-20a-5p	27034	ACAD8	AK301518	Miranda
hsa-miR-31-3p	27034	ACAD8	NM_014384	Miranda
hsa-miR-31-3p	27034	ACAD8	AK309051	Miranda
hsa-miR-31-5p	27034	ACAD8	NM_014384	Miranda
hsa-miR-31-5p	27034	ACAD8	AK309051	Miranda
hsa-miR-92a-3p	27034	ACAD8	AK301518	Miranda
hsa-let-7e-5p	28976	ACAD9	CR613592	Miranda
hsa-miR-1	28976	ACAD9	NM_014049	Targetscan
hsa-miR-130a-3p	28976	ACAD9	CR613592	Miranda
hsa-miR-133b	28976	ACAD9	CR613592	Miranda
hsa-miR-1	33	ACADL	NM_001608	Targetscan
hsa-miR-133b	33	ACADL	AK296161	Miranda
hsa-miR-135b-5p	33	ACADL	NM_001608	Miranda
hsa-miR-181a-3p	33	ACADL	AK296161	Miranda
hsa-miR-223-3p	33	ACADL	NM_001608	Miranda
hsa-miR-223-3p	33	ACADL	AK296161	Miranda
hsa-miR-31-3p	33	ACADL	NM_001608	Miranda
hsa-miR-31-3p	33	ACADL	NM_001608	Targetscan
hsa-miR-31-5p	33	ACADL	NM_001608	Miranda
hsa-miR-31-5p	33	ACADL	NM_001608	Targetscan
hsa-miR-340-5p	33	ACADL	NM_001608	Miranda
hsa-miR-92a-3p	33	ACADL	NM_001608	Miranda
hsa-miR-92a-3p	33	ACADL	NM_001608	mirDB
hsa-miR-1	34	ACADM	NM_000016	Targetscan
hsa-miR-1	34	ACADM	NM_001127328	Targetscan
hsa-miR-125b-5p	34	ACADM	AK311022	Miranda
hsa-miR-133b	34	ACADM	AK311022	Miranda
hsa-miR-146a-5p	34	ACADM	NM_001127328	Miranda
hsa-miR-17-3p	34	ACADM	NM_001127328	Miranda
hsa-miR-17-3p	34	ACADM	NM_001127328	Targetscan
hsa-miR-17-3p	34	ACADM	NM_000016	Targetscan
hsa-miR-181a-3p	34	ACADM	AK301039	Miranda
hsa-miR-195-5p	34	ACADM	AK311022	Miranda
hsa-miR-20a-3p	34	ACADM	NM_001127328	Miranda
hsa-miR-20a-5p	34	ACADM	NM_001127328	Miranda
hsa-miR-31-3p	34	ACADM	NM_001127328	Miranda
hsa-miR-31-5p	34	ACADM	NM_001127328	Miranda
hsa-miR-1	35	ACADS	NM_000017	Targetscan
hsa-miR-1	36	ACADSB	NM_001609	Targetscan
hsa-miR-130a-3p	36	ACADSB	NM_001609	Miranda
hsa-miR-130a-3p	36	ACADSB	NM_001609	Targetscan
hsa-miR-17-3p	36	ACADSB	NM_001609	Miranda
hsa-miR-17-3p	36	ACADSB	NM_001609	Targetscan
hsa-miR-20a-3p	36	ACADSB	NM_001609	Miranda
hsa-miR-20a-5p	36	ACADSB	NM_001609	Miranda
hsa-miR-223-3p	36	ACADSB	NM_001609	Miranda
hsa-miR-31-3p	36	ACADSB	NM_001609	Miranda
hsa-miR-31-3p	36	ACADSB	NM_001609	Targetscan
hsa-miR-31-5p	36	ACADSB	NM_001609	Miranda
hsa-miR-31-5p	36	ACADSB	NM_001609	Targetscan
hsa-miR-340-5p	36	ACADSB	NM_001609	Miranda
hsa-miR-340-5p	36	ACADSB	NM_001609	Eimmo
hsa-miR-340-5p	36	ACADSB	NM_001609	Targetscan
hsa-miR-340-5p	36	ACADSB	NM_001609	PITA
hsa-miR-1	37	ACADVL	NM_000018	Targetscan
hsa-miR-1	37	ACADVL	NM_001033859	Targetscan
hsa-miR-497-5p	37	ACADVL	NM_000018	Miranda
hsa-miR-99a-5p	37	ACADVL	AK302653	Miranda
hsa-miR-1	176	ACAN	NM_001135	Targetscan
hsa-miR-1	176	ACAN	NM_013227	Targetscan
hsa-miR-135b-5p	176	ACAN	BC036445	Miranda
hsa-miR-181a-3p	176	ACAN	NM_013227	Miranda
hsa-miR-181a-3p	176	ACAN	NM_013227	Targetscan
hsa-miR-181a-3p	176	ACAN	NM_001135	Targetscan
hsa-miR-223-3p	176	ACAN	NM_013227	Miranda
hsa-miR-92a-3p	176	ACAN	NM_013227	Miranda
hsa-miR-92a-3p	176	ACAN	NM_001135;NM_013227	PITA
hsa-miR-1	23527	ACAP2	NM_012287	Eimmo
hsa-miR-1	23527	ACAP2	NM_012287	Pictar
hsa-miR-1	23527	ACAP2	NM_012287	Targetscan
hsa-miR-17-3p	23527	ACAP2	NM_012287	Miranda
hsa-miR-17-3p	23527	ACAP2	NM_012287	Eimmo
hsa-miR-17-3p	23527	ACAP2	NM_012287	Targetscan
hsa-miR-181a-3p	23527	ACAP2	NM_012287	Miranda
hsa-miR-181a-3p	23527	ACAP2	NM_012287	Eimmo
hsa-miR-181a-3p	23527	ACAP2	NM_012287	Targetscan
hsa-miR-18a-5p	23527	ACAP2	NM_012287	Targetscan
hsa-miR-20a-3p	23527	ACAP2	NM_012287	Miranda
hsa-miR-20a-5p	23527	ACAP2	NM_012287	Miranda
hsa-miR-31-3p	23527	ACAP2	NM_012287	Targetscan
hsa-miR-31-5p	23527	ACAP2	NM_012287	Targetscan
hsa-miR-340-5p	23527	ACAP2	NM_012287	Miranda
hsa-miR-340-5p	23527	ACAP2	NM_012287	Eimmo
hsa-miR-340-5p	23527	ACAP2	NM_012287	Targetscan
hsa-miR-513a-5p	23527	ACAP2	NM_012287	Eimmo
hsa-miR-513a-5p	23527	ACAP2	NM_012287	mirDB
hsa-let-7e-5p	116983	ACAP3	NM_030649	Eimmo
hsa-miR-1	116983	ACAP3	NM_030649	Targetscan
hsa-miR-125b-5p	116983	ACAP3	NM_030649	Eimmo
hsa-miR-17-3p	116983	ACAP3	NM_030649	Miranda
hsa-miR-17-3p	116983	ACAP3	NM_030649	Eimmo
hsa-miR-18a-5p	116983	ACAP3	NM_030649	Targetscan
hsa-miR-31-3p	116983	ACAP3	NM_030649	Miranda
hsa-miR-31-3p	116983	ACAP3	NM_030649	Targetscan
hsa-miR-31-5p	116983	ACAP3	NM_030649	Miranda
hsa-miR-31-5p	116983	ACAP3	NM_030649	Targetscan
hsa-miR-1	38	ACAT1	NM_000019	Targetscan
hsa-miR-125b-5p	38	ACAT1	NM_000019	Miranda
hsa-miR-130a-3p	38	ACAT1	BC063853	Miranda
hsa-miR-146a-5p	38	ACAT1	BC063853	Miranda
hsa-miR-196b-5p	38	ACAT1	BC063853	Miranda
hsa-miR-31-3p	38	ACAT1	BC063853	Miranda
hsa-miR-31-5p	38	ACAT1	BC063853	Miranda
hsa-miR-340-5p	38	ACAT1	NM_000019	Miranda
hsa-miR-340-5p	38	ACAT1	BC010942	Miranda
hsa-miR-340-5p	38	ACAT1	BC063853	Miranda
hsa-miR-340-5p	38	ACAT1	NM_000019	Targetscan
hsa-miR-1	39	ACAT2	NM_005891	Targetscan
hsa-miR-133b	39	ACAT2	NM_005891	Miranda
hsa-miR-133b	39	ACAT2	NM_005891	Eimmo
hsa-miR-1	64746	ACBD3	NM_022735	Targetscan
hsa-miR-130a-3p	64746	ACBD3	NM_022735	Miranda
hsa-miR-130a-3p	64746	ACBD3	NM_022735	Targetscan
hsa-miR-130a-3p	64746	ACBD3	NM_022735	PITA
hsa-miR-130a-3p	64746	ACBD3	NM_022735	Eimmo
hsa-miR-181a-3p	64746	ACBD3	NM_022735	Eimmo
hsa-miR-340-5p	64746	ACBD3	NM_022735	Targetscan
hsa-let-7e-5p	79777	ACBD4	NM_001135707	Miranda
hsa-miR-1	79777	ACBD4	NM_001135707	Targetscan
hsa-miR-1	79777	ACBD4	NM_024722	Targetscan
hsa-miR-1	79777	ACBD4	NM_001135706	Targetscan
hsa-miR-1	79777	ACBD4	NM_001135704	Targetscan
hsa-miR-1	79777	ACBD4	NM_001135705	Targetscan
hsa-miR-181a-3p	79777	ACBD4	BC022000	Miranda
hsa-miR-181a-3p	79777	ACBD4	NM_001135705	Miranda
hsa-miR-1	91452	ACBD5	NM_145698	Targetscan
hsa-miR-1	91452	ACBD5	NM_001042473	Targetscan
hsa-miR-130a-3p	91452	ACBD5	NM_145698	Miranda
hsa-miR-130a-3p	91452	ACBD5	NM_001042473	Targetscan
hsa-miR-130a-3p	91452	ACBD5	NM_145698	Targetscan
hsa-miR-130a-3p	91452	ACBD5	NM_001042473;NM_145698	PITA
hsa-miR-130a-3p	91452	ACBD5	NM_001042473	Eimmo
hsa-miR-130a-3p	91452	ACBD5	NM_145698	Eimmo
hsa-miR-17-3p	91452	ACBD5	NM_145698	Miranda
hsa-miR-17-3p	91452	ACBD5	NM_001042473	Eimmo
hsa-miR-17-3p	91452	ACBD5	NM_145698	Eimmo
hsa-miR-17-3p	91452	ACBD5	NM_145698	Targetscan
hsa-miR-17-3p	91452	ACBD5	NM_001042473	Targetscan
hsa-miR-17-3p	91452	ACBD5	NM_001042473;NM_145698	PITA
hsa-miR-195-5p	91452	ACBD5	NM_145698	Miranda
hsa-miR-20a-3p	91452	ACBD5	NM_145698	Miranda
hsa-miR-20a-3p	91452	ACBD5	NM_001042473	Eimmo
hsa-miR-20a-3p	91452	ACBD5	NM_145698	Eimmo
hsa-miR-20a-3p	91452	ACBD5	NM_001042473;NM_145698	PITA
hsa-miR-20a-5p	91452	ACBD5	NM_145698	Miranda
hsa-miR-20a-5p	91452	ACBD5	NM_001042473;NM_145698	PITA
hsa-miR-20a-5p	91452	ACBD5	NM_001042473	Eimmo
hsa-miR-20a-5p	91452	ACBD5	NM_145698	Eimmo
hsa-miR-340-5p	91452	ACBD5	NM_145698	Miranda
hsa-miR-340-5p	91452	ACBD5	NM_001042473	Eimmo
hsa-miR-340-5p	91452	ACBD5	NM_145698	Eimmo
hsa-miR-340-5p	91452	ACBD5	NM_145698	Targetscan
hsa-miR-340-5p	91452	ACBD5	NM_001042473	Targetscan
hsa-miR-1	84320	ACBD6	NM_032360	Targetscan
hsa-miR-1	414149	ACBD7	NM_001039844	Miranda
hsa-miR-1	414149	ACBD7	NM_001039844	Targetscan
hsa-miR-146a-5p	414149	ACBD7	NM_001039844	Targetscan
hsa-miR-17-3p	414149	ACBD7	NM_001039844	Targetscan
hsa-miR-223-3p	414149	ACBD7	NM_001039844	Miranda
hsa-miR-31-3p	414149	ACBD7	NM_001039844	Targetscan
hsa-miR-31-5p	414149	ACBD7	NM_001039844	Targetscan
hsa-miR-340-5p	414149	ACBD7	NM_001039844	Miranda
hsa-miR-340-5p	414149	ACBD7	NM_001039844	Targetscan
hsa-miR-1	40	ACCN1	NM_001094	Targetscan
hsa-miR-1	40	ACCN1	NM_183377	Targetscan
hsa-miR-513a-5p	40	ACCN1	NM_001094;NM_183377	PITA
hsa-miR-1	41	ACCN2	NM_001095	Targetscan
hsa-miR-1	41	ACCN2	NM_020039	Targetscan
hsa-miR-130a-3p	41	ACCN2	NM_020039	Miranda
hsa-miR-130a-3p	41	ACCN2	NM_001095	Targetscan
hsa-miR-130a-3p	41	ACCN2	NM_020039	Targetscan
hsa-miR-130a-3p	41	ACCN2	NM_001095;NM_020039	PITA
hsa-miR-181a-3p	41	ACCN2	NM_001095	Targetscan
hsa-miR-181a-3p	41	ACCN2	NM_020039	Targetscan
hsa-miR-18a-5p	41	ACCN2	NM_020039	Miranda
hsa-miR-218-5p	41	ACCN2	NM_020039	Miranda
hsa-miR-218-5p	41	ACCN2	NM_020039	Targetscan
hsa-miR-218-5p	41	ACCN2	NM_001095	Targetscan
hsa-miR-218-5p	41	ACCN2	NM_001095;NM_020039	PITA
hsa-let-7e-5p	9311	ACCN3	AB209421	Miranda
hsa-miR-195-5p	9311	ACCN3	AB209421	Miranda
hsa-miR-196b-5p	9311	ACCN3	AB209421	Miranda
hsa-miR-31-3p	9311	ACCN3	AB209421	Miranda
hsa-miR-31-5p	9311	ACCN3	AB209421	Miranda
hsa-miR-497-5p	9311	ACCN3	AB209421	Miranda
hsa-let-7e-5p	55515	ACCN4	AK309373	Miranda
hsa-let-7e-5p	55515	ACCN4	BC031812	Miranda
hsa-miR-1	55515	ACCN4	NM_018674	Targetscan
hsa-miR-1	55515	ACCN4	NM_182847	Targetscan
hsa-miR-125b-5p	55515	ACCN4	BC031812	Miranda
hsa-miR-31-3p	55515	ACCN4	AK309373	Miranda
hsa-miR-31-3p	55515	ACCN4	AK308804	Miranda
hsa-miR-31-3p	55515	ACCN4	BC031812	Miranda
hsa-miR-31-5p	55515	ACCN4	AK309373	Miranda
hsa-miR-31-5p	55515	ACCN4	AK308804	Miranda
hsa-miR-31-5p	55515	ACCN4	BC031812	Miranda
hsa-miR-340-5p	55515	ACCN4	NM_018674	Targetscan
hsa-miR-340-5p	55515	ACCN4	NM_182847	Targetscan
hsa-miR-1	51802	ACCN5	NM_017419	Targetscan
hsa-miR-135b-5p	51802	ACCN5	NM_017419	Miranda
hsa-miR-1	84680	ACCS	NM_032592	Targetscan
hsa-miR-1	84680	ACCS	NM_001127219	Targetscan
hsa-miR-17-3p	84680	ACCS	AK302515	Miranda
hsa-miR-20a-3p	84680	ACCS	AK302515	Miranda
hsa-miR-20a-5p	84680	ACCS	AK302515	Miranda
hsa-miR-340-5p	84680	ACCS	AK302515	Miranda
hsa-miR-1	390110	ACCSL	NM_001031854	Targetscan
hsa-miR-125b-5p	390110	ACCSL	NM_001031854	Miranda
hsa-let-7e-5p	1636	ACE	BC036375	Miranda
hsa-miR-1	1636	ACE	NM_152830	Targetscan
hsa-miR-1	1636	ACE	NM_000789	Targetscan
hsa-miR-1	1636	ACE	NM_001178057	Targetscan
hsa-miR-17-3p	1636	ACE	AK300516	Miranda
hsa-miR-20a-3p	1636	ACE	AK300516	Miranda
hsa-miR-20a-5p	1636	ACE	AK300516	Miranda
hsa-miR-218-5p	1636	ACE	AK300516	Miranda
hsa-miR-340-5p	1636	ACE	NM_001178057	Eimmo
hsa-miR-340-5p	1636	ACE	NM_152830	Eimmo
hsa-miR-340-5p	1636	ACE	NM_000789	Eimmo
hsa-miR-340-5p	1636	ACE	NM_001178057	Targetscan
hsa-miR-340-5p	1636	ACE	NM_000789	Targetscan
hsa-miR-340-5p	1636	ACE	NM_152830	Targetscan
hsa-miR-1	59272	ACE2	NM_021804	Targetscan
hsa-miR-181a-3p	59272	ACE2	NM_021804	Miranda
hsa-miR-218-5p	59272	ACE2	NM_021804	Targetscan
hsa-let-7e-5p	340485	ACER2	NM_001010887	Miranda
hsa-let-7e-5p	340485	ACER2	NM_001010887	Eimmo
hsa-miR-1	340485	ACER2	AF370405	Miranda
hsa-miR-1	340485	ACER2	NM_001010887	Miranda
hsa-miR-1	340485	ACER2	NM_001010887	Eimmo
hsa-miR-1	340485	ACER2	NM_001010887	Targetscan
hsa-miR-125b-5p	340485	ACER2	NM_001010887	Miranda
hsa-miR-125b-5p	340485	ACER2	NM_001010887	Eimmo
hsa-miR-130a-3p	340485	ACER2	AF370405	Miranda
hsa-miR-17-3p	340485	ACER2	NM_001010887	Miranda
hsa-miR-17-3p	340485	ACER2	NM_001010887	Targetscan
hsa-miR-18a-5p	340485	ACER2	AF370405	Miranda
hsa-miR-196b-5p	340485	ACER2	NM_001010887	Miranda
hsa-miR-20a-3p	340485	ACER2	NM_001010887	Miranda
hsa-miR-20a-5p	340485	ACER2	NM_001010887	Miranda
hsa-miR-218-5p	340485	ACER2	AF370405	Miranda
hsa-miR-218-5p	340485	ACER2	NM_001010887	Miranda
hsa-miR-218-5p	340485	ACER2	NM_001010887	Targetscan
hsa-miR-223-3p	340485	ACER2	NM_001010887	Targetscan
hsa-let-7e-5p	55331	ACER3	AK308856	Miranda
hsa-let-7e-5p	55331	ACER3	NM_018367	Miranda
hsa-miR-1	55331	ACER3	AK295327	Miranda
hsa-miR-1	55331	ACER3	NM_018367	Targetscan
hsa-miR-125b-5p	55331	ACER3	NM_018367	Eimmo
hsa-miR-130a-3p	55331	ACER3	AK002100	Miranda
hsa-miR-130a-3p	55331	ACER3	NM_018367	Miranda
hsa-miR-135b-5p	55331	ACER3	NM_018367	Miranda
hsa-miR-146a-5p	55331	ACER3	AK002100	Miranda
hsa-miR-146a-5p	55331	ACER3	AK308856	Miranda
hsa-miR-146a-5p	55331	ACER3	NM_018367	Miranda
hsa-miR-146a-5p	55331	ACER3	NM_018367	Targetscan
hsa-miR-17-3p	55331	ACER3	AK295327	Miranda
hsa-miR-181a-3p	55331	ACER3	AK002100	Miranda
hsa-miR-181a-3p	55331	ACER3	AK308856	Miranda
hsa-miR-181a-3p	55331	ACER3	NM_018367	Miranda
hsa-miR-181a-3p	55331	ACER3	NM_018367	Eimmo
hsa-miR-181a-3p	55331	ACER3	NM_018367	Targetscan
hsa-miR-18a-5p	55331	ACER3	NM_018367	Targetscan
hsa-miR-195-5p	55331	ACER3	NM_018367	Miranda
hsa-miR-196b-5p	55331	ACER3	AK308856	Miranda
hsa-miR-20a-3p	55331	ACER3	AK295327	Miranda
hsa-miR-20a-3p	55331	ACER3	NM_018367	mirDB
hsa-miR-20a-5p	55331	ACER3	AK295327	Miranda
hsa-miR-218-5p	55331	ACER3	NM_018367	Targetscan
hsa-miR-223-3p	55331	ACER3	AK308856	Miranda
hsa-miR-31-3p	55331	ACER3	NM_018367	Targetscan
hsa-miR-31-5p	55331	ACER3	NM_018367	Targetscan
hsa-miR-340-5p	55331	ACER3	AK002100	Miranda
hsa-miR-340-5p	55331	ACER3	AK295327	Miranda
hsa-miR-340-5p	55331	ACER3	NM_018367	Miranda
hsa-miR-340-5p	55331	ACER3	NM_018367	Eimmo
hsa-miR-340-5p	55331	ACER3	NM_018367	Targetscan
hsa-miR-497-5p	55331	ACER3	NM_018367	Miranda
hsa-miR-92a-3p	55331	ACER3	AK308856	Miranda
hsa-miR-1	43	ACHE	NM_015831	Targetscan
hsa-miR-1	43	ACHE	NM_000665	Targetscan
hsa-miR-125b-5p	43	ACHE	NM_015831	Miranda
hsa-miR-125b-5p	43	ACHE	NM_015831	Eimmo
hsa-miR-130a-3p	43	ACHE	NM_015831	Eimmo
hsa-miR-31-3p	43	ACHE	NM_015831	Miranda
hsa-miR-31-3p	43	ACHE	NM_015831	Targetscan
hsa-miR-31-5p	43	ACHE	NM_015831	Miranda
hsa-miR-31-5p	43	ACHE	NM_015831	Targetscan
hsa-miR-340-5p	43	ACHE	NM_015831	Eimmo
hsa-miR-340-5p	43	ACHE	NM_015831	Targetscan
hsa-miR-513a-5p	43	ACHE	NM_015831	Eimmo
hsa-miR-513a-5p	43	ACHE	NM_015831	Pictar
hsa-miR-513a-5p	43	ACHE	NM_000665	Pictar
hsa-miR-513a-5p	43	ACHE	NM_001282449	Pictar
hsa-miR-513a-5p	43	ACHE	NM_015831	PITA
hsa-miR-1	22985	ACIN1	NM_014977	Targetscan
hsa-miR-1	22985	ACIN1	NM_001164817	Targetscan
hsa-miR-1	22985	ACIN1	NM_001164816	Targetscan
hsa-miR-1	22985	ACIN1	NM_001164815	Targetscan
hsa-miR-1	22985	ACIN1	NM_001164814	Targetscan
hsa-miR-17-3p	22985	ACIN1	NM_014977	Miranda
hsa-miR-17-3p	22985	ACIN1	NM_014977	Targetscan
hsa-miR-17-3p	22985	ACIN1	NM_001164817	Targetscan
hsa-miR-17-3p	22985	ACIN1	NM_001164816	Targetscan
hsa-miR-17-3p	22985	ACIN1	NM_001164815	Targetscan
hsa-miR-17-3p	22985	ACIN1	NM_001164814	Targetscan
hsa-miR-18a-5p	22985	ACIN1	NM_014977	Miranda
hsa-miR-20a-3p	22985	ACIN1	NM_014977	Miranda
hsa-miR-20a-3p	22985	ACIN1	NM_001164816	Eimmo
hsa-miR-20a-3p	22985	ACIN1	NM_001164815	Eimmo
hsa-miR-20a-3p	22985	ACIN1	NM_001164817	Eimmo
hsa-miR-20a-3p	22985	ACIN1	NM_014977	Eimmo
hsa-miR-20a-3p	22985	ACIN1	NM_001164814	Eimmo
hsa-miR-20a-5p	22985	ACIN1	NM_014977	Miranda
hsa-miR-20a-5p	22985	ACIN1	NM_001164816	Eimmo
[truncated: 26,446 more rows]

## Sheet: CD56dim
Target genes predicted for miRNAs upregulated on CD56dim
miRNA name	Gene ID	Gene Symbol	Transcript ID	Software
hsa-miR-873-5p	1	A1BG	NM_130786	Targetscan
hsa-miR-876-3p	1	A1BG	NM_130786	Targetscan
hsa-miR-876-5p	1	A1BG	NM_130786	Targetscan
hsa-miR-29c-5p	9	NAT1	NM_001160176	Miranda
hsa-miR-32-5p	9	NAT1	NM_000662	Targetscan
hsa-miR-32-5p	9	NAT1	NM_001160175	Targetscan
hsa-miR-32-5p	9	NAT1	NM_001160179	Targetscan
hsa-miR-32-5p	9	NAT1	NM_001160173	Targetscan
hsa-miR-32-5p	9	NAT1	NM_001160172	Targetscan
hsa-miR-32-5p	9	NAT1	NM_001160174	Targetscan
hsa-miR-32-5p	9	NAT1	NM_001160171	Targetscan
hsa-miR-32-5p	9	NAT1	NM_001160176	Targetscan
hsa-miR-32-5p	9	NAT1	NM_001160170	Targetscan
hsa-miR-876-3p	9	NAT1	NM_001160174	Targetscan
hsa-miR-876-3p	9	NAT1	NM_001160173	Targetscan
hsa-miR-876-3p	9	NAT1	NM_001160172	Targetscan
hsa-miR-876-3p	9	NAT1	NM_001160170	Targetscan
hsa-miR-876-3p	9	NAT1	NM_001160171	Targetscan
hsa-miR-876-3p	9	NAT1	NM_001160179	Targetscan
hsa-miR-876-3p	9	NAT1	NM_001160176	Targetscan
hsa-miR-876-3p	9	NAT1	NM_001160175	Targetscan
hsa-miR-876-3p	9	NAT1	NM_000662	Targetscan
hsa-miR-876-5p	9	NAT1	NM_001160176	Miranda
hsa-miR-876-5p	9	NAT1	NM_001160174	Targetscan
hsa-miR-876-5p	9	NAT1	NM_001160173	Targetscan
hsa-miR-876-5p	9	NAT1	NM_001160172	Targetscan
hsa-miR-876-5p	9	NAT1	NM_001160170	Targetscan
hsa-miR-876-5p	9	NAT1	NM_001160171	Targetscan
hsa-miR-876-5p	9	NAT1	NM_001160179	Targetscan
hsa-miR-876-5p	9	NAT1	NM_001160176	Targetscan
hsa-miR-876-5p	9	NAT1	NM_001160175	Targetscan
hsa-miR-876-5p	9	NAT1	NM_000662	Targetscan
hsa-miR-505-3p	10	NAT2	NM_000015	Miranda
hsa-miR-505-5p	10	NAT2	NM_000015	Miranda
hsa-miR-532-5p	10	NAT2	NM_000015	mirDB
hsa-miR-135a-3p	12	SERPINA3	AB209060	Miranda
hsa-miR-33a-5p	12	SERPINA3	NM_001085	Miranda
hsa-miR-33a-5p	12	SERPINA3	NM_001085	Targetscan
hsa-miR-132-3p	13	AADAC	NM_001086	Miranda
hsa-miR-132-3p	13	AADAC	NM_001086	Targetscan
hsa-miR-32-5p	14	AAMP	NM_001087	Targetscan
hsa-miR-362-3p	14	AAMP	NM_001087	Miranda
hsa-miR-362-3p	14	AAMP	CR626270	Miranda
hsa-miR-362-3p	14	AAMP	NM_001087	PITA
hsa-miR-32-5p	15	AANAT	NM_001166579	Targetscan
hsa-miR-32-5p	15	AANAT	NM_001088	Targetscan
hsa-miR-1271-5p	18	ABAT	NM_020686	Miranda
hsa-miR-1271-5p	18	ABAT	NM_000663	Eimmo
hsa-miR-1271-5p	18	ABAT	NM_001127448	Eimmo
hsa-miR-1271-5p	18	ABAT	NM_020686	Eimmo
hsa-miR-1271-5p	18	ABAT	NM_000663;NM_020686	PITA
hsa-miR-135a-3p	18	ABAT	NM_020686	Miranda
hsa-miR-135a-3p	18	ABAT	NM_000663	Eimmo
hsa-miR-135a-3p	18	ABAT	NM_001127448	Eimmo
hsa-miR-135a-3p	18	ABAT	NM_020686	Eimmo
hsa-miR-135a-3p	18	ABAT	NM_020686	Targetscan
hsa-miR-135a-3p	18	ABAT	NM_001127448	Targetscan
hsa-miR-135a-3p	18	ABAT	NM_000663	Targetscan
hsa-miR-200c-3p	18	ABAT	NM_020686	Miranda
hsa-miR-200c-3p	18	ABAT	NM_000663	Eimmo
hsa-miR-200c-3p	18	ABAT	NM_001127448	Eimmo
hsa-miR-200c-3p	18	ABAT	NM_020686	Eimmo
hsa-miR-200c-3p	18	ABAT	NM_000663;NM_020686	PITA
hsa-miR-32-5p	18	ABAT	NM_001127448	Targetscan
hsa-miR-32-5p	18	ABAT	NM_000663	Targetscan
hsa-miR-32-5p	18	ABAT	NM_020686	Targetscan
hsa-miR-33a-5p	18	ABAT	NM_020686	Miranda
hsa-miR-33a-5p	18	ABAT	NM_020686	Targetscan
hsa-miR-33a-5p	18	ABAT	NM_001127448	Targetscan
hsa-miR-33a-5p	18	ABAT	NM_000663	Targetscan
hsa-miR-373-5p	18	ABAT	NM_020686	Miranda
hsa-miR-505-3p	18	ABAT	NM_020686	Miranda
hsa-miR-505-3p	18	ABAT	NM_001127448	Targetscan
hsa-miR-505-3p	18	ABAT	NM_000663	Targetscan
hsa-miR-505-3p	18	ABAT	NM_020686	Targetscan
hsa-miR-505-3p	18	ABAT	NM_000663;NM_020686	PITA
hsa-miR-505-5p	18	ABAT	NM_020686	Miranda
hsa-miR-505-5p	18	ABAT	NM_001127448	Targetscan
hsa-miR-505-5p	18	ABAT	NM_000663	Targetscan
hsa-miR-505-5p	18	ABAT	NM_020686	Targetscan
hsa-miR-505-5p	18	ABAT	NM_000663;NM_020686	PITA
hsa-miR-7-5p	18	ABAT	NM_001127448	Targetscan
hsa-miR-7-5p	18	ABAT	NM_000663	Targetscan
hsa-miR-7-5p	18	ABAT	NM_020686	Targetscan
hsa-miR-873-5p	18	ABAT	NM_020686	Miranda
hsa-miR-873-5p	18	ABAT	NM_000663	Eimmo
hsa-miR-873-5p	18	ABAT	NM_001127448	Eimmo
hsa-miR-873-5p	18	ABAT	NM_020686	Eimmo
hsa-miR-873-5p	18	ABAT	NM_000663	mirDB
hsa-miR-873-5p	18	ABAT	NM_020686	mirDB
hsa-miR-873-5p	18	ABAT	NM_001127448	mirDB
hsa-miR-873-5p	18	ABAT	NM_000663	Targetscan
hsa-miR-873-5p	18	ABAT	NM_001127448	Targetscan
hsa-miR-873-5p	18	ABAT	NM_020686	Targetscan
hsa-miR-10a-5p	19	ABCA1	NM_005502	Targetscan
hsa-miR-1271-5p	19	ABCA1	NM_005502	Miranda
hsa-miR-1271-5p	19	ABCA1	NM_005502	Eimmo
hsa-miR-1271-5p	19	ABCA1	NM_005502	Pictar
hsa-miR-1271-5p	19	ABCA1	NM_005502	PITA
hsa-miR-132-3p	19	ABCA1	NM_005502	Targetscan
hsa-miR-135a-3p	19	ABCA1	NM_005502	Miranda
hsa-miR-135a-3p	19	ABCA1	NM_005502	Eimmo
hsa-miR-135a-3p	19	ABCA1	NM_005502	Targetscan
hsa-miR-135a-3p	19	ABCA1	NM_005502	PITA
hsa-miR-152	19	ABCA1	NM_005502	Miranda
hsa-miR-152	19	ABCA1	NM_005502	Eimmo
hsa-miR-152	19	ABCA1	NM_005502	PITA
hsa-miR-200c-3p	19	ABCA1	NM_005502	Eimmo
hsa-miR-32-5p	19	ABCA1	NM_005502	Targetscan
hsa-miR-33a-5p	19	ABCA1	NM_005502	Miranda
hsa-miR-33a-5p	19	ABCA1	NM_005502	Eimmo
hsa-miR-33a-5p	19	ABCA1	NM_005502	mirDB
hsa-miR-33a-5p	19	ABCA1	NM_005502	Pictar
hsa-miR-33a-5p	19	ABCA1	NM_005502	Targetscan
hsa-miR-33a-5p	19	ABCA1	NM_005502	PITA
hsa-miR-34a-5p	19	ABCA1	NM_005502	Targetscan
hsa-miR-362-3p	19	ABCA1	NM_005502	Miranda
hsa-miR-373-5p	19	ABCA1	NM_005502	Miranda
hsa-miR-373-5p	19	ABCA1	NM_005502	Eimmo
hsa-miR-373-5p	19	ABCA1	NM_005502	PITA
hsa-miR-505-3p	19	ABCA1	NM_005502	Miranda
hsa-miR-505-3p	19	ABCA1	NM_005502	Targetscan
hsa-miR-505-5p	19	ABCA1	NM_005502	Miranda
hsa-miR-505-5p	19	ABCA1	NM_005502	Targetscan
hsa-miR-7-5p	19	ABCA1	NM_005502	Targetscan
hsa-miR-873-5p	19	ABCA1	NM_005502	Miranda
hsa-miR-873-5p	19	ABCA1	NM_005502	Targetscan
hsa-miR-873-5p	19	ABCA1	NM_005502	PITA
hsa-miR-1271-5p	20	ABCA2	NM_001606	Miranda
hsa-miR-1271-5p	20	ABCA2	NM_001606	Eimmo
hsa-miR-1271-5p	20	ABCA2	NM_212533	Eimmo
hsa-miR-135a-3p	20	ABCA2	NM_001606	Targetscan
hsa-miR-135a-3p	20	ABCA2	NM_212533	Targetscan
hsa-miR-210	20	ABCA2	NM_001606	Miranda
hsa-miR-32-5p	20	ABCA2	NM_001606	Targetscan
hsa-miR-32-5p	20	ABCA2	NM_212533	Targetscan
hsa-miR-6722-3p	20	ABCA2	NM_212533	Pictar
hsa-miR-6722-3p	20	ABCA2	NM_001606	Pictar
hsa-miR-32-5p	21	ABCA3	NM_001089	Targetscan
hsa-miR-505-3p	21	ABCA3	BC062779	Miranda
hsa-miR-505-5p	21	ABCA3	BC062779	Miranda
hsa-miR-152	22	ABCB7	NM_004299	Miranda
hsa-miR-152	22	ABCB7	NM_004299	Eimmo
hsa-miR-152	22	ABCB7	NM_004299	mirDB
hsa-miR-152	22	ABCB7	NM_004299	PITA
hsa-miR-152	23	ABCF1	NM_001025091	Miranda
hsa-miR-29c-5p	23	ABCF1	NM_001025091	Miranda
hsa-miR-32-5p	23	ABCF1	NM_001025091	Targetscan
hsa-miR-32-5p	23	ABCF1	NM_001090	Targetscan
hsa-miR-362-3p	23	ABCF1	NM_001025091	Miranda
hsa-miR-10a-5p	24	ABCA4	AK310492	Miranda
hsa-miR-29c-5p	24	ABCA4	AK310492	Miranda
hsa-miR-32-5p	24	ABCA4	NM_000350	Targetscan
hsa-miR-33a-5p	24	ABCA4	NM_000350	Targetscan
hsa-miR-873-5p	24	ABCA4	NM_000350	Miranda
hsa-miR-873-5p	24	ABCA4	NM_000350	Targetscan
hsa-miR-10a-5p	25	ABL1	NM_005157	Miranda
hsa-miR-10a-5p	25	ABL1	NM_005157	Targetscan
hsa-miR-10a-5p	25	ABL1	NM_007313	Targetscan
hsa-miR-1227-5p	25	ABL1	NM_005157	Pictar
hsa-miR-1227-5p	25	ABL1	NM_007313	Pictar
hsa-miR-1271-5p	25	ABL1	NM_005157	Miranda
hsa-miR-29c-5p	25	ABL1	NM_005157	Eimmo
hsa-miR-29c-5p	25	ABL1	NM_007313	Eimmo
hsa-miR-32-5p	25	ABL1	NM_005157	Targetscan
hsa-miR-32-5p	25	ABL1	NM_007313	Targetscan
hsa-miR-34a-5p	25	ABL1	NM_005157	Targetscan
hsa-miR-34a-5p	25	ABL1	NM_007313	Targetscan
hsa-miR-7-5p	25	ABL1	NM_005157	Targetscan
hsa-miR-7-5p	25	ABL1	NM_007313	Targetscan
hsa-miR-873-5p	25	ABL1	NM_005157	Targetscan
hsa-miR-873-5p	25	ABL1	NM_007313	Targetscan
hsa-miR-10a-5p	27	ABL2	NM_001168239	Targetscan
hsa-miR-10a-5p	27	ABL2	NM_001168238	Targetscan
hsa-miR-10a-5p	27	ABL2	NM_001168237	Targetscan
hsa-miR-10a-5p	27	ABL2	NM_001136000	Targetscan
hsa-miR-10a-5p	27	ABL2	NM_005158	Targetscan
hsa-miR-10a-5p	27	ABL2	NM_001168236	Targetscan
hsa-miR-10a-5p	27	ABL2	NM_007314	Targetscan
hsa-miR-132-3p	27	ABL2	NM_001136000	Targetscan
hsa-miR-132-3p	27	ABL2	NM_001168238	Targetscan
hsa-miR-132-3p	27	ABL2	NM_001168239	Targetscan
hsa-miR-132-3p	27	ABL2	NM_001168237	Targetscan
hsa-miR-132-3p	27	ABL2	NM_001168236	Targetscan
hsa-miR-132-3p	27	ABL2	NM_007314	Targetscan
hsa-miR-132-3p	27	ABL2	NM_005158	Targetscan
hsa-miR-181d	27	ABL2	NM_001136000	Eimmo
hsa-miR-181d	27	ABL2	NM_001168237	Eimmo
hsa-miR-181d	27	ABL2	NM_005158	Eimmo
hsa-miR-181d	27	ABL2	NM_001168238	Eimmo
hsa-miR-181d	27	ABL2	NM_001168239	Eimmo
hsa-miR-181d	27	ABL2	NM_001168236	Eimmo
hsa-miR-181d	27	ABL2	NM_007314	Eimmo
hsa-miR-200c-3p	27	ABL2	AK225255	Miranda
hsa-miR-29c-5p	27	ABL2	NM_001136000	Eimmo
hsa-miR-29c-5p	27	ABL2	NM_001168237	Eimmo
hsa-miR-29c-5p	27	ABL2	NM_005158	Eimmo
hsa-miR-29c-5p	27	ABL2	NM_001168238	Eimmo
hsa-miR-29c-5p	27	ABL2	NM_001168239	Eimmo
hsa-miR-29c-5p	27	ABL2	NM_001168236	Eimmo
hsa-miR-29c-5p	27	ABL2	NM_007314	Eimmo
hsa-miR-32-5p	27	ABL2	NM_001136000	Eimmo
hsa-miR-32-5p	27	ABL2	NM_001168237	Eimmo
hsa-miR-32-5p	27	ABL2	NM_005158	Eimmo
hsa-miR-32-5p	27	ABL2	NM_001168238	Eimmo
hsa-miR-32-5p	27	ABL2	NM_001168239	Eimmo
hsa-miR-32-5p	27	ABL2	NM_001168236	Eimmo
hsa-miR-32-5p	27	ABL2	NM_007314	Eimmo
hsa-miR-32-5p	27	ABL2	NM_005158	Targetscan
hsa-miR-32-5p	27	ABL2	NM_007314	Targetscan
hsa-miR-32-5p	27	ABL2	NM_001136000	Targetscan
hsa-miR-32-5p	27	ABL2	NM_001168237	Targetscan
hsa-miR-32-5p	27	ABL2	NM_001168239	Targetscan
hsa-miR-32-5p	27	ABL2	NM_001168238	Targetscan
hsa-miR-32-5p	27	ABL2	NM_001168236	Targetscan
hsa-miR-33a-5p	27	ABL2	NM_001168236	Targetscan
hsa-miR-33a-5p	27	ABL2	NM_001136000	Targetscan
hsa-miR-33a-5p	27	ABL2	NM_001168238	Targetscan
hsa-miR-33a-5p	27	ABL2	NM_001168239	Targetscan
hsa-miR-33a-5p	27	ABL2	NM_001168237	Targetscan
hsa-miR-33a-5p	27	ABL2	NM_005158	Targetscan
hsa-miR-33a-5p	27	ABL2	NM_007314	Targetscan
hsa-miR-34a-5p	27	ABL2	NM_005158	Targetscan
hsa-miR-34a-5p	27	ABL2	NM_007314	Targetscan
hsa-miR-34a-5p	27	ABL2	NM_001168238	Targetscan
hsa-miR-34a-5p	27	ABL2	NM_001168236	Targetscan
hsa-miR-34a-5p	27	ABL2	NM_001168237	Targetscan
hsa-miR-34a-5p	27	ABL2	NM_001168239	Targetscan
hsa-miR-34a-5p	27	ABL2	NM_001136000	Targetscan
hsa-miR-362-3p	27	ABL2	NM_005158	mirDB
hsa-miR-362-3p	27	ABL2	NM_001168236	mirDB
hsa-miR-362-3p	27	ABL2	NM_001168238	mirDB
hsa-miR-362-3p	27	ABL2	NM_001168237	mirDB
hsa-miR-362-3p	27	ABL2	NM_007314	mirDB
hsa-miR-362-3p	27	ABL2	NM_001168239	mirDB
hsa-miR-362-3p	27	ABL2	NM_001136000	mirDB
hsa-miR-373-5p	27	ABL2	AK225255	Miranda
hsa-miR-373-5p	27	ABL2	NM_001136000	Eimmo
hsa-miR-373-5p	27	ABL2	NM_001168237	Eimmo
hsa-miR-373-5p	27	ABL2	NM_005158	Eimmo
hsa-miR-373-5p	27	ABL2	NM_001168238	Eimmo
hsa-miR-373-5p	27	ABL2	NM_001168239	Eimmo
hsa-miR-373-5p	27	ABL2	NM_001168236	Eimmo
hsa-miR-373-5p	27	ABL2	NM_007314	Eimmo
hsa-miR-373-5p	27	ABL2	NM_005158	mirDB
hsa-miR-373-5p	27	ABL2	NM_001168238	mirDB
hsa-miR-373-5p	27	ABL2	NM_007314	mirDB
hsa-miR-373-5p	27	ABL2	NM_001168239	mirDB
hsa-miR-373-5p	27	ABL2	NM_001136000	mirDB
hsa-miR-373-5p	27	ABL2	NM_001168236	mirDB
hsa-miR-373-5p	27	ABL2	NM_001168237	mirDB
hsa-miR-373-5p	27	ABL2	NM_001100108;NM_005158;NM_007314	PITA
hsa-miR-505-3p	27	ABL2	NM_001168239	Pictar
hsa-miR-505-3p	27	ABL2	NM_001168237	Pictar
hsa-miR-505-3p	27	ABL2	NM_001168236	Pictar
hsa-miR-505-3p	27	ABL2	NM_007314	Pictar
hsa-miR-505-3p	27	ABL2	NM_001168238	Pictar
hsa-miR-505-3p	27	ABL2	NM_005158	Pictar
hsa-miR-505-3p	27	ABL2	NM_001136000	Pictar
hsa-miR-505-3p	27	ABL2	NM_001168237	Targetscan
hsa-miR-505-3p	27	ABL2	NM_001136000	Targetscan
hsa-miR-505-3p	27	ABL2	NM_001168236	Targetscan
hsa-miR-505-3p	27	ABL2	NM_005158	Targetscan
hsa-miR-505-3p	27	ABL2	NM_001168239	Targetscan
hsa-miR-505-3p	27	ABL2	NM_001168238	Targetscan
hsa-miR-505-3p	27	ABL2	NM_007314	Targetscan
hsa-miR-505-5p	27	ABL2	NM_001168237	Targetscan
hsa-miR-505-5p	27	ABL2	NM_001136000	Targetscan
hsa-miR-505-5p	27	ABL2	NM_001168236	Targetscan
hsa-miR-505-5p	27	ABL2	NM_005158	Targetscan
hsa-miR-505-5p	27	ABL2	NM_001168239	Targetscan
hsa-miR-505-5p	27	ABL2	NM_001168238	Targetscan
hsa-miR-505-5p	27	ABL2	NM_007314	Targetscan
hsa-miR-7-5p	27	ABL2	NM_001136000	Eimmo
hsa-miR-7-5p	27	ABL2	NM_001168237	Eimmo
hsa-miR-7-5p	27	ABL2	NM_005158	Eimmo
hsa-miR-7-5p	27	ABL2	NM_001168238	Eimmo
hsa-miR-7-5p	27	ABL2	NM_001168239	Eimmo
hsa-miR-7-5p	27	ABL2	NM_001168236	Eimmo
hsa-miR-7-5p	27	ABL2	NM_007314	Eimmo
hsa-miR-7-5p	27	ABL2	NM_007314	Targetscan
hsa-miR-7-5p	27	ABL2	NM_005158	Targetscan
hsa-miR-7-5p	27	ABL2	NM_001136000	Targetscan
hsa-miR-7-5p	27	ABL2	NM_001168238	Targetscan
hsa-miR-7-5p	27	ABL2	NM_001168236	Targetscan
hsa-miR-7-5p	27	ABL2	NM_001168239	Targetscan
hsa-miR-7-5p	27	ABL2	NM_001168237	Targetscan
hsa-miR-873-5p	27	ABL2	NM_001136000	Eimmo
hsa-miR-873-5p	27	ABL2	NM_001168237	Eimmo
hsa-miR-873-5p	27	ABL2	NM_005158	Eimmo
hsa-miR-873-5p	27	ABL2	NM_001168238	Eimmo
hsa-miR-873-5p	27	ABL2	NM_001168239	Eimmo
hsa-miR-873-5p	27	ABL2	NM_001168236	Eimmo
hsa-miR-873-5p	27	ABL2	NM_007314	Eimmo
hsa-miR-873-5p	27	ABL2	NM_005158	Targetscan
hsa-miR-873-5p	27	ABL2	NM_001168239	Targetscan
hsa-miR-873-5p	27	ABL2	NM_001168237	Targetscan
hsa-miR-873-5p	27	ABL2	NM_001168236	Targetscan
hsa-miR-873-5p	27	ABL2	NM_001168238	Targetscan
hsa-miR-873-5p	27	ABL2	NM_007314	Targetscan
hsa-miR-873-5p	27	ABL2	NM_001136000	Targetscan
hsa-miR-132-3p	29	ABR	NM_021962	Miranda
hsa-miR-132-3p	29	ABR	NM_001159746	Targetscan
hsa-miR-132-3p	29	ABR	NM_001092	Targetscan
hsa-miR-132-3p	29	ABR	NM_021962	Targetscan
hsa-miR-32-5p	29	ABR	NM_021962	Targetscan
hsa-miR-32-5p	29	ABR	NM_001092	Targetscan
hsa-miR-32-5p	29	ABR	NM_001159746	Targetscan
hsa-miR-33a-5p	29	ABR	NM_021962	Targetscan
hsa-miR-33a-5p	29	ABR	NM_001159746	Targetscan
hsa-miR-33a-5p	29	ABR	NM_001092	Targetscan
hsa-miR-34a-5p	29	ABR	NM_021962	Miranda
hsa-miR-34a-5p	29	ABR	NM_001159746	Eimmo
hsa-miR-34a-5p	29	ABR	NM_021962	Eimmo
hsa-miR-34a-5p	29	ABR	NM_001092	Eimmo
hsa-miR-34a-5p	29	ABR	NM_001282149	Pictar
hsa-miR-34a-5p	29	ABR	NM_001256847	Pictar
hsa-miR-34a-5p	29	ABR	NM_021962	Pictar
hsa-miR-34a-5p	29	ABR	NM_001092	Pictar
hsa-miR-34a-5p	29	ABR	NM_001159746	Pictar
hsa-miR-34a-5p	29	ABR	NM_001092	Targetscan
hsa-miR-34a-5p	29	ABR	NM_001159746	Targetscan
hsa-miR-34a-5p	29	ABR	NM_021962	Targetscan
hsa-miR-34a-5p	29	ABR	NM_001092;NM_021962	PITA
hsa-miR-3652	29	ABR	NM_001282149	Pictar
hsa-miR-3652	29	ABR	NM_001256847	Pictar
hsa-miR-3652	29	ABR	NM_021962	Pictar
hsa-miR-3652	29	ABR	NM_001092	Pictar
hsa-miR-3652	29	ABR	NM_001159746	Pictar
hsa-miR-373-5p	29	ABR	NM_021962	Miranda
hsa-miR-4687-3p	29	ABR	NM_001282149	Pictar
hsa-miR-4687-3p	29	ABR	NM_001256847	Pictar
hsa-miR-4687-3p	29	ABR	NM_021962	Pictar
hsa-miR-4687-3p	29	ABR	NM_001092	Pictar
hsa-miR-4687-3p	29	ABR	NM_001159746	Pictar
hsa-miR-7-5p	29	ABR	NM_021962	Miranda
hsa-miR-7-5p	29	ABR	NM_001092	Targetscan
hsa-miR-7-5p	29	ABR	NM_001159746	Targetscan
hsa-miR-7-5p	29	ABR	NM_021962	Targetscan
hsa-miR-32-5p	30	ACAA1	NM_001607	Miranda
hsa-miR-32-5p	30	ACAA1	CR618847	Miranda
hsa-miR-876-3p	30	ACAA1	NM_001130410	Targetscan
hsa-miR-876-3p	30	ACAA1	NM_001607	Targetscan
hsa-miR-876-5p	30	ACAA1	NM_001607	Miranda
hsa-miR-876-5p	30	ACAA1	CR618847	Miranda
hsa-miR-876-5p	30	ACAA1	NM_001130410	Targetscan
hsa-miR-876-5p	30	ACAA1	NM_001607	Targetscan
hsa-miR-200c-3p	31	ACACA	NM_198834	Miranda
hsa-miR-200c-3p	31	ACACA	NM_198834;NM_198836;NM_198837;NM_198838;NM_198839	PITA
hsa-miR-29c-5p	31	ACACA	NM_198834	Miranda
hsa-miR-29c-5p	31	ACACA	NM_198836	Eimmo
hsa-miR-29c-5p	31	ACACA	NM_198834	Eimmo
hsa-miR-29c-5p	31	ACACA	NM_198839	Eimmo
hsa-miR-29c-5p	31	ACACA	NM_198838	Eimmo
hsa-miR-29c-5p	31	ACACA	NM_198837	Eimmo
hsa-miR-32-5p	31	ACACA	NM_198838	Targetscan
hsa-miR-32-5p	31	ACACA	NM_198837	Targetscan
hsa-miR-32-5p	31	ACACA	NM_198839	Targetscan
hsa-miR-32-5p	31	ACACA	NM_198834	Targetscan
hsa-miR-32-5p	31	ACACA	NM_198836	Targetscan
hsa-miR-4687-3p	31	ACACA	NM_198838	Pictar
hsa-miR-4687-3p	31	ACACA	NM_198837	Pictar
hsa-miR-4687-3p	31	ACACA	NM_198834	Pictar
hsa-miR-4687-3p	31	ACACA	NM_198836	Pictar
hsa-miR-4687-3p	31	ACACA	NM_198839	Pictar
hsa-miR-505-3p	31	ACACA	AK309084	Miranda
hsa-miR-505-5p	31	ACACA	AK309084	Miranda
hsa-miR-7-5p	31	ACACA	NM_198837	Targetscan
hsa-miR-7-5p	31	ACACA	NM_198838	Targetscan
hsa-miR-7-5p	31	ACACA	NM_198834	Targetscan
hsa-miR-7-5p	31	ACACA	NM_198839	Targetscan
hsa-miR-7-5p	31	ACACA	NM_198836	Targetscan
hsa-miR-873-5p	31	ACACA	NM_198838	Targetscan
hsa-miR-873-5p	31	ACACA	NM_198839	Targetscan
hsa-miR-873-5p	31	ACACA	NM_198837	Targetscan
hsa-miR-873-5p	31	ACACA	NM_198834	Targetscan
hsa-miR-873-5p	31	ACACA	NM_198836	Targetscan
hsa-miR-1271-5p	32	ACACB	AK302469	Miranda
hsa-miR-181d	32	ACACB	NM_001093	Miranda
hsa-miR-181d	32	ACACB	AK302469	Miranda
hsa-miR-32-5p	32	ACACB	NM_001093	Targetscan
hsa-miR-33a-5p	32	ACACB	NM_001093	Targetscan
hsa-miR-505-3p	32	ACACB	AK302469	Miranda
hsa-miR-505-5p	32	ACACB	AK302469	Miranda
hsa-miR-7-5p	32	ACACB	NM_001093	Targetscan
hsa-miR-10a-5p	33	ACADL	NM_001608	Miranda
hsa-miR-1271-5p	33	ACADL	NM_001608	Miranda
hsa-miR-135a-3p	33	ACADL	NM_001608	Miranda
hsa-miR-135a-3p	33	ACADL	NM_001608	Targetscan
hsa-miR-181d	33	ACADL	AK296161	Miranda
hsa-miR-29c-5p	33	ACADL	AK296161	Miranda
hsa-miR-32-5p	33	ACADL	NM_001608	Miranda
hsa-miR-32-5p	33	ACADL	NM_001608	mirDB
hsa-miR-33a-5p	33	ACADL	AK296161	Miranda
hsa-miR-7-5p	33	ACADL	NM_001608	Miranda
hsa-miR-876-5p	33	ACADL	AK296161	Miranda
hsa-miR-132-3p	34	ACADM	NM_001127328	Miranda
hsa-miR-132-3p	34	ACADM	AK301039	Miranda
hsa-miR-132-3p	34	ACADM	NM_001127328	Targetscan
hsa-miR-132-3p	34	ACADM	NM_000016	Targetscan
hsa-miR-181d	34	ACADM	AK301039	Miranda
hsa-miR-29c-5p	34	ACADM	AK311022	Miranda
hsa-miR-7-5p	34	ACADM	AK311022	Miranda
hsa-miR-876-5p	34	ACADM	AK311022	Miranda
hsa-miR-876-5p	34	ACADM	NM_001127328	Miranda
hsa-miR-32-5p	35	ACADS	NM_000017	Targetscan
hsa-miR-1299	36	ACADSB	NM_001609	Eimmo
hsa-miR-1299	36	ACADSB	NM_001609	PITA
hsa-miR-132-3p	36	ACADSB	NM_001609	Targetscan
hsa-miR-135a-3p	36	ACADSB	NM_001609	Targetscan
hsa-miR-181a-2-3p	36	ACADSB	NM_001609	mirDB
hsa-miR-200c-3p	36	ACADSB	NM_001609	Miranda
hsa-miR-215	36	ACADSB	NM_001609	Miranda
hsa-miR-32-5p	36	ACADSB	NM_001609	Targetscan
hsa-miR-33a-5p	36	ACADSB	NM_001609	Targetscan
hsa-miR-34a-5p	36	ACADSB	NM_001609	Targetscan
hsa-miR-373-5p	36	ACADSB	NM_001609	Eimmo
hsa-miR-505-3p	36	ACADSB	NM_001609	Targetscan
hsa-miR-505-5p	36	ACADSB	NM_001609	Targetscan
hsa-miR-7-5p	36	ACADSB	NM_001609	Miranda
hsa-miR-7-5p	36	ACADSB	NM_001609	Targetscan
hsa-miR-34a-5p	37	ACADVL	AK302653	Miranda
hsa-miR-373-5p	37	ACADVL	NM_000018	Miranda
hsa-miR-1271-5p	38	ACAT1	BC063853	Miranda
hsa-miR-132-3p	38	ACAT1	BC010942	Miranda
hsa-miR-132-3p	38	ACAT1	BC063853	Miranda
hsa-miR-34a-5p	38	ACAT1	BC010942	Miranda
hsa-miR-373-5p	38	ACAT1	BC063853	Miranda
hsa-miR-505-3p	38	ACAT1	BC010942	Miranda
hsa-miR-505-5p	38	ACAT1	BC010942	Miranda
hsa-miR-876-3p	38	ACAT1	NM_000019	Targetscan
hsa-miR-876-5p	38	ACAT1	NM_000019	Miranda
hsa-miR-876-5p	38	ACAT1	NM_000019	Targetscan
hsa-miR-33a-5p	39	ACAT2	NM_005891	Miranda
hsa-miR-7-5p	39	ACAT2	NM_005891	Targetscan
hsa-miR-34a-5p	40	ACCN1	NM_001094	Miranda
hsa-miR-34a-5p	40	ACCN1	NM_001094	Targetscan
hsa-miR-34a-5p	40	ACCN1	NM_183377	Targetscan
hsa-miR-34a-5p	40	ACCN1	NM_001094;NM_183377	PITA
hsa-miR-34a-5p	40	ASIC2	NM_001094	Eimmo
hsa-miR-34a-5p	40	ASIC2	NM_183377	Eimmo
hsa-miR-1227-5p	41	ASIC1	NM_001095	Pictar
hsa-miR-1227-5p	41	ASIC1	NR_046389	Pictar
hsa-miR-1227-5p	41	ASIC1	NM_020039	Pictar
hsa-miR-1227-5p	41	ASIC1	NM_001256830	Pictar
hsa-miR-152	41	ACCN2	NM_020039	Miranda
hsa-miR-152	41	ACCN2	NM_001095;NM_020039	PITA
hsa-miR-29b-1-5p	41	ASIC1	NM_001095	Pictar
hsa-miR-29b-1-5p	41	ASIC1	NR_046389	Pictar
hsa-miR-29b-1-5p	41	ASIC1	NM_020039	Pictar
hsa-miR-29b-1-5p	41	ASIC1	NM_001256830	Pictar
hsa-miR-29c-5p	41	ACCN2	NM_001095;NM_020039	PITA
hsa-miR-29c-5p	41	ASIC1	NM_001095	Eimmo
hsa-miR-29c-5p	41	ASIC1	NM_020039	Eimmo
hsa-miR-32-5p	41	ACCN2	NM_001095	Targetscan
hsa-miR-32-5p	41	ACCN2	NM_020039	Targetscan
hsa-miR-876-3p	41	ACCN2	NM_020039	Targetscan
hsa-miR-876-3p	41	ACCN2	NM_001095	Targetscan
hsa-miR-876-5p	41	ACCN2	NM_020039	Miranda
hsa-miR-876-5p	41	ACCN2	NM_020039	Targetscan
hsa-miR-876-5p	41	ACCN2	NM_001095	Targetscan
hsa-miR-876-5p	41	ACCN2	NM_001095;NM_020039	PITA
hsa-miR-876-5p	41	ASIC1	NM_001095	Eimmo
hsa-miR-876-5p	41	ASIC1	NM_020039	Eimmo
hsa-miR-1227-5p	43	ACHE	NM_015831	Pictar
hsa-miR-1227-5p	43	ACHE	NM_000665	Pictar
hsa-miR-1227-5p	43	ACHE	NM_001282449	Pictar
hsa-miR-132-3p	43	ACHE	NM_015831	Targetscan
hsa-miR-132-3p	43	ACHE	NM_000665	Targetscan
hsa-miR-152	43	ACHE	NM_015831	Miranda
hsa-miR-152	43	ACHE	NM_015831	Eimmo
hsa-miR-152	43	ACHE	NM_015831	PITA
hsa-miR-200c-3p	43	ACHE	NM_015831	Miranda
hsa-miR-4687-3p	43	ACHE	NM_015831	Pictar
hsa-miR-4687-3p	43	ACHE	NM_000665	Pictar
hsa-miR-4687-3p	43	ACHE	NM_001282449	Pictar
hsa-miR-4741	43	ACHE	NM_015831	Pictar
hsa-miR-4741	43	ACHE	NM_000665	Pictar
hsa-miR-4741	43	ACHE	NM_001282449	Pictar
hsa-miR-7-5p	43	ACHE	NM_015831	Miranda
hsa-miR-7-5p	43	ACHE	NM_015831	Targetscan
hsa-miR-181d	47	ACLY	NM_001096	Miranda
hsa-miR-7-5p	47	ACLY	NM_001096	Targetscan
hsa-miR-7-5p	47	ACLY	NM_198830	Targetscan
hsa-miR-1271-5p	48	ACO1	AK308752	Miranda
hsa-miR-1271-5p	48	ACO1	NM_002197	Miranda
hsa-miR-181d	48	ACO1	NM_002197	Miranda
hsa-miR-29c-5p	48	ACO1	AB209480	Miranda
hsa-miR-29c-5p	48	ACO1	NM_002197	Eimmo
hsa-miR-876-5p	48	ACO1	AB209480	Miranda
hsa-miR-876-5p	48	ACO1	NM_002197	Miranda
hsa-miR-132-3p	50	ACO2	NM_001098	Miranda
hsa-miR-132-3p	50	ACO2	NM_001098	Targetscan
hsa-miR-29c-5p	50	ACO2	NM_001098	Miranda
hsa-miR-505-5p	50	ACO2	NM_001098	Pictar
hsa-miR-7-5p	50	ACO2	NM_001098	Miranda
hsa-miR-7-5p	50	ACO2	NM_001098	Targetscan
hsa-miR-10a-5p	51	ACOX1	NM_007292	Targetscan
hsa-miR-10a-5p	51	ACOX1	NM_004035	Targetscan
hsa-miR-10a-5p	51	ACOX1	NM_001185039	Targetscan
hsa-miR-135a-3p	51	ACOX1	NM_004035	Miranda
hsa-miR-135a-3p	51	ACOX1	NM_004035	Targetscan
hsa-miR-135a-3p	51	ACOX1	NM_001185039	Targetscan
hsa-miR-135a-3p	51	ACOX1	NM_007292	Targetscan
hsa-miR-32-5p	51	ACOX1	NM_004035	Miranda
hsa-miR-32-5p	51	ACOX1	NM_004035	Eimmo
hsa-miR-32-5p	51	ACOX1	NM_001185039	Eimmo
hsa-miR-32-5p	51	ACOX1	NM_007292	Eimmo
hsa-miR-32-5p	51	ACOX1	NM_001185039	Targetscan
hsa-miR-32-5p	51	ACOX1	NM_007292	Targetscan
hsa-miR-32-5p	51	ACOX1	NM_004035	Targetscan
hsa-miR-32-5p	51	ACOX1	NM_004035;NM_007292	PITA
hsa-miR-33a-5p	51	ACOX1	NM_007292	Targetscan
hsa-miR-33a-5p	51	ACOX1	NM_001185039	Targetscan
hsa-miR-33a-5p	51	ACOX1	NM_004035	Targetscan
hsa-miR-34a-5p	51	ACOX1	NM_001185039	Targetscan
hsa-miR-34a-5p	51	ACOX1	NM_007292	Targetscan
hsa-miR-34a-5p	51	ACOX1	NM_004035	Targetscan
hsa-miR-373-5p	51	ACOX1	NM_004035	Miranda
hsa-miR-373-5p	51	ACOX1	NM_004035	mirDB
hsa-miR-373-5p	51	ACOX1	NM_007292	mirDB
hsa-miR-373-5p	51	ACOX1	NM_001185039	mirDB
hsa-miR-505-3p	51	ACOX1	NM_004035	Miranda
hsa-miR-505-3p	51	ACOX1	NM_007292	Targetscan
hsa-miR-505-3p	51	ACOX1	NM_004035	Targetscan
hsa-miR-505-3p	51	ACOX1	NM_001185039	Targetscan
hsa-miR-505-5p	51	ACOX1	NM_004035	Miranda
hsa-miR-505-5p	51	ACOX1	NM_007292	Targetscan
hsa-miR-505-5p	51	ACOX1	NM_004035	Targetscan
hsa-miR-505-5p	51	ACOX1	NM_001185039	Targetscan
hsa-miR-7-5p	51	ACOX1	NM_004035	Targetscan
hsa-miR-7-5p	51	ACOX1	NM_001185039	Targetscan
hsa-miR-7-5p	51	ACOX1	NM_007292	Targetscan
hsa-miR-132-3p	52	ACP1	NM_004300	Miranda
hsa-miR-132-3p	52	ACP1	NR_024080	Miranda
hsa-miR-132-3p	52	ACP1	NM_004300	Targetscan
hsa-miR-132-3p	52	ACP1	NM_007099	Targetscan
hsa-miR-152	52	ACP1	NM_004300	Miranda
hsa-miR-152	52	ACP1	NR_024080	Miranda
hsa-miR-181d	52	ACP1	NM_001040649	Miranda
hsa-miR-181d	52	ACP1	BC020699	Miranda
hsa-miR-32-5p	52	ACP1	NM_001040649	Targetscan
hsa-miR-32-5p	52	ACP1	NM_004300	Targetscan
hsa-miR-32-5p	52	ACP1	NM_007099	Targetscan
hsa-miR-33a-5p	52	ACP1	BC020699	Miranda
hsa-miR-362-3p	52	ACP1	NM_001040649	Miranda
hsa-miR-362-3p	52	ACP1	NM_004300	Miranda
hsa-miR-362-3p	52	ACP1	NR_024080	Miranda
hsa-miR-362-3p	52	ACP1	BC020699	Miranda
hsa-miR-4741	52	ACP1	NM_001040649	Pictar
hsa-miR-4741	52	ACP1	NM_007099	Pictar
hsa-miR-4741	52	ACP1	NR_024080	Pictar
hsa-miR-4741	52	ACP1	NM_004300	Pictar
hsa-miR-132-3p	53	ACP2	NM_001610	Miranda
hsa-miR-132-3p	53	ACP2	NM_001610	Targetscan
hsa-miR-132-3p	53	ACP2	NM_001610	PITA
hsa-miR-181d	53	ACP2	NM_001610	Miranda
hsa-miR-29c-5p	53	ACP2	NM_001610	Miranda
hsa-miR-32-5p	53	ACP2	NM_001610	Targetscan
hsa-miR-3652	53	ACP2	NM_001610	Pictar
hsa-miR-181d	54	ACP5	NM_001111036	Miranda
hsa-miR-373-5p	54	ACP5	NM_001111036	Miranda
hsa-miR-10a-5p	55	ACPP	NM_001134194	Miranda
hsa-miR-10a-5p	55	ACPP	NM_001134194	Targetscan
hsa-miR-1271-5p	55	ACPP	AB102888	Miranda
hsa-miR-135a-3p	55	ACPP	NM_001099	Targetscan
hsa-miR-200c-3p	55	ACPP	NM_001134194	Miranda
hsa-miR-215	55	ACPP	AB102888	Miranda
hsa-miR-32-5p	55	ACPP	NM_001099	Targetscan
hsa-miR-32-5p	55	ACPP	NM_001134194	Targetscan
hsa-miR-33a-5p	55	ACPP	NM_001134194	Targetscan
hsa-miR-505-3p	55	ACPP	AB102888	Miranda
hsa-miR-505-3p	55	ACPP	NM_001099	Targetscan
hsa-miR-505-5p	55	ACPP	AB102888	Miranda
hsa-miR-505-5p	55	ACPP	NM_001099	Targetscan
hsa-miR-7-5p	56	ACRV1	NM_001612	Miranda
hsa-miR-7-5p	56	ACRV1	NM_001612	Targetscan
hsa-miR-7-5p	56	ACRV1	NM_020107	Targetscan
hsa-miR-7-5p	56	ACRV1	NM_020108	Targetscan
hsa-miR-7-5p	56	ACRV1	NM_020069	Targetscan
hsa-miR-873-5p	56	ACRV1	NM_001612	Miranda
hsa-miR-873-5p	56	ACRV1	NM_001612	Targetscan
hsa-miR-873-5p	56	ACRV1	NM_020108	Targetscan
hsa-miR-873-5p	56	ACRV1	NM_020107	Targetscan
hsa-miR-873-5p	56	ACRV1	NM_020069	Targetscan
hsa-miR-132-3p	59	ACTA2	NM_001613	Miranda
hsa-miR-181d	59	ACTA2	NM_001613	Miranda
hsa-miR-181d	59	ACTA2	NM_001141945	Eimmo
hsa-miR-181d	59	ACTA2	NM_001613	Eimmo
hsa-miR-33a-5p	60	ACTB	NM_001101	Miranda
hsa-miR-33a-5p	60	ACTB	NM_001101	Targetscan
hsa-miR-7-5p	60	ACTB	NM_001101	Miranda
hsa-miR-132-3p	70	ACTC1	NM_005159	Targetscan
hsa-miR-135a-3p	70	ACTC1	NM_005159	Miranda
hsa-miR-135a-3p	70	ACTC1	NM_005159	Targetscan
hsa-miR-152	70	ACTC1	NM_005159	Miranda
hsa-miR-181d	70	ACTC1	NM_005159	Miranda
hsa-miR-200c-3p	70	ACTC1	NM_005159	Miranda
hsa-miR-200c-3p	70	ACTC1	NM_005159	Eimmo
hsa-miR-200c-3p	70	ACTC1	NM_005159	mirDB
hsa-miR-29b-1-5p	70	ACTC1	NM_005159	mirDB
hsa-miR-29b-1-5p	70	ACTC1	NM_005159	Pictar
hsa-miR-32-5p	70	ACTC1	NM_005159	Miranda
hsa-miR-32-5p	70	ACTC1	NM_005159	Eimmo
hsa-miR-32-5p	70	ACTC1	NM_005159	mirDB
hsa-miR-32-5p	70	ACTC1	NM_005159	Targetscan
hsa-miR-32-5p	70	ACTC1	NM_005159	PITA
hsa-miR-7-5p	70	ACTC1	NM_005159	Miranda
hsa-miR-7-5p	70	ACTC1	NM_005159	Targetscan
hsa-miR-876-3p	70	ACTC1	NM_005159	Targetscan
hsa-miR-876-5p	70	ACTC1	NM_005159	Targetscan
hsa-miR-10a-5p	71	ACTG1	NR_037688	Pictar
hsa-miR-10a-5p	71	ACTG1	NM_001614	Pictar
hsa-miR-10a-5p	71	ACTG1	NM_001199954	Pictar
hsa-miR-10a-5p	71	ACTG1	NM_001199954	Targetscan
hsa-miR-10a-5p	71	ACTG1	NM_001614	Targetscan
hsa-miR-1227-5p	71	ACTG1	NR_037688	Pictar
hsa-miR-1227-5p	71	ACTG1	NM_001614	Pictar
hsa-miR-1227-5p	71	ACTG1	NM_001199954	Pictar
hsa-miR-132-3p	71	ACTG1	NM_001614	Targetscan
hsa-miR-132-3p	71	ACTG1	NM_001199954	Targetscan
hsa-miR-152	71	ACTG1	NM_001614	Miranda
hsa-miR-29c-5p	72	ACTG2	AK310215	Miranda
hsa-miR-32-5p	72	ACTG2	AK310215	Miranda
hsa-miR-210	81	ACTN4	NM_004924	Miranda
hsa-miR-32-5p	81	ACTN4	NM_004924	Targetscan
hsa-miR-7-5p	81	ACTN4	NM_004924	Miranda
hsa-miR-7-5p	81	ACTN4	NM_004924	Targetscan
hsa-miR-876-3p	81	ACTN4	NM_004924	Pictar
hsa-miR-876-3p	81	ACTN4	NM_004924	PITA
hsa-miR-876-5p	81	ACTN4	NM_004924	Pictar
hsa-miR-152	86	ACTL6A	NM_004301	Miranda
hsa-miR-181d	86	ACTL6A	NM_004301	Miranda
hsa-miR-181d	86	ACTL6A	NM_178042	Eimmo
hsa-miR-181d	86	ACTL6A	NM_177989	Eimmo
hsa-miR-181d	86	ACTL6A	NM_004301	Eimmo
hsa-miR-32-5p	86	ACTL6A	NM_004301	Targetscan
hsa-miR-32-5p	86	ACTL6A	NM_178042	Targetscan
hsa-miR-32-5p	86	ACTL6A	NM_177989	Targetscan
hsa-miR-33a-5p	86	ACTL6A	NM_004301	Miranda
hsa-miR-373-5p	86	ACTL6A	NM_004301	Miranda
hsa-miR-200c-3p	87	ACTN1	NM_001130004	Miranda
hsa-miR-1299	88	ACTN2	NM_001103	Eimmo
hsa-miR-181d	88	ACTN2	NM_001103	Miranda
hsa-miR-181d	88	ACTN2	NM_001103	Eimmo
hsa-miR-32-5p	88	ACTN2	NM_001103	Targetscan
hsa-miR-33a-5p	88	ACTN2	NM_001103	Targetscan
hsa-miR-373-5p	88	ACTN2	NM_001103	Miranda
hsa-miR-505-3p	88	ACTN2	NM_001103	Miranda
hsa-miR-505-3p	88	ACTN2	NM_001103	Targetscan
hsa-miR-505-3p	88	ACTN2	NM_001103	PITA
hsa-miR-505-5p	88	ACTN2	NM_001103	Miranda
hsa-miR-505-5p	88	ACTN2	NM_001103	Targetscan
hsa-miR-505-5p	88	ACTN2	NM_001103	PITA
hsa-miR-873-5p	88	ACTN2	NM_001103	Targetscan
hsa-miR-29c-5p	89	ACTN3	AK303044	Miranda
hsa-miR-32-5p	89	ACTN3	NM_001104	Targetscan
hsa-miR-34a-5p	89	ACTN3	AK303044	Miranda
hsa-miR-505-3p	89	ACTN3	AK303044	Miranda
hsa-miR-505-5p	89	ACTN3	AK303044	Miranda
hsa-miR-873-5p	89	ACTN3	AK303044	Miranda
hsa-miR-1271-5p	90	ACVR1	NM_001111067	Miranda
hsa-miR-132-3p	90	ACVR1	NM_001111067	Miranda
hsa-miR-132-3p	90	ACVR1	NM_001111067	Targetscan
hsa-miR-132-3p	90	ACVR1	NM_001105	Targetscan
hsa-miR-152	90	ACVR1	NM_001111067	Miranda
hsa-miR-152	90	ACVR1	NM_001105	Eimmo
hsa-miR-152	90	ACVR1	NM_001111067	Eimmo
hsa-miR-152	90	ACVR1	NM_001111067	mirDB
hsa-miR-152	90	ACVR1	NM_001105	mirDB
hsa-miR-152	90	ACVR1	NM_001105	Pictar
hsa-miR-152	90	ACVR1	NM_001111067	Pictar
hsa-miR-152	90	ACVR1	NM_001105	PITA
hsa-miR-181d	90	ACVR1	NM_001111067	Miranda
hsa-miR-215	90	ACVR1	NM_001111067	Miranda
hsa-miR-29c-5p	90	ACVR1	NM_001111067	Miranda
hsa-miR-32-5p	90	ACVR1	NM_001111067	Miranda
hsa-miR-32-5p	90	ACVR1	NM_001105	Targetscan
hsa-miR-32-5p	90	ACVR1	NM_001111067	Targetscan
hsa-miR-33a-5p	90	ACVR1	NM_001105	Targetscan
hsa-miR-33a-5p	90	ACVR1	NM_001111067	Targetscan
hsa-miR-34a-5p	90	ACVR1	NM_001111067	Miranda
hsa-miR-362-3p	90	ACVR1	NM_001111067	Miranda
hsa-miR-373-5p	90	ACVR1	NM_001111067	Miranda
hsa-miR-876-3p	90	ACVR1	NM_001105	Pictar
hsa-miR-876-3p	90	ACVR1	NM_001111067	Pictar
hsa-miR-876-3p	90	ACVR1	NM_001111067	Targetscan
hsa-miR-876-3p	90	ACVR1	NM_001105	Targetscan
hsa-miR-876-3p	90	ACVR1	NM_001105	PITA
hsa-miR-876-5p	90	ACVR1	NM_001111067	Miranda
hsa-miR-876-5p	90	ACVR1	NM_001105	Eimmo
hsa-miR-876-5p	90	ACVR1	NM_001111067	Eimmo
hsa-miR-876-5p	90	ACVR1	NM_001111067	Targetscan
hsa-miR-876-5p	90	ACVR1	NM_001105	Targetscan
hsa-miR-876-5p	90	ACVR1	NM_001105	PITA
hsa-miR-1227-5p	91	ACVR1B	NM_004302	Pictar
hsa-miR-1227-5p	91	ACVR1B	NM_020327	Pictar
hsa-miR-1227-5p	91	ACVR1B	NM_020328	Pictar
hsa-miR-132-3p	91	ACVR1B	NM_004302	Miranda
hsa-miR-135a-3p	91	ACVR1B	NM_004302	Miranda
hsa-miR-135a-3p	91	ACVR1B	NM_020328	Eimmo
hsa-miR-135a-3p	91	ACVR1B	NM_004302	Eimmo
hsa-miR-135a-3p	91	ACVR1B	NM_020327	Eimmo
hsa-miR-135a-3p	91	ACVR1B	NM_020327	Targetscan
hsa-miR-135a-3p	91	ACVR1B	NM_004302	Targetscan
hsa-miR-135a-3p	91	ACVR1B	NM_020328	Targetscan
hsa-miR-135a-3p	91	ACVR1B	NM_004302	PITA
hsa-miR-152	91	ACVR1B	NM_004302	Miranda
hsa-miR-200c-3p	91	ACVR1B	NM_004302	Miranda
hsa-miR-210	91	ACVR1B	NM_004302	Miranda
hsa-miR-210	91	ACVR1B	NM_020327	Targetscan
hsa-miR-210	91	ACVR1B	NM_004302	Targetscan
hsa-miR-210	91	ACVR1B	NM_020328	Targetscan
hsa-miR-32-5p	91	ACVR1B	NM_020327	Targetscan
hsa-miR-32-5p	91	ACVR1B	NM_020328	Targetscan
hsa-miR-32-5p	91	ACVR1B	NM_004302	Targetscan
hsa-miR-34a-5p	91	ACVR1B	NM_020328	Targetscan
hsa-miR-34a-5p	91	ACVR1B	NM_020327	Targetscan
hsa-miR-34a-5p	91	ACVR1B	NM_004302	Targetscan
hsa-miR-3652	91	ACVR1B	NM_004302	Pictar
hsa-miR-3652	91	ACVR1B	NM_020327	Pictar
hsa-miR-3652	91	ACVR1B	NM_020328	Pictar
hsa-miR-373-5p	91	ACVR1B	NM_004302	Miranda
hsa-miR-7-5p	91	ACVR1B	NM_020327	Targetscan
hsa-miR-7-5p	91	ACVR1B	NM_020328	Targetscan
hsa-miR-7-5p	91	ACVR1B	NM_004302	Targetscan
hsa-miR-876-3p	91	ACVR1B	NM_004302	Targetscan
hsa-miR-876-3p	91	ACVR1B	NM_020327	Targetscan
hsa-miR-876-3p	91	ACVR1B	NM_020328	Targetscan
hsa-miR-876-5p	91	ACVR1B	NM_004302	Miranda
hsa-miR-876-5p	91	ACVR1B	NM_004302	Targetscan
hsa-miR-876-5p	91	ACVR1B	NM_020327	Targetscan
hsa-miR-876-5p	91	ACVR1B	NM_020328	Targetscan
hsa-miR-876-5p	91	ACVR1B	NM_004302	PITA
hsa-miR-10a-5p	92	ACVR2A	NM_001616	Targetscan
hsa-miR-1271-5p	92	ACVR2A	NM_001616	Miranda
hsa-miR-1271-5p	92	ACVR2A	NM_001616	Eimmo
hsa-miR-1271-5p	92	ACVR2A	NM_001616	PITA
hsa-miR-1299	92	ACVR2A	NM_001616	Eimmo
hsa-miR-1299	92	ACVR2A	NM_001616	PITA
hsa-miR-152	92	ACVR2A	NM_001616	Miranda
hsa-miR-181d	92	ACVR2A	NM_001616	Miranda
hsa-miR-181d	92	ACVR2A	NM_001616	Eimmo
hsa-miR-181d	92	ACVR2A	NM_001616	mirDB
hsa-miR-181d	92	ACVR2A	NM_001616	PITA
hsa-miR-200c-3p	92	ACVR2A	NM_001616	Miranda
hsa-miR-200c-3p	92	ACVR2A	NM_001616	Eimmo
hsa-miR-200c-3p	92	ACVR2A	NM_001616	PITA
hsa-miR-215	92	ACVR2A	NM_001616	Miranda
hsa-miR-215	92	ACVR2A	NM_001616	PITA
hsa-miR-29c-5p	92	ACVR2A	NM_001616	Miranda
hsa-miR-29c-5p	92	ACVR2A	NM_001616	Eimmo
hsa-miR-29c-5p	92	ACVR2A	NM_001616	PITA
hsa-miR-7-5p	92	ACVR2A	NM_001616	Targetscan
hsa-miR-873-5p	92	ACVR2A	NM_001616	Targetscan
hsa-miR-876-3p	92	ACVR2A	NM_001616	Targetscan
hsa-miR-876-5p	92	ACVR2A	NM_001616	Miranda
hsa-miR-876-5p	92	ACVR2A	NM_001616	Eimmo
hsa-miR-876-5p	92	ACVR2A	NM_001616	Targetscan
hsa-miR-876-5p	92	ACVR2A	NM_001616	PITA
hsa-miR-10a-5p	93	ACVR2B	NM_001106	Targetscan
hsa-miR-1271-5p	93	ACVR2B	NM_001106	Eimmo
hsa-miR-1299	93	ACVR2B	NM_001106	Eimmo
hsa-miR-132-3p	93	ACVR2B	NM_001106	Eimmo
hsa-miR-132-3p	93	ACVR2B	NM_001106	Targetscan
hsa-miR-132-3p	93	ACVR2B	NM_001106	PITA
hsa-miR-152	93	ACVR2B	NM_001106	Eimmo
hsa-miR-152	93	ACVR2B	NM_001106	PITA
hsa-miR-181d	93	ACVR2B	NM_001106	Eimmo
hsa-miR-181d	93	ACVR2B	NM_001106	mirDB
hsa-miR-181d	93	ACVR2B	NM_001106	PITA
hsa-miR-200c-3p	93	ACVR2B	NM_001106	Eimmo
hsa-miR-200c-3p	93	ACVR2B	NM_001106	PITA
hsa-miR-215	93	ACVR2B	NM_001106	PITA
hsa-miR-29b-1-5p	93	ACVR2B	NM_001106	mirDB
hsa-miR-29c-5p	93	ACVR2B	NM_001106	Eimmo
hsa-miR-29c-5p	93	ACVR2B	NM_001106	PITA
hsa-miR-32-5p	93	ACVR2B	NM_001106	Targetscan
hsa-miR-33a-5p	93	ACVR2B	NM_001106	Targetscan
hsa-miR-34a-5p	93	ACVR2B	NM_001106	Eimmo
hsa-miR-34a-5p	93	ACVR2B	NM_001106	Targetscan
hsa-miR-3652	93	ACVR2B	NM_001106	Pictar
hsa-miR-373-5p	93	ACVR2B	NM_001106	Eimmo
hsa-miR-505-3p	93	ACVR2B	NM_001106	Targetscan
hsa-miR-505-5p	93	ACVR2B	NM_001106	Targetscan
hsa-miR-7-5p	93	ACVR2B	NM_001106	Targetscan
hsa-miR-876-3p	93	ACVR2B	NM_001106	Targetscan
hsa-miR-876-5p	93	ACVR2B	NM_001106	Eimmo
hsa-miR-876-5p	93	ACVR2B	NM_001106	Targetscan
hsa-miR-876-5p	93	ACVR2B	NM_001106	PITA
hsa-miR-10a-5p	94	ACVRL1	NM_001077401	Miranda
hsa-miR-10a-5p	94	ACVRL1	NM_001077401	Targetscan
hsa-miR-10a-5p	94	ACVRL1	NM_000020	Targetscan
hsa-miR-32-5p	94	ACVRL1	NM_001077401	Targetscan
hsa-miR-32-5p	94	ACVRL1	NM_000020	Targetscan
hsa-miR-33a-5p	94	ACVRL1	NM_000020	Targetscan
hsa-miR-33a-5p	94	ACVRL1	NM_001077401	Targetscan
hsa-miR-34a-5p	94	ACVRL1	NM_001077401	Targetscan
hsa-miR-34a-5p	94	ACVRL1	NM_000020	Targetscan
hsa-miR-4687-3p	94	ACVRL1	NM_001077401	Pictar
hsa-miR-4687-3p	94	ACVRL1	NM_000020	Pictar
hsa-miR-7-5p	94	ACVRL1	NM_001077401	Miranda
hsa-miR-7-5p	94	ACVRL1	NM_001077401	Targetscan
hsa-miR-7-5p	94	ACVRL1	NM_000020	Targetscan
hsa-miR-1271-5p	95	ACY1	NM_000666	Miranda
hsa-miR-362-3p	95	ACY1	AK298274	Miranda
hsa-miR-181d	97	ACYP1	NM_203488	Miranda
hsa-miR-181d	97	ACYP1	NM_001107	Miranda
hsa-miR-181d	97	ACYP1	NM_203488	mirDB
hsa-miR-181d	97	ACYP1	NM_001107	mirDB
hsa-miR-33a-5p	97	ACYP1	NM_203488	Miranda
hsa-miR-33a-5p	97	ACYP1	NM_001107	Pictar
hsa-miR-33a-5p	97	ACYP1	NM_203488	Pictar
hsa-miR-362-3p	97	ACYP1	NM_203488	Miranda
hsa-miR-362-3p	97	ACYP1	NM_001107	Miranda
hsa-miR-7-5p	97	ACYP1	NM_203488	Miranda
hsa-miR-132-3p	98	ACYP2	NM_138448	Miranda
hsa-miR-200c-3p	98	ACYP2	NM_138448	Miranda
hsa-miR-505-3p	98	ACYP2	NM_138448	Miranda
hsa-miR-505-5p	98	ACYP2	NM_138448	Miranda
hsa-miR-876-5p	98	ACYP2	NM_138448	Miranda
hsa-miR-135a-3p	100	ADA	NM_000022	Miranda
hsa-miR-29c-5p	100	ADA	NM_000022	Miranda
hsa-miR-29c-5p	100	ADA	NM_000022	Eimmo
hsa-miR-135a-3p	101	ADAM8	NM_001109	Targetscan
hsa-miR-135a-3p	101	ADAM8	NM_001164489	Targetscan
hsa-miR-135a-3p	101	ADAM8	NM_001164490	Targetscan
hsa-miR-29c-5p	101	ADAM8	NM_001109	Miranda
hsa-miR-29c-5p	101	ADAM8	BC064500	Miranda
hsa-miR-29c-5p	101	ADAM8	AK301147	Miranda
hsa-miR-32-5p	101	ADAM8	NM_001164489	Targetscan
hsa-miR-32-5p	101	ADAM8	NM_001164490	Targetscan
hsa-miR-32-5p	101	ADAM8	NM_001109	Targetscan
hsa-miR-132-3p	102	ADAM10	NM_001110	Miranda
hsa-miR-215	102	ADAM10	NM_001110	Miranda
hsa-miR-29c-5p	102	ADAM10	NM_001110	Miranda
hsa-miR-32-5p	102	ADAM10	NM_001110	Miranda
hsa-miR-32-5p	102	ADAM10	NM_001110	Eimmo
hsa-miR-32-5p	102	ADAM10	NM_001110	Targetscan
hsa-miR-32-5p	102	ADAM10	NM_001110	PITA
hsa-miR-34a-5p	102	ADAM10	NM_001110	Miranda
hsa-miR-34a-5p	102	ADAM10	NM_001110	Eimmo
hsa-miR-34a-5p	102	ADAM10	NM_001110	Targetscan
hsa-miR-10a-5p	103	ADAR	NM_001111	Targetscan
hsa-miR-10a-5p	103	ADAR	NM_001025107	Targetscan
hsa-miR-10a-5p	103	ADAR	NM_001193495	Targetscan
hsa-miR-10a-5p	103	ADAR	NM_015840	Targetscan
hsa-miR-10a-5p	103	ADAR	NM_015841	Targetscan
hsa-miR-132-3p	103	ADAR	NM_001025107	Targetscan
hsa-miR-132-3p	103	ADAR	NM_015840	Targetscan
hsa-miR-132-3p	103	ADAR	NM_015841	Targetscan
hsa-miR-132-3p	103	ADAR	NM_001111	Targetscan
hsa-miR-132-3p	103	ADAR	NM_001193495	Targetscan
hsa-miR-135a-3p	103	ADAR	NM_001111	Miranda
hsa-miR-135a-3p	103	ADAR	NM_001111	Targetscan
hsa-miR-135a-3p	103	ADAR	NM_001025107	Targetscan
hsa-miR-135a-3p	103	ADAR	NM_001193495	Targetscan
hsa-miR-135a-3p	103	ADAR	NM_015840	Targetscan
hsa-miR-135a-3p	103	ADAR	NM_015841	Targetscan
hsa-miR-32-5p	103	ADAR	NM_015840	Targetscan
hsa-miR-32-5p	103	ADAR	NM_015841	Targetscan
hsa-miR-32-5p	103	ADAR	NM_001111	Targetscan
hsa-miR-32-5p	103	ADAR	NM_001025107	Targetscan
hsa-miR-32-5p	103	ADAR	NM_001193495	Targetscan
hsa-miR-33a-5p	103	ADAR	NM_015841	Targetscan
hsa-miR-33a-5p	103	ADAR	NM_015840	Targetscan
hsa-miR-33a-5p	103	ADAR	NM_001111	Targetscan
hsa-miR-33a-5p	103	ADAR	NM_001025107	Targetscan
hsa-miR-33a-5p	103	ADAR	NM_001193495	Targetscan
hsa-miR-505-3p	103	ADAR	NM_015841	Targetscan
hsa-miR-505-3p	103	ADAR	NM_015840	Targetscan
hsa-miR-505-3p	103	ADAR	NM_001193495	Targetscan
hsa-miR-505-3p	103	ADAR	NM_001111	Targetscan
hsa-miR-505-3p	103	ADAR	NM_001025107	Targetscan
hsa-miR-505-5p	103	ADAR	NM_015841	Targetscan
hsa-miR-505-5p	103	ADAR	NM_015840	Targetscan
hsa-miR-505-5p	103	ADAR	NM_001193495	Targetscan
hsa-miR-505-5p	103	ADAR	NM_001111	Targetscan
hsa-miR-505-5p	103	ADAR	NM_001025107	Targetscan
hsa-miR-152	104	ADARB1	BC030663	Miranda
hsa-miR-181d	104	ADARB1	NR_027672	Miranda
hsa-miR-181d	104	ADARB1	NM_001160230	Miranda
hsa-miR-181d	104	ADARB1	NR_027674	Miranda
hsa-miR-181d	104	ADARB1	NM_015833	Miranda
hsa-miR-181d	104	ADARB1	AB194372	Miranda
hsa-miR-181d	104	ADARB1	U76421	Miranda
hsa-miR-181d	104	ADARB1	NR_027673	Miranda
hsa-miR-181d	104	ADARB1	NM_001112	Eimmo
hsa-miR-181d	104	ADARB1	NM_015834	Eimmo
hsa-miR-181d	104	ADARB1	NM_015833	Eimmo
hsa-miR-181d	104	ADARB1	NM_001160230	Eimmo
hsa-miR-210	104	ADARB1	NM_015833	Targetscan
hsa-miR-210	104	ADARB1	NM_001112	Targetscan
hsa-miR-210	104	ADARB1	NM_001160230	Targetscan
hsa-miR-210	104	ADARB1	NM_015834	Targetscan
hsa-miR-32-5p	104	ADARB1	NM_001160230	Targetscan
hsa-miR-32-5p	104	ADARB1	NM_001112	Targetscan
hsa-miR-32-5p	104	ADARB1	NM_015833	Targetscan
hsa-miR-32-5p	104	ADARB1	NM_015834	Targetscan
hsa-miR-33a-5p	104	ADARB1	NM_015834	Targetscan
hsa-miR-33a-5p	104	ADARB1	NM_015833	Targetscan
hsa-miR-33a-5p	104	ADARB1	NM_001160230	Targetscan
hsa-miR-33a-5p	104	ADARB1	NM_001112	Targetscan
hsa-miR-362-3p	104	ADARB1	BC030663	Miranda
hsa-miR-873-5p	104	ADARB1	BC030663	Miranda
hsa-miR-876-3p	104	ADARB1	NM_001112	Targetscan
hsa-miR-876-3p	104	ADARB1	NM_015833	Targetscan
hsa-miR-876-5p	104	ADARB1	NM_001112	Targetscan
hsa-miR-876-5p	104	ADARB1	NM_015833	Targetscan
hsa-miR-135a-3p	105	ADARB2	NM_018702	Miranda
hsa-miR-135a-3p	105	ADARB2	NM_018702	Eimmo
hsa-miR-135a-3p	105	ADARB2	NM_018702	Targetscan
hsa-miR-152	105	ADARB2	NM_018702	Miranda
hsa-miR-32-5p	105	ADARB2	NM_018702	Miranda
hsa-miR-32-5p	105	ADARB2	NM_018702	Targetscan
hsa-miR-33a-5p	105	ADARB2	NM_018702	Targetscan
hsa-miR-7-5p	105	ADARB2	NM_018702	Targetscan
hsa-miR-873-5p	105	ADARB2	NM_018702	Targetscan
hsa-miR-876-3p	105	ADARB2	NM_018702	Targetscan
hsa-miR-876-5p	105	ADARB2	NM_018702	Targetscan
hsa-miR-10a-5p	107	ADCY1	NM_021116	Targetscan
hsa-miR-132-3p	107	ADCY1	NM_021116	Targetscan
hsa-miR-135a-3p	107	ADCY1	NM_021116	Eimmo
hsa-miR-135a-3p	107	ADCY1	NM_021116	Targetscan
hsa-miR-181d	107	ADCY1	NM_021116	Eimmo
hsa-miR-181d	107	ADCY1	NM_021116	PITA
hsa-miR-210	107	ADCY1	NM_021116	Targetscan
hsa-miR-32-5p	107	ADCY1	NM_021116	Targetscan
hsa-miR-33a-5p	107	ADCY1	NM_021116	Targetscan
hsa-miR-34a-5p	107	ADCY1	NM_021116	Targetscan
hsa-miR-362-3p	107	ADCY1	BC041473	Miranda
hsa-miR-505-3p	107	ADCY1	NM_021116	Targetscan
hsa-miR-505-5p	107	ADCY1	NM_021116	Targetscan
hsa-miR-7-5p	107	ADCY1	NM_021116	Targetscan
hsa-miR-873-5p	107	ADCY1	NM_021116	Eimmo
hsa-miR-873-5p	107	ADCY1	NM_021116	Targetscan
hsa-miR-876-3p	107	ADCY1	NM_021116	Targetscan
hsa-miR-876-5p	107	ADCY1	NM_021116	Targetscan
hsa-miR-1299	108	ADCY2	NM_020546	Eimmo
hsa-miR-135a-3p	108	ADCY2	NM_020546	Miranda
hsa-miR-135a-3p	108	ADCY2	NM_020546	Targetscan
hsa-miR-152	108	ADCY2	NM_020546	Miranda
hsa-miR-152	108	ADCY2	NM_020546	Eimmo
hsa-miR-152	108	ADCY2	NM_020546	PITA
hsa-miR-181d	108	ADCY2	NM_020546	Miranda
hsa-miR-181d	108	ADCY2	NM_020546	Eimmo
hsa-miR-200c-3p	108	ADCY2	NM_020546	Miranda
hsa-miR-200c-3p	108	ADCY2	NM_020546	Eimmo
hsa-miR-200c-3p	108	ADCY2	NM_020546	PITA
hsa-miR-29c-5p	108	ADCY2	NM_020546	Miranda
hsa-miR-32-5p	108	ADCY2	NM_020546	Targetscan
hsa-miR-33a-5p	108	ADCY2	NM_020546	Targetscan
hsa-miR-505-3p	108	ADCY2	NM_020546	Miranda
hsa-miR-505-5p	108	ADCY2	NM_020546	Miranda
hsa-miR-873-5p	108	ADCY2	NM_020546	Targetscan
hsa-miR-876-3p	108	ADCY2	NM_020546	Targetscan
hsa-miR-876-5p	108	ADCY2	NM_020546	Targetscan
hsa-miR-132-3p	109	ADCY3	NM_004036	Miranda
hsa-miR-132-3p	109	ADCY3	NM_004036	Eimmo
hsa-miR-132-3p	109	ADCY3	NM_004036	Pictar
hsa-miR-132-3p	109	ADCY3	NM_004036	Targetscan
hsa-miR-132-3p	109	ADCY3	NM_004036	PITA
hsa-miR-32-5p	109	ADCY3	NM_004036	Miranda
hsa-miR-32-5p	109	ADCY3	NM_004036	Eimmo
hsa-miR-32-5p	109	ADCY3	NM_004036	mirDB
hsa-miR-32-5p	109	ADCY3	NM_004036	Targetscan
hsa-miR-32-5p	109	ADCY3	NM_004036	PITA
hsa-miR-3652	109	ADCY3	NM_004036	Pictar
hsa-miR-873-5p	109	ADCY3	NM_004036	Miranda
hsa-miR-873-5p	109	ADCY3	NM_004036	Pictar
hsa-miR-873-5p	109	ADCY3	NM_004036	Targetscan
hsa-miR-1271-5p	111	ADCY5	NM_001199642	Eimmo
hsa-miR-1271-5p	111	ADCY5	NM_183357	Eimmo
hsa-miR-135a-3p	111	ADCY5	NM_183357	Targetscan
hsa-miR-135a-3p	111	ADCY5	NM_001199642	Targetscan
hsa-miR-210	111	ADCY5	NM_001199642	Targetscan
hsa-miR-210	111	ADCY5	NM_183357	Targetscan
hsa-miR-32-5p	111	ADCY5	NM_001199642	Pictar
hsa-miR-32-5p	111	ADCY5	NM_183357	Pictar
hsa-miR-32-5p	111	ADCY5	NM_001199642	Targetscan
hsa-miR-32-5p	111	ADCY5	NM_183357	Targetscan
hsa-miR-34a-5p	111	ADCY5	NM_183357	Targetscan
hsa-miR-34a-5p	111	ADCY5	NM_001199642	Targetscan
hsa-miR-373-5p	111	ADCY5	NM_183357	Miranda
hsa-miR-7-5p	111	ADCY5	NM_183357	Targetscan
hsa-miR-7-5p	111	ADCY5	NM_001199642	Targetscan
hsa-miR-1271-5p	112	ADCY6	NM_015270	Miranda
hsa-miR-1271-5p	112	ADCY6	NM_015270	Eimmo
hsa-miR-1271-5p	112	ADCY6	NM_020983	Eimmo
hsa-miR-1271-5p	112	ADCY6	NM_015270	mirDB
hsa-miR-1271-5p	112	ADCY6	NM_020983	mirDB
hsa-miR-1271-5p	112	ADCY6	NM_015270;NM_020983	PITA
hsa-miR-1299	112	ADCY6	NM_015270	Eimmo
hsa-miR-1299	112	ADCY6	NM_020983	Eimmo
hsa-miR-135a-3p	112	ADCY6	AK294446	Miranda
hsa-miR-135a-3p	112	ADCY6	NM_015270	Eimmo
hsa-miR-135a-3p	112	ADCY6	NM_020983	Eimmo
hsa-miR-135a-3p	112	ADCY6	NM_015270	Targetscan
hsa-miR-135a-3p	112	ADCY6	NM_020983	Targetscan
hsa-miR-181d	112	ADCY6	NM_015270	Eimmo
hsa-miR-181d	112	ADCY6	NM_020983	Eimmo
hsa-miR-32-5p	112	ADCY6	NM_020983	Targetscan
hsa-miR-32-5p	112	ADCY6	NM_015270	Targetscan
hsa-miR-33a-5p	112	ADCY6	NM_020983	Targetscan
hsa-miR-33a-5p	112	ADCY6	NM_015270	Targetscan
hsa-miR-34a-5p	112	ADCY6	NM_015270	Miranda
hsa-miR-34a-5p	112	ADCY6	AK294446	Miranda
hsa-miR-3652	112	ADCY6	NM_015270	Pictar
hsa-miR-3652	112	ADCY6	NM_020983	Pictar
hsa-miR-373-5p	112	ADCY6	NM_015270	Miranda
hsa-miR-373-5p	112	ADCY6	AK294446	Miranda
hsa-miR-373-5p	112	ADCY6	NM_015270	Eimmo
hsa-miR-373-5p	112	ADCY6	NM_020983	Eimmo
hsa-miR-7-5p	112	ADCY6	NM_015270	Targetscan
hsa-miR-7-5p	112	ADCY6	NM_020983	Targetscan
hsa-miR-873-5p	112	ADCY6	NM_015270	Miranda
hsa-miR-873-5p	112	ADCY6	NM_015270	Targetscan
hsa-miR-873-5p	112	ADCY6	NM_020983	Targetscan
hsa-miR-10a-5p	113	ADCY7	NM_001114	Miranda
hsa-miR-10a-5p	113	ADCY7	NM_001114	Targetscan
hsa-miR-132-3p	113	ADCY7	NM_001114	Targetscan
hsa-miR-135a-3p	113	ADCY7	NM_001114	Targetscan
hsa-miR-200c-3p	113	ADCY7	NM_001114	Miranda
hsa-miR-210	113	ADCY7	NM_001114	Targetscan
hsa-miR-215	113	ADCY7	NM_001114	Miranda
hsa-miR-33a-5p	113	ADCY7	NM_001114	Targetscan
hsa-miR-7-5p	113	ADCY7	NM_001114	Targetscan
hsa-miR-132-3p	115	ADCY9	NM_001116	Miranda
hsa-miR-132-3p	115	ADCY9	NM_001116	Targetscan
hsa-miR-181d	115	ADCY9	NM_001116	Miranda
hsa-miR-181d	115	ADCY9	NM_001116	Eimmo
hsa-miR-181d	115	ADCY9	NM_001116	PITA
hsa-miR-200c-3p	115	ADCY9	NM_001116	Miranda
hsa-miR-32-5p	115	ADCY9	NM_001116	Targetscan
hsa-miR-33a-5p	115	ADCY9	NM_001116	Miranda
hsa-miR-33a-5p	115	ADCY9	NM_001116	Targetscan
hsa-miR-373-5p	115	ADCY9	NM_001116	mirDB
hsa-miR-7-5p	115	ADCY9	NM_001116	Miranda
hsa-miR-7-5p	115	ADCY9	NM_001116	Pictar
hsa-miR-7-5p	115	ADCY9	NM_001116	Targetscan
hsa-miR-7-5p	115	ADCY9	NM_001116	PITA
hsa-miR-1271-5p	116	ADCYAP1	NM_001117	Eimmo
hsa-miR-1271-5p	116	ADCYAP1	NM_001099733	Eimmo
hsa-miR-132-3p	116	ADCYAP1	NM_001117	Miranda
hsa-miR-132-3p	116	ADCYAP1	NM_001117	Eimmo
hsa-miR-132-3p	116	ADCYAP1	NM_001099733	Eimmo
hsa-miR-132-3p	116	ADCYAP1	NM_001117	Targetscan
hsa-miR-132-3p	116	ADCYAP1	NM_001099733	Targetscan
hsa-miR-135a-3p	116	ADCYAP1	NM_001117	Miranda
hsa-miR-135a-3p	116	ADCYAP1	NM_001117	Eimmo
hsa-miR-135a-3p	116	ADCYAP1	NM_001099733	Eimmo
hsa-miR-135a-3p	116	ADCYAP1	NM_001117	Targetscan
hsa-miR-135a-3p	116	ADCYAP1	NM_001099733	Targetscan
hsa-miR-135a-3p	116	ADCYAP1	NM_001099733;NM_001117	PITA
hsa-miR-152	116	ADCYAP1	NM_001117	Miranda
hsa-miR-200c-3p	116	ADCYAP1	NM_001117	Eimmo
hsa-miR-200c-3p	116	ADCYAP1	NM_001099733	Eimmo
hsa-miR-32-5p	116	ADCYAP1	NM_001099733	Targetscan
hsa-miR-32-5p	116	ADCYAP1	NM_001117	Targetscan
hsa-miR-33a-5p	116	ADCYAP1	NM_001117	Miranda
hsa-miR-33a-5p	116	ADCYAP1	NM_001117	Eimmo
hsa-miR-33a-5p	116	ADCYAP1	NM_001099733	Eimmo
hsa-miR-33a-5p	116	ADCYAP1	NM_001099733	Targetscan
hsa-miR-33a-5p	116	ADCYAP1	NM_001117	Targetscan
hsa-miR-33a-5p	116	ADCYAP1	NM_001099733;NM_001117	PITA
hsa-miR-362-3p	116	ADCYAP1	NM_001117	Miranda
hsa-miR-362-3p	116	ADCYAP1	NM_001117	Pictar
hsa-miR-362-3p	116	ADCYAP1	NM_001099733	Pictar
hsa-miR-3652	116	ADCYAP1	NM_001117	Pictar
hsa-miR-3652	116	ADCYAP1	NM_001099733	Pictar
hsa-miR-873-5p	116	ADCYAP1	NM_001117	Targetscan
hsa-miR-873-5p	116	ADCYAP1	NM_001099733	Targetscan
hsa-miR-876-3p	116	ADCYAP1	NM_001099733	Targetscan
hsa-miR-876-3p	116	ADCYAP1	NM_001117	Targetscan
hsa-miR-876-5p	116	ADCYAP1	NM_001099733	Targetscan
hsa-miR-876-5p	116	ADCYAP1	NM_001117	Targetscan
hsa-miR-10a-5p	117	ADCYAP1R1	NM_001199637	Targetscan
hsa-miR-10a-5p	117	ADCYAP1R1	NM_001199635	Targetscan
hsa-miR-10a-5p	117	ADCYAP1R1	NM_001199636	Targetscan
hsa-miR-10a-5p	117	ADCYAP1R1	NM_001118	Targetscan
hsa-miR-1227-5p	117	ADCYAP1R1	NM_001199637	Pictar
hsa-miR-1227-5p	117	ADCYAP1R1	NM_001199635	Pictar
hsa-miR-1227-5p	117	ADCYAP1R1	NM_001118	Pictar
hsa-miR-1227-5p	117	ADCYAP1R1	NM_001199636	Pictar
hsa-miR-135a-3p	117	ADCYAP1R1	NM_001199635	Eimmo
hsa-miR-135a-3p	117	ADCYAP1R1	NM_001199637	Eimmo
hsa-miR-135a-3p	117	ADCYAP1R1	NM_001199636	Eimmo
hsa-miR-135a-3p	117	ADCYAP1R1	NM_001118	Eimmo
hsa-miR-135a-3p	117	ADCYAP1R1	NM_001199635	Targetscan
hsa-miR-135a-3p	117	ADCYAP1R1	NM_001199637	Targetscan
hsa-miR-135a-3p	117	ADCYAP1R1	NM_001199636	Targetscan
hsa-miR-135a-3p	117	ADCYAP1R1	NM_001118	Targetscan
hsa-miR-29c-5p	117	ADCYAP1R1	NM_001199635	Eimmo
hsa-miR-29c-5p	117	ADCYAP1R1	NM_001199637	Eimmo
hsa-miR-29c-5p	117	ADCYAP1R1	NM_001199636	Eimmo
hsa-miR-29c-5p	117	ADCYAP1R1	NM_001118	Eimmo
hsa-miR-32-5p	117	ADCYAP1R1	NM_001118	Targetscan
hsa-miR-32-5p	117	ADCYAP1R1	NM_001199637	Targetscan
hsa-miR-32-5p	117	ADCYAP1R1	NM_001199635	Targetscan
hsa-miR-32-5p	117	ADCYAP1R1	NM_001199636	Targetscan
hsa-miR-33a-5p	117	ADCYAP1R1	NM_001199635	Targetscan
hsa-miR-33a-5p	117	ADCYAP1R1	NM_001199636	Targetscan
hsa-miR-33a-5p	117	ADCYAP1R1	NM_001199637	Targetscan
hsa-miR-33a-5p	117	ADCYAP1R1	NM_001118	Targetscan
hsa-miR-7-5p	117	ADCYAP1R1	NM_001199636	Targetscan
hsa-miR-7-5p	117	ADCYAP1R1	NM_001199637	Targetscan
hsa-miR-7-5p	117	ADCYAP1R1	NM_001118	Targetscan
hsa-miR-7-5p	117	ADCYAP1R1	NM_001199635	Targetscan
hsa-miR-873-5p	117	ADCYAP1R1	NM_001118	Targetscan
hsa-miR-873-5p	117	ADCYAP1R1	NM_001199637	Targetscan
hsa-miR-873-5p	117	ADCYAP1R1	NM_001199635	Targetscan
hsa-miR-873-5p	117	ADCYAP1R1	NM_001199636	Targetscan
hsa-miR-876-3p	117	ADCYAP1R1	NM_001199637	Pictar
hsa-miR-876-3p	117	ADCYAP1R1	NM_001199635	Pictar
hsa-miR-876-3p	117	ADCYAP1R1	NM_001118	Pictar
hsa-miR-876-3p	117	ADCYAP1R1	NM_001199636	Pictar
hsa-miR-876-3p	117	ADCYAP1R1	NM_001118	Targetscan
hsa-miR-876-3p	117	ADCYAP1R1	NM_001199635	Targetscan
hsa-miR-876-3p	117	ADCYAP1R1	NM_001199636	Targetscan
hsa-miR-876-3p	117	ADCYAP1R1	NM_001199637	Targetscan
hsa-miR-876-5p	117	ADCYAP1R1	NM_001118	Targetscan
hsa-miR-876-5p	117	ADCYAP1R1	NM_001199635	Targetscan
hsa-miR-876-5p	117	ADCYAP1R1	NM_001199636	Targetscan
hsa-miR-876-5p	117	ADCYAP1R1	NM_001199637	Targetscan
hsa-miR-132-3p	118	ADD1	AK295457	Miranda
hsa-miR-132-3p	118	ADD1	NM_001119	Targetscan
hsa-miR-132-3p	118	ADD1	NM_176801	Targetscan
hsa-miR-132-3p	118	ADD1	NM_014190	Targetscan
hsa-miR-132-3p	118	ADD1	NM_014189	Targetscan
hsa-miR-135a-3p	118	ADD1	BC042998	Miranda
hsa-miR-181d	118	ADD1	AK295457	Miranda
hsa-miR-210	118	ADD1	NM_014189	Miranda
hsa-miR-210	118	ADD1	BC042998	Miranda
hsa-miR-32-5p	118	ADD1	NM_176801	Targetscan
hsa-miR-32-5p	118	ADD1	NM_014190	Targetscan
hsa-miR-32-5p	118	ADD1	NM_014189	Targetscan
hsa-miR-32-5p	118	ADD1	NM_001119	Targetscan
hsa-miR-33a-5p	118	ADD1	NM_001119	Targetscan
hsa-miR-33a-5p	118	ADD1	NM_014189	Targetscan
hsa-miR-33a-5p	118	ADD1	NM_014190	Targetscan
hsa-miR-33a-5p	118	ADD1	NM_176801	Targetscan
hsa-miR-362-3p	118	ADD1	CR936693	Miranda
hsa-miR-373-5p	118	ADD1	NM_014189	Miranda
hsa-miR-373-5p	118	ADD1	BC042998	Miranda
hsa-miR-7-5p	118	ADD1	NM_001119	Targetscan
hsa-miR-7-5p	118	ADD1	NM_176801	Targetscan
hsa-miR-7-5p	118	ADD1	NM_014189	Targetscan
hsa-miR-7-5p	118	ADD1	NM_014190	Targetscan
hsa-miR-10a-5p	119	ADD2	NM_017482	Targetscan
hsa-miR-10a-5p	119	ADD2	NM_001185055	Targetscan
hsa-miR-132-3p	119	ADD2	NM_001185055	Targetscan
hsa-miR-132-3p	119	ADD2	NM_017482	Targetscan
hsa-miR-135a-3p	119	ADD2	NM_001617	Miranda
hsa-miR-135a-3p	119	ADD2	NM_017488	Miranda
hsa-miR-135a-3p	119	ADD2	NM_001185054	Targetscan
hsa-miR-135a-3p	119	ADD2	NM_001617	Targetscan
hsa-miR-135a-3p	119	ADD2	NM_017488	Targetscan
hsa-miR-152	119	ADD2	NM_001617	Miranda
hsa-miR-152	119	ADD2	NM_017488	Miranda
hsa-miR-32-5p	119	ADD2	NM_017482	Miranda
hsa-miR-32-5p	119	ADD2	NM_017482	Eimmo
hsa-miR-32-5p	119	ADD2	NM_001185055	Eimmo
hsa-miR-32-5p	119	ADD2	NM_017482	Targetscan
hsa-miR-32-5p	119	ADD2	NM_001185055	Targetscan
hsa-miR-33a-5p	119	ADD2	NM_001617	Miranda
hsa-miR-33a-5p	119	ADD2	NM_001617	Targetscan
hsa-miR-33a-5p	119	ADD2	NM_001185054	Targetscan
hsa-miR-33a-5p	119	ADD2	NM_017488	Targetscan
hsa-miR-34a-5p	119	ADD2	NM_001617	Miranda
hsa-miR-34a-5p	119	ADD2	NM_017488	Miranda
hsa-miR-34a-5p	119	ADD2	NM_001617	Eimmo
hsa-miR-34a-5p	119	ADD2	NM_001185054	Eimmo
hsa-miR-34a-5p	119	ADD2	NM_017488	Eimmo
hsa-miR-34a-5p	119	ADD2	NM_017488	Targetscan
hsa-miR-34a-5p	119	ADD2	NM_001617	Targetscan
hsa-miR-34a-5p	119	ADD2	NM_001185054	Targetscan
hsa-miR-362-3p	119	ADD2	NM_017482	Miranda
hsa-miR-362-3p	119	ADD2	NM_017482;NM_017484	PITA
hsa-miR-505-5p	119	ADD2	NM_001185054	Pictar
hsa-miR-505-5p	119	ADD2	NM_017488	Pictar
hsa-miR-505-5p	119	ADD2	NM_001617	Pictar
hsa-miR-7-5p	119	ADD2	NM_017482	Miranda
hsa-miR-7-5p	119	ADD2	NM_017482	Targetscan
hsa-miR-7-5p	119	ADD2	NM_001185055	Targetscan
hsa-miR-7-5p	119	ADD2	NM_017482;NM_017484	PITA
hsa-miR-873-5p	119	ADD2	NM_017488	Miranda
hsa-miR-873-5p	119	ADD2	CR590670	Miranda
hsa-miR-873-5p	119	ADD2	NM_001185054	Pictar
hsa-miR-873-5p	119	ADD2	NM_017488	Pictar
hsa-miR-873-5p	119	ADD2	NM_001617	Pictar
hsa-miR-873-5p	119	ADD2	NM_001185055	Targetscan
hsa-miR-873-5p	119	ADD2	NM_017482	Targetscan
hsa-miR-876-3p	119	ADD2	NM_001617	Targetscan
hsa-miR-876-3p	119	ADD2	NM_001185054	Targetscan
hsa-miR-876-3p	119	ADD2	NM_017488	Targetscan
hsa-miR-876-5p	119	ADD2	NM_001617	Miranda
hsa-miR-876-5p	119	ADD2	NM_017488	Miranda
hsa-miR-876-5p	119	ADD2	CR590670	Miranda
hsa-miR-876-5p	119	ADD2	NM_017488	Eimmo
hsa-miR-876-5p	119	ADD2	NM_001617	Targetscan
hsa-miR-876-5p	119	ADD2	NM_001185054	Targetscan
hsa-miR-876-5p	119	ADD2	NM_017488	Targetscan
hsa-miR-1271-5p	120	ADD3	NM_016824	Miranda
hsa-miR-1299	120	ADD3	NM_016824	Eimmo
hsa-miR-1299	120	ADD3	NM_001121	Eimmo
hsa-miR-1299	120	ADD3	NM_019903	Eimmo
hsa-miR-181d	120	ADD3	NM_016824	Miranda
hsa-miR-200c-3p	120	ADD3	NM_016824	Miranda
hsa-miR-200c-3p	120	ADD3	NM_016824	Eimmo
hsa-miR-200c-3p	120	ADD3	NM_001121	Eimmo
hsa-miR-200c-3p	120	ADD3	NM_019903	Eimmo
hsa-miR-200c-3p	120	ADD3	NM_001121;NM_016824;NM_019903	PITA
hsa-miR-32-5p	120	ADD3	NM_016824	Miranda
hsa-miR-33a-5p	120	ADD3	NM_001121	Targetscan
hsa-miR-33a-5p	120	ADD3	NM_016824	Targetscan
hsa-miR-33a-5p	120	ADD3	NM_019903	Targetscan
hsa-miR-505-3p	120	ADD3	NM_016824	Miranda
hsa-miR-505-5p	120	ADD3	NM_016824	Miranda
hsa-miR-7-5p	120	ADD3	NM_019903	Targetscan
hsa-miR-7-5p	120	ADD3	NM_016824	Targetscan
hsa-miR-7-5p	120	ADD3	NM_001121	Targetscan
hsa-miR-152	123	PLIN2	NM_001122	Miranda
hsa-miR-32-5p	123	PLIN2	NM_001122	Targetscan
hsa-miR-33a-5p	123	PLIN2	NM_001122	Targetscan
hsa-miR-373-5p	123	PLIN2	NM_001122	Miranda
hsa-miR-505-3p	123	PLIN2	NM_001122	Miranda
hsa-miR-505-5p	123	PLIN2	NM_001122	Miranda
hsa-miR-181d	124	ADH1A	AK309597	Miranda
hsa-miR-876-3p	124	ADH1A	NM_000667	Targetscan
hsa-miR-876-5p	124	ADH1A	BT019812	Miranda
hsa-miR-876-5p	124	ADH1A	NM_000667	Targetscan
hsa-miR-200c-3p	125	ADH1B	NM_000668	Miranda
hsa-miR-32-5p	125	ADH1B	NM_000668	Miranda
hsa-miR-32-5p	125	ADH1B	NM_000668	Targetscan
hsa-miR-876-3p	126	ADH1C	NM_000669	Targetscan
hsa-miR-876-5p	126	ADH1C	NM_000669	Miranda
hsa-miR-876-5p	126	ADH1C	NM_000669	Targetscan
hsa-miR-135a-3p	127	ADH4	NM_000670	Miranda
hsa-miR-135a-3p	127	ADH4	NM_000670	Targetscan
hsa-miR-181d	127	ADH4	NM_000670	Miranda
hsa-miR-29c-5p	127	ADH4	NM_000670	Miranda
hsa-miR-32-5p	127	ADH4	NM_000670	Targetscan
hsa-miR-505-3p	127	ADH4	NM_000670	Miranda
hsa-miR-505-5p	127	ADH4	NM_000670	Miranda
hsa-miR-132-3p	128	ADH5	NM_000671	Miranda
hsa-miR-32-5p	128	ADH5	NM_000671	Targetscan
hsa-miR-876-5p	128	ADH5	NM_000671	Miranda
hsa-miR-33a-5p	130	ADH6	NM_001102470	Miranda
hsa-miR-33a-5p	130	ADH6	NM_001102470	Targetscan
hsa-miR-873-5p	130	ADH6	NM_001102470	Miranda
hsa-miR-873-5p	130	ADH6	NM_001102470	Targetscan
hsa-miR-876-3p	130	ADH6	NM_001102470	Targetscan
hsa-miR-876-5p	130	ADH6	NM_001102470	Targetscan
hsa-miR-7-5p	131	ADH7	NM_000673	Targetscan
hsa-miR-7-5p	131	ADH7	NM_001166504	Targetscan
hsa-miR-1271-5p	132	ADK	NM_006721	Miranda
hsa-miR-1271-5p	132	ADK	NM_001123	mirDB
hsa-miR-1271-5p	132	ADK	NM_001202449	mirDB
hsa-miR-1271-5p	132	ADK	NM_001202450	mirDB
hsa-miR-1271-5p	132	ADK	NM_006721	mirDB
hsa-miR-1271-5p	132	ADK	NM_001123;NM_006721	PITA
hsa-miR-152	132	ADK	NM_006721	Miranda
hsa-miR-181d	132	ADK	NM_006721	Miranda
hsa-miR-32-5p	132	ADK	NM_006721	Miranda
hsa-miR-32-5p	132	ADK	NM_006721	Targetscan
hsa-miR-32-5p	132	ADK	NM_001123	Targetscan
hsa-miR-32-5p	132	ADK	NM_001202449	Targetscan
hsa-miR-32-5p	132	ADK	NM_001202450	Targetscan
hsa-miR-34a-5p	132	ADK	NM_006721	Miranda
hsa-miR-34a-5p	132	ADK	NM_006721	Targetscan
hsa-miR-34a-5p	132	ADK	NM_001123	Targetscan
hsa-miR-34a-5p	132	ADK	NM_001202449	Targetscan
hsa-miR-34a-5p	132	ADK	NM_001202450	Targetscan
hsa-miR-362-3p	132	ADK	NM_006721	Miranda
hsa-miR-873-5p	132	ADK	NM_001202449	Pictar
hsa-miR-873-5p	132	ADK	NM_001123	Pictar
hsa-miR-873-5p	132	ADK	NM_001202450	Pictar
hsa-miR-873-5p	132	ADK	NM_006721	Pictar
hsa-miR-873-5p	132	ADK	NM_001202450	Targetscan
hsa-miR-873-5p	132	ADK	NM_001202449	Targetscan
hsa-miR-873-5p	132	ADK	NM_001123	Targetscan
hsa-miR-873-5p	132	ADK	NM_006721	Targetscan
hsa-miR-181d	133	ADM	NM_001124	Miranda
hsa-miR-181d	133	ADM	NM_001124	Eimmo
hsa-miR-181d	133	ADM	NM_001124	PITA
hsa-miR-32-5p	133	ADM	NM_001124	Miranda
hsa-miR-32-5p	133	ADM	NM_001124	Eimmo
hsa-miR-32-5p	133	ADM	NM_001124	PITA
hsa-miR-33a-5p	133	ADM	NM_001124	Targetscan
hsa-miR-505-3p	133	ADM	NM_001124	Miranda
hsa-miR-505-5p	133	ADM	NM_001124	Miranda
hsa-miR-32-5p	134	ADORA1	NM_000674	Targetscan
hsa-miR-32-5p	134	ADORA1	NM_001048230	Targetscan
hsa-miR-505-3p	134	ADORA1	NM_000674	Targetscan
hsa-miR-505-3p	134	ADORA1	NM_001048230	Targetscan
hsa-miR-505-5p	134	ADORA1	NM_000674	Targetscan
hsa-miR-505-5p	134	ADORA1	NM_001048230	Targetscan
hsa-miR-181d	135	ADORA2A	NM_000675	Eimmo
hsa-miR-32-5p	135	ADORA2A	NM_000675	Targetscan
hsa-miR-34a-5p	135	ADORA2A	NM_000675	Miranda
hsa-miR-132-3p	136	ADORA2B	NM_000676	Miranda
hsa-miR-33a-5p	136	ADORA2B	NM_000676	Miranda
hsa-miR-33a-5p	136	ADORA2B	NM_000676	Targetscan
hsa-miR-373-5p	136	ADORA2B	NM_000676	Miranda
hsa-miR-373-5p	136	ADORA2B	NM_000676	Eimmo
hsa-miR-505-3p	136	ADORA2B	NM_000676	Miranda
hsa-miR-505-5p	136	ADORA2B	NM_000676	Miranda
hsa-miR-7-5p	136	ADORA2B	NM_000676	Targetscan
hsa-miR-876-3p	136	ADORA2B	NM_000676	Targetscan
hsa-miR-876-5p	136	ADORA2B	NM_000676	Targetscan
hsa-miR-32-5p	140	ADORA3	NM_000677	Targetscan
hsa-miR-152	141	ADPRH	NM_001125	Miranda
hsa-miR-215	141	ADPRH	NM_001125	Miranda
hsa-miR-29c-5p	141	ADPRH	NM_001125	Miranda
hsa-miR-32-5p	141	ADPRH	NM_001125	Targetscan
hsa-miR-33a-5p	141	ADPRH	NM_001125	Targetscan
hsa-miR-34a-5p	141	ADPRH	NM_001125	Miranda
hsa-miR-34a-5p	141	ADPRH	NM_001125	Targetscan
hsa-miR-373-5p	141	ADPRH	NM_001125	mirDB
hsa-miR-7-5p	141	ADPRH	NM_001125	Targetscan
hsa-miR-873-5p	141	ADPRH	NM_001125	Targetscan
hsa-miR-876-3p	141	ADPRH	NM_001125	Targetscan
hsa-miR-876-5p	141	ADPRH	NM_001125	Miranda
hsa-miR-876-5p	141	ADPRH	NM_001125	Targetscan
hsa-miR-152	142	PARP1	NM_001618	Miranda
hsa-miR-200c-3p	142	PARP1	NM_001618	Miranda
hsa-miR-33a-5p	142	PARP1	NM_001618	Miranda
hsa-miR-373-5p	142	PARP1	NM_001618	Miranda
hsa-miR-7-5p	142	PARP1	NM_001618	Miranda
hsa-miR-7-5p	142	PARP1	NM_001618	mirDB
hsa-miR-7-5p	142	PARP1	NM_001618	Pictar
hsa-miR-7-5p	142	PARP1	NM_001618	Targetscan
hsa-miR-7-5p	142	PARP1	NM_001618	PITA
hsa-miR-32-5p	146	ADRA1D	NM_000678	Targetscan
hsa-miR-34a-5p	146	ADRA1D	NM_000678	Miranda
hsa-miR-34a-5p	146	ADRA1D	NM_000678	Targetscan
hsa-miR-1271-5p	147	ADRA1B	NM_000679	Pictar
hsa-miR-32-5p	147	ADRA1B	NM_000679	Targetscan
hsa-miR-10a-5p	148	ADRA1A	AY491776	Miranda
hsa-miR-10a-5p	148	ADRA1A	NM_033303	Miranda
hsa-miR-132-3p	148	ADRA1A	NM_033302	Miranda
hsa-miR-132-3p	148	ADRA1A	NM_033302	Targetscan
hsa-miR-32-5p	148	ADRA1A	AY491776	Miranda
hsa-miR-32-5p	148	ADRA1A	NM_033303	Miranda
hsa-miR-33a-5p	148	ADRA1A	NM_033302	Miranda
hsa-miR-33a-5p	148	ADRA1A	NM_033302	Targetscan
hsa-miR-876-3p	148	ADRA1A	NM_033302	Targetscan
hsa-miR-876-3p	148	ADRA1A	NM_000680	PITA
hsa-miR-876-5p	148	ADRA1A	NM_033302	Targetscan
hsa-miR-135a-3p	150	ADRA2A	NM_000681	Miranda
hsa-miR-135a-3p	150	ADRA2A	NM_000681	Eimmo
hsa-miR-135a-3p	150	ADRA2A	NM_000681	Targetscan
hsa-miR-135a-3p	150	ADRA2A	NM_000681	PITA
hsa-miR-152	150	ADRA2A	NM_000681	Miranda
hsa-miR-181d	150	ADRA2A	NM_000681	Miranda
hsa-miR-32-5p	150	ADRA2A	NM_000681	Miranda
hsa-miR-32-5p	150	ADRA2A	NM_000681	Targetscan
hsa-miR-33a-5p	150	ADRA2A	NM_000681	Miranda
hsa-miR-33a-5p	150	ADRA2A	NM_000681	Targetscan
hsa-miR-34a-5p	150	ADRA2A	NM_000681	Targetscan
hsa-miR-7-5p	150	ADRA2A	NM_000681	Targetscan
hsa-miR-873-5p	150	ADRA2A	NM_000681	Pictar
hsa-miR-873-5p	150	ADRA2A	NM_000681	Targetscan
hsa-miR-876-3p	150	ADRA2A	NM_000681	Targetscan
hsa-miR-876-5p	150	ADRA2A	NM_000681	Miranda
hsa-miR-876-5p	150	ADRA2A	NM_000681	Targetscan
hsa-miR-32-5p	151	ADRA2B	NM_000682	Targetscan
hsa-miR-34a-5p	151	ADRA2B	NM_000682	Miranda
hsa-miR-34a-5p	151	ADRA2B	NM_000682	Targetscan
hsa-miR-34a-5p	151	ADRA2B	NM_000682	PITA
hsa-miR-362-3p	151	ADRA2B	NM_000682	Miranda
hsa-miR-362-3p	151	ADRA2B	NM_000682	PITA
hsa-miR-7-5p	151	ADRA2B	NM_000682	Miranda
hsa-miR-7-5p	151	ADRA2B	NM_000682	Targetscan
hsa-miR-7-5p	151	ADRA2B	NM_000682	PITA
hsa-miR-873-5p	151	ADRA2B	NM_000682	Targetscan
hsa-miR-1271-5p	152	ADRA2C	NM_000683	Miranda
hsa-miR-32-5p	152	ADRA2C	NM_000683	Targetscan
hsa-miR-4687-3p	152	ADRA2C	NM_000683	Pictar
hsa-miR-152	153	ADRB1	NM_000684	Miranda
hsa-miR-32-5p	153	ADRB1	NM_000684	Miranda
hsa-miR-32-5p	153	ADRB1	NM_000684	Eimmo
hsa-miR-32-5p	153	ADRB1	NM_000684	Targetscan
hsa-miR-32-5p	153	ADRB1	NM_000684	PITA
hsa-miR-362-3p	153	ADRB1	NM_000684	Miranda
hsa-miR-373-5p	153	ADRB1	NM_000684	Miranda
hsa-miR-373-5p	153	ADRB1	NM_000684	PITA
hsa-miR-876-3p	153	ADRB1	NM_000684	Targetscan
hsa-miR-876-5p	153	ADRB1	NM_000684	Targetscan
hsa-miR-200c-3p	154	ADRB2	NM_000024	Eimmo
hsa-miR-32-5p	154	ADRB2	NM_000024	Targetscan
hsa-miR-10a-5p	155	ADRB3	NM_000025	Targetscan
hsa-miR-32-5p	155	ADRB3	NM_000025	Targetscan
hsa-miR-33a-5p	155	ADRB3	NM_000025	Targetscan
hsa-miR-362-3p	155	ADRB3	NM_000025	Miranda
hsa-miR-873-5p	155	ADRB3	NM_000025	Targetscan
hsa-miR-876-3p	155	ADRB3	NM_000025	Targetscan
hsa-miR-876-5p	155	ADRB3	NM_000025	Miranda
hsa-miR-876-5p	155	ADRB3	NM_000025	Targetscan
hsa-miR-1227-5p	156	GRK2	NM_001619	Pictar
hsa-miR-181d	156	ADRBK1	NM_001619	Miranda
hsa-miR-181d	156	ADRBK1	NM_001619	PITA
hsa-miR-181d	156	GRK2	NM_001619	mirDB
hsa-miR-29c-5p	156	ADRBK1	NM_001619	Miranda
hsa-miR-7-5p	156	ADRBK1	NM_001619	Targetscan
hsa-miR-718	156	GRK2	NM_001619	Pictar
hsa-miR-132-3p	157	ADRBK2	NM_005160	Targetscan
hsa-miR-135a-3p	157	ADRBK2	NM_005160	Targetscan
hsa-miR-152	157	ADRBK2	AK310398	Miranda
hsa-miR-181d	157	GRK3	NM_005160	Eimmo
hsa-miR-32-5p	157	ADRBK2	NM_005160	Targetscan
hsa-miR-34a-5p	157	ADRBK2	NM_005160	Targetscan
hsa-miR-373-5p	157	GRK3	NM_005160	Eimmo
hsa-miR-505-3p	157	ADRBK2	NM_005160	Targetscan
hsa-miR-505-5p	157	ADRBK2	NM_005160	Targetscan
hsa-miR-532-5p	157	ADRBK2	NM_005160	PITA
hsa-miR-7-5p	157	ADRBK2	NM_005160	Targetscan
hsa-miR-876-3p	157	ADRBK2	NM_005160	Targetscan
hsa-miR-876-5p	157	ADRBK2	NM_005160	Targetscan
hsa-miR-876-5p	157	GRK3	NM_005160	Eimmo
hsa-miR-876-5p	157	GRK3	NM_005160	mirDB
hsa-miR-1271-5p	158	ADSL	AK308662	Miranda
hsa-miR-210	158	ADSL	AK308662	Miranda
hsa-miR-373-5p	158	ADSL	AK308662	Miranda
hsa-miR-1271-5p	159	ADSS	NM_001126	Miranda
hsa-miR-135a-3p	159	ADSS	NM_001126	Miranda
hsa-miR-135a-3p	159	ADSS	NM_001126	Targetscan
hsa-miR-181d	159	ADSS	NM_001126	Miranda
hsa-miR-200c-3p	159	ADSS	NM_001126	Miranda
hsa-miR-32-5p	159	ADSS	NM_001126	Targetscan
hsa-miR-33a-5p	159	ADSS	NM_001126	Miranda
hsa-miR-33a-5p	159	ADSS	NM_001126	Targetscan
hsa-miR-32-5p	160	AP2A1	NM_014203	Targetscan
hsa-miR-32-5p	160	AP2A1	NM_130787	Targetscan
hsa-miR-10a-5p	161	AP2A2	NM_001242837	Targetscan
hsa-miR-10a-5p	161	AP2A2	NM_012305	Targetscan
hsa-miR-132-3p	161	AP2A2	NM_001242837	Targetscan
hsa-miR-132-3p	161	AP2A2	NM_012305	Targetscan
hsa-miR-152	161	AP2A2	AB209422	Miranda
hsa-miR-210	161	AP2A2	AK027891	Miranda
hsa-miR-32-5p	161	AP2A2	NM_012305	Targetscan
hsa-miR-32-5p	161	AP2A2	NM_001242837	Targetscan
hsa-miR-34a-5p	161	AP2A2	AB209422	Miranda
hsa-miR-362-3p	161	AP2A2	AK027891	Miranda
hsa-miR-362-3p	161	AP2A2	AB209422	Miranda
hsa-miR-873-5p	161	AP2A2	NM_001242837	Targetscan
hsa-miR-873-5p	161	AP2A2	NM_012305	Targetscan
hsa-miR-132-3p	162	AP1B1	BX537680	Miranda
hsa-miR-32-5p	162	AP1B1	NM_001127	Targetscan
hsa-miR-32-5p	162	AP1B1	NM_001166019	Targetscan
hsa-miR-32-5p	162	AP1B1	NM_145730	Targetscan
hsa-miR-34a-5p	162	AP1B1	NM_001127	Miranda
hsa-miR-34a-5p	162	AP1B1	NM_145730	Targetscan
hsa-miR-34a-5p	162	AP1B1	NM_001127	Targetscan
hsa-miR-34a-5p	162	AP1B1	NM_001166019	Targetscan
hsa-miR-1271-5p	163	AP2B1	NM_001030006	Miranda
hsa-miR-1271-5p	163	AP2B1	NM_001282	Eimmo
hsa-miR-1271-5p	163	AP2B1	NM_001030006	Eimmo
hsa-miR-1271-5p	163	AP2B1	NM_001030006;NM_001282	PITA
hsa-miR-32-5p	163	AP2B1	NM_001282	Targetscan
hsa-miR-32-5p	163	AP2B1	NM_001030006	Targetscan
hsa-miR-373-5p	163	AP2B1	NM_001030006	Miranda
hsa-miR-373-5p	163	AP2B1	NM_001282	Eimmo
hsa-miR-373-5p	163	AP2B1	NM_001030006	Eimmo
hsa-miR-873-5p	163	AP2B1	NM_001030006	Miranda
hsa-miR-873-5p	163	AP2B1	NM_001282	Targetscan
hsa-miR-873-5p	163	AP2B1	NM_001030006	Targetscan
hsa-miR-10a-5p	164	AP1G1	NM_001030007	Targetscan
hsa-miR-10a-5p	164	AP1G1	NM_001128	Targetscan
hsa-miR-1271-5p	164	AP1G1	NM_001128	Miranda
hsa-miR-132-3p	164	AP1G1	NM_001128	Miranda
hsa-miR-132-3p	164	AP1G1	NM_001030007	Targetscan
hsa-miR-132-3p	164	AP1G1	NM_001128	Targetscan
hsa-miR-132-3p	164	AP1G1	NM_001030007;NM_001128	PITA
hsa-miR-152	164	AP1G1	NM_001030007	Eimmo
hsa-miR-152	164	AP1G1	NM_001128	Eimmo
hsa-miR-181d	164	AP1G1	NM_001128	Miranda
hsa-miR-181d	164	AP1G1	NM_001030007	Eimmo
hsa-miR-181d	164	AP1G1	NM_001128	Eimmo
hsa-miR-181d	164	AP1G1	NM_001030007;NM_001128	PITA
hsa-miR-215	164	AP1G1	NM_001128	Miranda
hsa-miR-29c-5p	164	AP1G1	NM_001128	Miranda
hsa-miR-29c-5p	164	AP1G1	NM_001030007	Eimmo
hsa-miR-29c-5p	164	AP1G1	NM_001128	Eimmo
hsa-miR-29c-5p	164	AP1G1	NM_001030007;NM_001128	PITA
hsa-miR-32-5p	164	AP1G1	NM_001128	Miranda
hsa-miR-32-5p	164	AP1G1	NM_001030007	Targetscan
hsa-miR-32-5p	164	AP1G1	NM_001128	Targetscan
hsa-miR-33a-5p	164	AP1G1	NM_001128	Miranda
hsa-miR-33a-5p	164	AP1G1	NM_001128	Targetscan
hsa-miR-33a-5p	164	AP1G1	NM_001030007	Targetscan
hsa-miR-362-3p	164	AP1G1	NM_001128	Pictar
hsa-miR-362-3p	164	AP1G1	NM_001030007	Pictar
hsa-miR-3652	164	AP1G1	NM_001128	Pictar
hsa-miR-3652	164	AP1G1	NM_001030007	Pictar
hsa-miR-4687-3p	164	AP1G1	NM_001128	Pictar
hsa-miR-4687-3p	164	AP1G1	NM_001030007	Pictar
hsa-miR-505-5p	164	AP1G1	NM_001128	Pictar
hsa-miR-505-5p	164	AP1G1	NM_001030007	Pictar
hsa-miR-7-5p	164	AP1G1	NM_001128	Targetscan
hsa-miR-7-5p	164	AP1G1	NM_001030007	Targetscan
hsa-miR-135a-3p	165	AEBP1	NM_001129	Miranda
hsa-miR-10a-5p	167	CRISP1	NM_001131	Miranda
hsa-miR-10a-5p	167	CRISP1	NM_170609	Miranda
hsa-miR-10a-5p	167	CRISP1	NM_001131	Targetscan
hsa-miR-10a-5p	167	CRISP1	NM_001205220	Targetscan
hsa-miR-10a-5p	167	CRISP1	NM_170609	Targetscan
hsa-miR-152	167	CRISP1	NM_001131	Miranda
hsa-miR-152	167	CRISP1	NM_170609	Miranda
hsa-miR-215	167	CRISP1	NM_001131	Miranda
hsa-miR-215	167	CRISP1	NM_170609	Miranda
hsa-miR-10a-5p	172	AFG3L1	NR_003227	Miranda
hsa-miR-10a-5p	172	AFG3L1	AK128804	Miranda
hsa-miR-10a-5p	172	AFG3L1	AK128352	Miranda
hsa-miR-10a-5p	172	AFG3L1	AK056488	Miranda
hsa-miR-10a-5p	172	AFG3L1	AK126911	Miranda
hsa-miR-10a-5p	172	AFG3L1	NR_003226	Miranda
hsa-miR-132-3p	172	AFG3L1	BC045753	Miranda
hsa-miR-200c-3p	172	AFG3L1	NR_003227	Miranda
hsa-miR-200c-3p	172	AFG3L1	BC045753	Miranda
hsa-miR-200c-3p	172	AFG3L1	NR_003228	Miranda
hsa-miR-200c-3p	172	AFG3L1	AK128804	Miranda
hsa-miR-200c-3p	172	AFG3L1	AK056488	Miranda
hsa-miR-200c-3p	172	AFG3L1	AK126911	Miranda
hsa-miR-200c-3p	172	AFG3L1	NR_003226	Miranda
hsa-miR-210	172	AFG3L1	AF329692	Miranda
hsa-miR-373-5p	172	AFG3L1	NR_003227	Miranda
hsa-miR-373-5p	172	AFG3L1	BC045753	Miranda
hsa-miR-373-5p	172	AFG3L1	NR_003228	Miranda
hsa-miR-373-5p	172	AFG3L1	AK128804	Miranda
hsa-miR-373-5p	172	AFG3L1	AK056488	Miranda
hsa-miR-373-5p	172	AFG3L1	AK126911	Miranda
hsa-miR-373-5p	172	AFG3L1	NR_003226	Miranda
hsa-miR-873-5p	172	AFG3L1	NR_003227	Miranda
hsa-miR-873-5p	172	AFG3L1	NR_003228	Miranda
hsa-miR-873-5p	172	AFG3L1	AK128352	Miranda
hsa-miR-873-5p	172	AFG3L1	AF329692	Miranda
hsa-miR-873-5p	172	AFG3L1	AK056488	Miranda
hsa-miR-873-5p	172	AFG3L1	AK126911	Miranda
hsa-miR-873-5p	172	AFG3L1	NR_003226	Miranda
hsa-miR-873-5p	173	AFM	NM_001133	Miranda
hsa-miR-873-5p	173	AFM	NM_001133	Targetscan
hsa-miR-362-3p	174	AFP	NM_001134	Miranda
hsa-miR-152	175	AGA	NM_000027	Miranda
hsa-miR-200c-3p	175	AGA	NM_000027	Miranda
hsa-miR-373-5p	175	AGA	NM_000027	Miranda
hsa-miR-135a-3p	176	ACAN	BC036445	Miranda
hsa-miR-181d	176	ACAN	NM_013227	Miranda
hsa-miR-32-5p	176	ACAN	NM_013227	Miranda
hsa-miR-32-5p	176	ACAN	NM_001135;NM_013227	PITA
hsa-miR-362-3p	176	ACAN	BC036445	Miranda
hsa-miR-873-5p	176	ACAN	NM_013227	Miranda
hsa-miR-873-5p	176	ACAN	BC036445	Miranda
hsa-miR-873-5p	176	ACAN	NM_013227	Pictar
hsa-miR-873-5p	176	ACAN	NM_001135	Pictar
hsa-miR-873-5p	176	ACAN	NM_013227	Targetscan
hsa-miR-873-5p	176	ACAN	NM_001135	Targetscan
hsa-miR-10a-5p	178	AGL	NM_000642	Miranda
hsa-miR-181d	178	AGL	NM_000642	Miranda
hsa-miR-200c-3p	178	AGL	NM_000642	Miranda
hsa-miR-32-5p	178	AGL	NM_000642	Targetscan
hsa-miR-32-5p	178	AGL	NM_000028	Targetscan
hsa-miR-32-5p	178	AGL	NM_000643	Targetscan
hsa-miR-32-5p	178	AGL	NM_000644	Targetscan
hsa-miR-32-5p	178	AGL	NM_000645	Targetscan
hsa-miR-32-5p	178	AGL	NM_000646	Targetscan
hsa-miR-33a-5p	178	AGL	NM_000643	Pictar
hsa-miR-33a-5p	178	AGL	NM_000646	Pictar
hsa-miR-33a-5p	178	AGL	NM_000642	Pictar
hsa-miR-33a-5p	178	AGL	NM_000645	Pictar
hsa-miR-33a-5p	178	AGL	NM_000028	Pictar
hsa-miR-33a-5p	178	AGL	NM_000644	Pictar
hsa-miR-7-5p	178	AGL	NM_000643	Targetscan
hsa-miR-7-5p	178	AGL	NM_000642	Targetscan
hsa-miR-7-5p	178	AGL	NM_000028	Targetscan
hsa-miR-7-5p	178	AGL	NM_000646	Targetscan
hsa-miR-7-5p	178	AGL	NM_000645	Targetscan
hsa-miR-7-5p	178	AGL	NM_000644	Targetscan
hsa-miR-876-3p	178	AGL	NM_000646	Targetscan
hsa-miR-876-3p	178	AGL	NM_000644	Targetscan
hsa-miR-876-3p	178	AGL	NM_000643	Targetscan
hsa-miR-876-3p	178	AGL	NM_000645	Targetscan
hsa-miR-876-3p	178	AGL	NM_000642	Targetscan
hsa-miR-876-3p	178	AGL	NM_000028	Targetscan
hsa-miR-876-5p	178	AGL	NM_000642	Miranda
hsa-miR-876-5p	178	AGL	NM_000644	Eimmo
hsa-miR-876-5p	178	AGL	NM_000645	Eimmo
hsa-miR-876-5p	178	AGL	NM_000646	Eimmo
hsa-miR-876-5p	178	AGL	NM_000642	Eimmo
hsa-miR-876-5p	178	AGL	NM_000028	Eimmo
hsa-miR-876-5p	178	AGL	NM_000643	Eimmo
hsa-miR-876-5p	178	AGL	NM_000646	Targetscan
hsa-miR-876-5p	178	AGL	NM_000644	Targetscan
hsa-miR-876-5p	178	AGL	NM_000643	Targetscan
hsa-miR-876-5p	178	AGL	NM_000645	Targetscan
hsa-miR-876-5p	178	AGL	NM_000642	Targetscan
hsa-miR-876-5p	178	AGL	NM_000028	Targetscan
hsa-miR-135a-3p	182	JAG1	NM_000214	Miranda
hsa-miR-200c-3p	182	JAG1	NM_000214	Miranda
hsa-miR-33a-5p	182	JAG1	NM_000214	Miranda
hsa-miR-34a-5p	182	JAG1	NM_000214	Miranda
hsa-miR-34a-5p	182	JAG1	NM_000214	Eimmo
hsa-miR-34a-5p	182	JAG1	NM_000214	Pictar
hsa-miR-34a-5p	182	JAG1	NM_000214	Targetscan
hsa-miR-34a-5p	182	JAG1	NM_000214	PITA
hsa-miR-7-5p	182	JAG1	NM_000214	Targetscan
hsa-miR-181d	183	AGT	NM_000029	Miranda
hsa-miR-181d	183	AGT	CR606672	Miranda
hsa-miR-34a-5p	183	AGT	CR606672	Miranda
hsa-miR-152	185	AGTR1	NM_004835	Miranda
hsa-miR-181d	185	AGTR1	NM_004835	Miranda
hsa-miR-33a-5p	185	AGTR1	NM_009585	Targetscan
hsa-miR-33a-5p	185	AGTR1	NM_004835	Targetscan
hsa-miR-33a-5p	185	AGTR1	NM_031850	Targetscan
hsa-miR-33a-5p	185	AGTR1	NM_032049	Targetscan
hsa-miR-33a-5p	185	AGTR1	NM_000685	Targetscan
hsa-miR-34a-5p	185	AGTR1	NM_004835	Miranda
hsa-miR-34a-5p	185	AGTR1	NM_004835	Targetscan
hsa-miR-34a-5p	185	AGTR1	NM_009585	Targetscan
hsa-miR-34a-5p	185	AGTR1	NM_000685	Targetscan
hsa-miR-34a-5p	185	AGTR1	NM_031850	Targetscan
hsa-miR-34a-5p	185	AGTR1	NM_032049	Targetscan
hsa-miR-373-5p	185	AGTR1	NM_004835	Miranda
hsa-miR-7-5p	185	AGTR1	NM_004835	Miranda
hsa-miR-7-5p	185	AGTR1	NM_031850	Targetscan
hsa-miR-7-5p	185	AGTR1	NM_032049	Targetscan
hsa-miR-7-5p	185	AGTR1	NM_009585	Targetscan
hsa-miR-7-5p	185	AGTR1	NM_004835	Targetscan
hsa-miR-7-5p	185	AGTR1	NM_000685	Targetscan
hsa-miR-873-5p	185	AGTR1	NM_004835	Miranda
hsa-miR-1299	186	AGTR2	NM_000686	Eimmo
hsa-miR-32-5p	186	AGTR2	NM_000686	Miranda
hsa-miR-373-5p	186	AGTR2	NM_000686	Miranda
hsa-miR-373-5p	186	AGTR2	NM_000686	Eimmo
hsa-miR-135a-3p	187	APLNR	NM_005161	Miranda
hsa-miR-135a-3p	187	APLNR	NM_005161	Targetscan
hsa-miR-152	187	APLNR	NM_005161	Miranda
hsa-miR-29c-5p	187	APLNR	NM_005161	Miranda
hsa-miR-29c-5p	187	APLNR	NM_005161	Eimmo
hsa-miR-32-5p	187	APLNR	NM_005161	Targetscan
hsa-miR-33a-5p	187	APLNR	NM_005161	Targetscan
hsa-miR-34a-5p	187	APLNR	NM_005161	Miranda
hsa-miR-34a-5p	187	APLNR	NM_005161	Targetscan
hsa-miR-373-5p	187	APLNR	NM_005161	Miranda
hsa-miR-873-5p	187	APLNR	NM_005161	Eimmo
hsa-miR-873-5p	187	APLNR	NM_005161	Targetscan
hsa-miR-200c-3p	190	NR0B1	NM_000475	Miranda
hsa-miR-132-3p	191	AHCY	NM_000687	Miranda
hsa-miR-132-3p	191	AHCY	NM_000687	Targetscan
hsa-miR-132-3p	191	AHCY	NM_001161766	Targetscan
hsa-miR-135a-3p	191	AHCY	NM_000687	Miranda
hsa-miR-34a-5p	191	AHCY	AK309204	Miranda
hsa-miR-7-5p	191	AHCY	NM_000687	Miranda
hsa-miR-7-5p	191	AHCY	NM_000687	Targetscan
hsa-miR-7-5p	191	AHCY	NM_001161766	Targetscan
hsa-miR-873-5p	191	AHCY	NM_001161766	Targetscan
hsa-miR-873-5p	191	AHCY	NM_000687	Targetscan
hsa-miR-1271-5p	196	AHR	NM_001621	Miranda
hsa-miR-1271-5p	196	AHR	BC070080	Miranda
hsa-miR-1271-5p	196	AHR	NM_001621	Eimmo
hsa-miR-135a-3p	196	AHR	NM_001621	Miranda
hsa-miR-135a-3p	196	AHR	BC070080	Miranda
hsa-miR-152	196	AHR	NM_001621	Miranda
hsa-miR-152	196	AHR	BC070080	Miranda
hsa-miR-181d	196	AHR	NM_001621	Miranda
hsa-miR-181d	196	AHR	NM_001621	Eimmo
hsa-miR-200c-3p	196	AHR	NM_001621	Miranda
hsa-miR-200c-3p	196	AHR	BC070080	Miranda
hsa-miR-215	196	AHR	BC070080	Miranda
hsa-miR-29c-5p	196	AHR	NM_001621	Miranda
hsa-miR-29c-5p	196	AHR	BC070080	Miranda
hsa-miR-29c-5p	196	AHR	NM_001621	Eimmo
hsa-miR-29c-5p	196	AHR	NM_001621	PITA
hsa-miR-32-5p	196	AHR	NM_001621	Miranda
hsa-miR-32-5p	196	AHR	NM_001621	Targetscan
hsa-miR-373-5p	196	AHR	NM_001621	Miranda
hsa-miR-505-3p	196	AHR	NM_001621	Miranda
hsa-miR-505-3p	196	AHR	NM_001621	Targetscan
hsa-miR-505-5p	196	AHR	NM_001621	Miranda
hsa-miR-505-5p	196	AHR	NM_001621	Targetscan
hsa-miR-7-5p	196	AHR	NM_001621	Targetscan
hsa-miR-873-5p	196	AHR	BC070080	Miranda
hsa-miR-876-3p	196	AHR	NM_001621	Targetscan
hsa-miR-876-5p	196	AHR	BC070080	Miranda
hsa-miR-876-5p	196	AHR	NM_001621	Targetscan
hsa-miR-29c-5p	197	AHSG	NM_001622	Miranda
hsa-miR-33a-5p	197	AHSG	NM_001622	Targetscan
hsa-miR-34a-5p	197	AHSG	CR590880	Miranda
hsa-miR-505-3p	197	AHSG	NM_001622	Targetscan
hsa-miR-505-5p	197	AHSG	NM_001622	Targetscan
hsa-miR-876-5p	197	AHSG	CR590880	Miranda
hsa-miR-135a-3p	199	AIF1	NM_004847	Miranda
hsa-miR-135a-3p	199	AIF1	NM_001623	Miranda
hsa-miR-7-5p	199	AIF1	NM_004847	Targetscan
hsa-miR-10a-5p	202	AIM1	NM_001624	Targetscan
hsa-miR-181d	202	AIM1	NM_001624	Miranda
hsa-miR-29c-5p	202	AIM1	NM_001624	Miranda
hsa-miR-29c-5p	202	AIM1	NM_001624	Eimmo
hsa-miR-32-5p	202	AIM1	NM_001624	Targetscan
hsa-miR-33a-5p	202	AIM1	NM_001624	Targetscan
hsa-miR-7-5p	202	AIM1	NM_001624	Targetscan
hsa-miR-152	203	AK1	NM_000476	Miranda
hsa-miR-29c-5p	203	AK1	NM_000476	Miranda
hsa-miR-3652	203	AK1	NM_000476	Pictar
hsa-miR-6722-3p	203	AK1	NM_000476	Pictar
hsa-miR-876-3p	203	AK1	NM_000476	Targetscan
hsa-miR-876-5p	203	AK1	NM_000476	Targetscan
hsa-miR-10a-5p	204	AK2	NM_001625	Targetscan
hsa-miR-132-3p	204	AK2	AK307731	Miranda
hsa-miR-132-3p	204	AK2	NM_013411	Targetscan
hsa-miR-132-3p	204	AK2	NM_001199199	Targetscan
hsa-miR-152	204	AK2	AK307731	Miranda
hsa-miR-181a-2-3p	204	AK2	NM_001625	mirDB
hsa-miR-32-5p	204	AK2	AK307731	Miranda
hsa-miR-32-5p	204	AK2	NM_001199199	Targetscan
hsa-miR-32-5p	204	AK2	NM_013411	Targetscan
hsa-miR-32-5p	204	AK2	NM_001625	Targetscan
hsa-miR-33a-5p	204	AK2	NM_001199199	Targetscan
hsa-miR-33a-5p	204	AK2	NM_013411	Targetscan
hsa-miR-34a-5p	204	AK2	NM_013411	Targetscan
hsa-miR-34a-5p	204	AK2	NM_001199199	Targetscan
hsa-miR-373-5p	204	AK2	NM_001625	Miranda
hsa-miR-373-5p	204	AK2	NM_001625	PITA
hsa-miR-7-5p	204	AK2	NM_001625	Targetscan
hsa-miR-873-5p	204	AK2	NM_001199199	Pictar
hsa-miR-873-5p	204	AK2	NM_013411	Pictar
hsa-miR-873-5p	204	AK2	NM_001625	Pictar
hsa-miR-873-5p	204	AK2	NM_001625	Targetscan
hsa-miR-873-5p	204	AK2	NM_001199199	Targetscan
hsa-miR-873-5p	204	AK2	NM_013411	Targetscan
hsa-miR-873-5p	204	AK2	NR_037592	Pictar
hsa-miR-873-5p	204	AK2	NR_037591	Pictar
hsa-miR-132-3p	205	AK4	NM_001005353	Targetscan
hsa-miR-132-3p	205	AK4	NM_013410	Targetscan
hsa-miR-132-3p	205	AK4	NM_203464	Targetscan
hsa-miR-135a-3p	205	AK3L1	NM_203464	Miranda
hsa-miR-135a-3p	205	AK4	NM_013410	Eimmo
hsa-miR-135a-3p	205	AK4	NM_203464	Eimmo
hsa-miR-135a-3p	205	AK4	NM_001005353	Eimmo
hsa-miR-135a-3p	205	AK4	NM_013410	Targetscan
hsa-miR-135a-3p	205	AK4	NM_001005353	Targetscan
hsa-miR-135a-3p	205	AK4	NM_203464	Targetscan
hsa-miR-152	205	AK3L1	NM_203464	Miranda
hsa-miR-29c-5p	205	AK3L1	NM_203464	Miranda
hsa-miR-29c-5p	205	AK3L1	NM_001005353;NM_013410;NM_203464	PITA
hsa-miR-29c-5p	205	AK4	NM_013410	Eimmo
hsa-miR-29c-5p	205	AK4	NM_203464	Eimmo
hsa-miR-29c-5p	205	AK4	NM_001005353	Eimmo
hsa-miR-32-5p	205	AK4	NM_203464	Targetscan
hsa-miR-32-5p	205	AK4	NM_013410	Targetscan
hsa-miR-32-5p	205	AK4	NM_001005353	Targetscan
hsa-miR-34a-5p	205	AK4	NM_203464	Targetscan
hsa-miR-34a-5p	205	AK4	NM_013410	Targetscan
hsa-miR-34a-5p	205	AK4	NM_001005353	Targetscan
hsa-miR-362-3p	205	AK3L1	NM_203464	Miranda
hsa-miR-362-3p	205	AK4	NM_013410	Eimmo
hsa-miR-362-3p	205	AK4	NM_203464	Eimmo
hsa-miR-362-3p	205	AK4	NM_001005353	Eimmo
hsa-miR-362-3p	205	AK4	NM_013410	mirDB
hsa-miR-362-3p	205	AK4	NM_001005353	mirDB
hsa-miR-362-3p	205	AK4	NM_203464	mirDB
hsa-miR-373-5p	205	AK3L1	NM_203464	Miranda
hsa-miR-873-5p	205	AK4	NM_013410	Eimmo
hsa-miR-873-5p	205	AK4	NM_203464	Eimmo
hsa-miR-873-5p	205	AK4	NM_001005353	Eimmo
hsa-miR-873-5p	205	AK4	NM_203464	Targetscan
hsa-miR-873-5p	205	AK4	NM_013410	Targetscan
hsa-miR-873-5p	205	AK4	NM_001005353	Targetscan
hsa-miR-200c-3p	207	AKT1	NM_001014431	Miranda
hsa-miR-373-5p	207	AKT1	NM_001014431	Miranda
hsa-miR-181d	208	AKT2	NM_001626	Miranda
hsa-miR-200c-3p	208	AKT2	NM_001626	PITA
hsa-miR-29c-5p	208	AKT2	NM_001626	Miranda
hsa-miR-32-5p	208	AKT2	NM_001626	Targetscan
hsa-miR-33a-5p	208	AKT2	NM_001626	Targetscan
hsa-miR-34a-5p	208	AKT2	NM_001626	Targetscan
hsa-miR-373-5p	208	AKT2	AK304209	Miranda
hsa-miR-373-5p	208	AKT2	NM_001626	Miranda
hsa-miR-373-5p	208	AKT2	NM_001626	Eimmo
hsa-miR-7-5p	208	AKT2	NM_001626	Targetscan
hsa-miR-873-5p	208	AKT2	AK308906	Miranda
hsa-miR-32-5p	210	ALAD	NM_000031	Targetscan
hsa-miR-33a-5p	210	ALAD	NM_000031	Targetscan
hsa-miR-873-5p	210	ALAD	NM_000031	Miranda
hsa-miR-873-5p	210	ALAD	NM_000031	Targetscan
hsa-miR-132-3p	213	ALB	NM_000477	Miranda
hsa-miR-132-3p	213	ALB	CR603655	Miranda
hsa-miR-132-3p	213	ALB	NM_000477	Targetscan
hsa-miR-152	213	ALB	NM_000477	Miranda
hsa-miR-152	213	ALB	CR604028	Miranda
hsa-miR-152	213	ALB	CR603655	Miranda
hsa-miR-181d	213	ALB	CR604028	Miranda
hsa-miR-373-5p	213	ALB	NM_000477	Miranda
hsa-miR-373-5p	213	ALB	CR603655	Miranda
hsa-miR-7-5p	213	ALB	CR604028	Miranda
hsa-miR-10a-5p	214	ALCAM	NM_001627	Miranda
hsa-miR-135a-3p	214	ALCAM	NM_001627	Miranda
hsa-miR-135a-3p	214	ALCAM	NM_001627	Targetscan
hsa-miR-135a-3p	214	ALCAM	NM_001627	PITA
hsa-miR-152	214	ALCAM	NM_001627	Miranda
hsa-miR-152	214	ALCAM	NM_001627	Eimmo
hsa-miR-152	214	ALCAM	NM_001627	PITA
hsa-miR-181d	214	ALCAM	NM_001627	Miranda
hsa-miR-200c-3p	214	ALCAM	NM_001627	Miranda
hsa-miR-200c-3p	214	ALCAM	AY644765	Miranda
hsa-miR-200c-3p	214	ALCAM	NM_001627	Eimmo
hsa-miR-215	214	ALCAM	NM_001627	Miranda
hsa-miR-215	214	ALCAM	NM_001627	PITA
hsa-miR-32-5p	214	ALCAM	AK054632	Miranda
hsa-miR-32-5p	214	ALCAM	NM_001627	Targetscan
hsa-miR-33a-5p	214	ALCAM	NM_001627	Miranda
hsa-miR-33a-5p	214	ALCAM	NM_001627	Eimmo
hsa-miR-34a-5p	214	ALCAM	NM_001627	Miranda
hsa-miR-34a-5p	214	ALCAM	AK054632	Miranda
hsa-miR-34a-5p	214	ALCAM	NM_001627	Eimmo
hsa-miR-34a-5p	214	ALCAM	NM_001627	Targetscan
hsa-miR-34a-5p	214	ALCAM	NM_001627	PITA
hsa-miR-362-3p	214	ALCAM	NM_001627	Miranda
hsa-miR-373-5p	214	ALCAM	NM_001627	Miranda
hsa-miR-373-5p	214	ALCAM	AK301804	Miranda
hsa-miR-7-5p	214	ALCAM	NM_001627	Miranda
hsa-miR-7-5p	214	ALCAM	NM_001627	Targetscan
hsa-miR-1271-5p	215	ABCD1	CR599919	Miranda
hsa-miR-1271-5p	215	ABCD1	NM_000033	Miranda
hsa-miR-1271-5p	215	ABCD1	NM_000033	Eimmo
hsa-miR-1271-5p	215	ABCD1	NM_000033	PITA
hsa-miR-210	215	ABCD1	NM_000033	Targetscan
hsa-miR-32-5p	215	ABCD1	NM_000033	Targetscan
hsa-miR-34a-5p	215	ABCD1	NM_000033	Miranda
hsa-miR-34a-5p	215	ABCD1	NM_000033	Targetscan
hsa-miR-132-3p	216	ALDH1A1	AK302168	Miranda
hsa-miR-132-3p	216	ALDH1A1	NM_000689	Miranda
hsa-miR-132-3p	216	ALDH1A1	NM_000689	Targetscan
hsa-miR-181d	216	ALDH1A1	AK302168	Miranda
hsa-miR-181d	216	ALDH1A1	NM_000689	Miranda
hsa-miR-200c-3p	216	ALDH1A1	AK302168	Miranda
hsa-miR-200c-3p	216	ALDH1A1	NM_000689	Miranda
hsa-miR-135a-3p	219	ALDH1B1	NM_000692	Miranda
hsa-miR-135a-3p	219	ALDH1B1	NM_000692	Targetscan
hsa-miR-29b-1-5p	219	ALDH1B1	NM_000692	mirDB
hsa-miR-32-5p	219	ALDH1B1	NM_000692	Targetscan
hsa-miR-7-5p	219	ALDH1B1	NM_000692	Miranda
hsa-miR-876-3p	219	ALDH1B1	NM_000692	Targetscan
hsa-miR-876-5p	219	ALDH1B1	NM_000692	Eimmo
hsa-miR-876-5p	219	ALDH1B1	NM_000692	Targetscan
hsa-miR-200c-3p	220	ALDH1A3	NM_000693	Miranda
hsa-miR-200c-3p	220	ALDH1A3	NM_000693	PITA
hsa-miR-32-5p	220	ALDH1A3	NM_000693	Miranda
hsa-miR-32-5p	220	ALDH1A3	NM_000693	Targetscan
hsa-miR-505-3p	220	ALDH1A3	NM_000693	Miranda
hsa-miR-505-3p	220	ALDH1A3	NM_000693	Targetscan
hsa-miR-505-5p	220	ALDH1A3	NM_000693	Miranda
hsa-miR-505-5p	220	ALDH1A3	NM_000693	Targetscan
hsa-miR-7-5p	220	ALDH1A3	NM_000693	Miranda
hsa-miR-7-5p	220	ALDH1A3	NM_000693	Targetscan
hsa-miR-132-3p	221	ALDH3B1	NM_001030010	Miranda
hsa-miR-132-3p	221	ALDH3B1	NM_000694	Targetscan
hsa-miR-132-3p	221	ALDH3B1	NM_001030010	Targetscan
hsa-miR-132-3p	221	ALDH3B1	NM_001161473	Targetscan
hsa-miR-7-5p	221	ALDH3B1	NM_001030010	Targetscan
hsa-miR-7-5p	221	ALDH3B1	NM_001161473	Targetscan
hsa-miR-7-5p	221	ALDH3B1	NM_000694	Targetscan
hsa-miR-34a-5p	222	ALDH3B2	NM_001031615	Miranda
hsa-miR-34a-5p	222	ALDH3B2	NM_000695	Targetscan
hsa-miR-34a-5p	222	ALDH3B2	NM_001031615	Targetscan
hsa-miR-373-5p	222	ALDH3B2	NM_001031615	Miranda
hsa-miR-132-3p	223	ALDH9A1	NM_000696	Miranda
hsa-miR-132-3p	223	ALDH9A1	NM_000696	Targetscan
hsa-miR-181d	223	ALDH9A1	NM_000696	Miranda
hsa-miR-373-5p	223	ALDH9A1	NM_000696	Miranda
hsa-miR-7-5p	223	ALDH9A1	NM_000696	Miranda
hsa-miR-7-5p	223	ALDH9A1	NM_000696	Targetscan
hsa-miR-873-5p	223	ALDH9A1	NM_000696	Miranda
hsa-miR-873-5p	223	ALDH9A1	NM_000696	Targetscan
hsa-miR-181d	224	ALDH3A2	AK025677	Miranda
hsa-miR-181d	224	ALDH3A2	NM_001031806	Miranda
hsa-miR-32-5p	224	ALDH3A2	NM_001031806	Targetscan
hsa-miR-32-5p	224	ALDH3A2	NM_000382	Targetscan
hsa-miR-373-5p	224	ALDH3A2	NM_001031806	Eimmo
hsa-miR-373-5p	224	ALDH3A2	NM_000382	Eimmo
hsa-miR-7-5p	224	ALDH3A2	NM_001031806	Targetscan
hsa-miR-7-5p	224	ALDH3A2	NM_000382	Targetscan
hsa-miR-1271-5p	225	ABCD2	NM_005164	Miranda
hsa-miR-135a-3p	225	ABCD2	NM_005164	Targetscan
hsa-miR-152	225	ABCD2	NM_005164	Miranda
hsa-miR-200c-3p	225	ABCD2	NM_005164	Miranda
hsa-miR-200c-3p	225	ABCD2	NM_005164	mirDB
hsa-miR-32-5p	225	ABCD2	NM_005164	Targetscan
hsa-miR-33a-5p	225	ABCD2	NM_005164	Targetscan
hsa-miR-362-3p	225	ABCD2	NM_005164	Miranda
hsa-miR-373-5p	225	ABCD2	NM_005164	Miranda
hsa-miR-1271-5p	226	ALDOA	NM_184043	Miranda
hsa-miR-135a-3p	226	ALDOA	NM_184043	Miranda
hsa-miR-32-5p	226	ALDOA	NM_000034	Targetscan
hsa-miR-32-5p	226	ALDOA	NM_001127617	Targetscan
hsa-miR-32-5p	226	ALDOA	NM_184043	Targetscan
hsa-miR-32-5p	226	ALDOA	NM_184041	Targetscan
hsa-miR-34a-5p	226	ALDOA	NM_184043	Miranda
hsa-miR-34a-5p	226	ALDOA	NM_184041	Eimmo
hsa-miR-34a-5p	226	ALDOA	NM_001127617	Eimmo
hsa-miR-34a-5p	226	ALDOA	NM_000034	Eimmo
hsa-miR-34a-5p	226	ALDOA	NM_184043	Eimmo
hsa-miR-34a-5p	226	ALDOA	NM_184041	Targetscan
hsa-miR-34a-5p	226	ALDOA	NM_184043	Targetscan
hsa-miR-34a-5p	226	ALDOA	NM_001127617	Targetscan
hsa-miR-34a-5p	226	ALDOA	NM_000034	Targetscan
hsa-miR-34a-5p	226	ALDOA	NM_000034;NM_184041;NM_184043	PITA
hsa-miR-362-3p	226	ALDOA	CR590693	Miranda
hsa-miR-362-3p	226	ALDOA	NM_184043	Miranda
hsa-miR-135a-3p	229	ALDOB	NM_000035	Miranda
hsa-miR-135a-3p	229	ALDOB	NM_000035	Targetscan
hsa-miR-373-5p	229	ALDOB	NM_000035	Miranda
hsa-miR-32-5p	230	ALDOC	NM_005165	Targetscan
hsa-miR-7-5p	230	ALDOC	NM_005165	Miranda
hsa-miR-7-5p	230	ALDOC	NM_005165	Targetscan
hsa-miR-215	231	AKR1B1	NM_001628	Miranda
hsa-miR-7-5p	231	AKR1B1	NM_001628	Targetscan
hsa-miR-1271-5p	238	ALK	NM_004304	Miranda
hsa-miR-1271-5p	238	ALK	NM_004304	Eimmo
hsa-miR-1271-5p	238	ALK	NM_004304	PITA
hsa-miR-29c-5p	238	ALK	NM_004304	Miranda
hsa-miR-32-5p	238	ALK	NM_004304	Targetscan
hsa-miR-7-5p	238	ALK	NM_004304	Targetscan
hsa-miR-32-5p	239	ALOX12	NM_000697	Targetscan
hsa-miR-181d	240	ALOX5	NM_000698	Miranda
hsa-miR-34a-5p	240	ALOX5	NM_000698	Miranda
hsa-miR-34a-5p	240	ALOX5	NM_000698	Targetscan
hsa-miR-33a-5p	241	ALOX5AP	NM_001629	Miranda
hsa-miR-10a-5p	244	ANXA8L2	NM_001630	Miranda
hsa-miR-10a-5p	244	ANXA8L2	NM_001630	Targetscan
hsa-miR-32-5p	244	ANXA8L2	NM_001630	Targetscan
hsa-miR-873-5p	244	ANXA8L2	NM_001630	Targetscan
hsa-miR-135a-3p	245	ALOX12P2	NR_002710	Miranda
hsa-miR-135a-3p	245	ALOX12P2	AF020774	Miranda
hsa-miR-32-5p	247	ALOX15B	NM_001141	Targetscan
hsa-miR-32-5p	247	ALOX15B	NM_001039130	Targetscan
hsa-miR-32-5p	247	ALOX15B	NM_001039131	Targetscan
hsa-miR-32-5p	248	ALPI	NM_001631	Targetscan
hsa-miR-10a-5p	249	ALPL	NM_000478	Miranda
hsa-miR-10a-5p	249	ALPL	NM_000478	Targetscan
hsa-miR-10a-5p	249	ALPL	NM_001177520	Targetscan
hsa-miR-10a-5p	249	ALPL	NM_001127501	Targetscan
hsa-miR-10a-5p	249	ALPL	NM_000478	PITA
hsa-miR-32-5p	249	ALPL	NM_000478	Targetscan
hsa-miR-32-5p	249	ALPL	NM_001177520	Targetscan
hsa-miR-32-5p	249	ALPL	NM_001127501	Targetscan
hsa-miR-505-3p	250	ALPP	NM_001632	Miranda
hsa-miR-505-3p	250	ALPP	CR621490	Miranda
hsa-miR-505-5p	250	ALPP	NM_001632	Miranda
hsa-miR-505-5p	250	ALPP	CR621490	Miranda
hsa-miR-505-3p	251	ALPPL2	NM_031313	Miranda
hsa-miR-505-5p	251	ALPPL2	NM_031313	Miranda
hsa-miR-10a-5p	257	ALX3	NM_006492	Miranda
hsa-miR-10a-5p	257	ALX3	NM_006492	Targetscan
hsa-miR-34a-5p	257	ALX3	NM_006492	Miranda
hsa-miR-34a-5p	257	ALX3	NM_006492	Targetscan
hsa-miR-152	258	AMBN	NM_016519	Miranda
hsa-miR-200c-3p	258	AMBN	NM_016519	Miranda
hsa-miR-32-5p	258	AMBN	NM_016519	Miranda
hsa-miR-32-5p	258	AMBN	NM_016519	Targetscan
hsa-miR-33a-5p	258	AMBN	NM_016519	Miranda
hsa-miR-33a-5p	258	AMBN	NM_016519	Targetscan
hsa-miR-373-5p	258	AMBN	NM_016519	Miranda
hsa-miR-505-3p	258	AMBN	NM_016519	Miranda
hsa-miR-505-5p	258	AMBN	NM_016519	Miranda
hsa-miR-873-5p	259	AMBP	AK303795	Miranda
hsa-miR-132-3p	262	AMD1	NM_001634	Miranda
hsa-miR-132-3p	262	AMD1	NM_001634	Eimmo
hsa-miR-132-3p	262	AMD1	NM_001033059	Eimmo
hsa-miR-132-3p	262	AMD1	NM_001287216	Pictar
hsa-miR-132-3p	262	AMD1	NM_001287215	Pictar
hsa-miR-132-3p	262	AMD1	NM_001634	Pictar
hsa-miR-132-3p	262	AMD1	NM_001287214	Pictar
hsa-miR-132-3p	262	AMD1	NR_109768	Pictar
hsa-miR-132-3p	262	AMD1	NM_001033059	Targetscan
hsa-miR-132-3p	262	AMD1	NM_001634	Targetscan
hsa-miR-132-3p	262	AMD1	NM_001033059;NM_001634	PITA
hsa-miR-32-5p	262	AMD1	NM_001634	Targetscan
hsa-miR-32-5p	262	AMD1	NM_001033059	Targetscan
hsa-miR-505-3p	262	AMD1	NM_001634	Miranda
hsa-miR-505-3p	262	AMD1	NM_001033059	Targetscan
hsa-miR-505-3p	262	AMD1	NM_001634	Targetscan
hsa-miR-505-3p	262	AMD1	NM_001033059;NM_001634	PITA
hsa-miR-505-5p	262	AMD1	NM_001634	Miranda
hsa-miR-505-5p	262	AMD1	NM_001033059	Targetscan
hsa-miR-505-5p	262	AMD1	NM_001634	Targetscan
hsa-miR-505-5p	262	AMD1	NM_001033059;NM_001634	PITA
hsa-miR-7-5p	262	AMD1	NM_001033059	Targetscan
hsa-miR-7-5p	262	AMD1	NM_001634	Targetscan
hsa-miR-876-3p	262	AMD1	NM_001287216	Pictar
hsa-miR-876-3p	262	AMD1	NM_001287215	Pictar
hsa-miR-876-3p	262	AMD1	NM_001634	Pictar
hsa-miR-876-3p	262	AMD1	NM_001287214	Pictar
hsa-miR-876-3p	262	AMD1	NR_109768	Pictar
hsa-miR-876-3p	262	AMD1	NM_001033059;NM_001634	PITA
hsa-miR-33a-5p	265	AMELX	NM_182680	Miranda
hsa-miR-181d	267	AMFR	NM_001144	Miranda
hsa-miR-181d	267	AMFR	NM_001144	Eimmo
[truncated: 192,622 more rows]
